# Supplementary material for: Testosterone-induced metabolic changes in seminal vesicle epithelium modify seminal plasma components with potential to improve sperm motility
Source: eLife journal article supplement (doi:10.7554/elife.95541), 2024-03-14
Supplement: fig5-figsupp1-data2 [file elife-95541-fig5-figsupp1-data2-v1.pdf]

**Figure 5 figure supplement 1A**

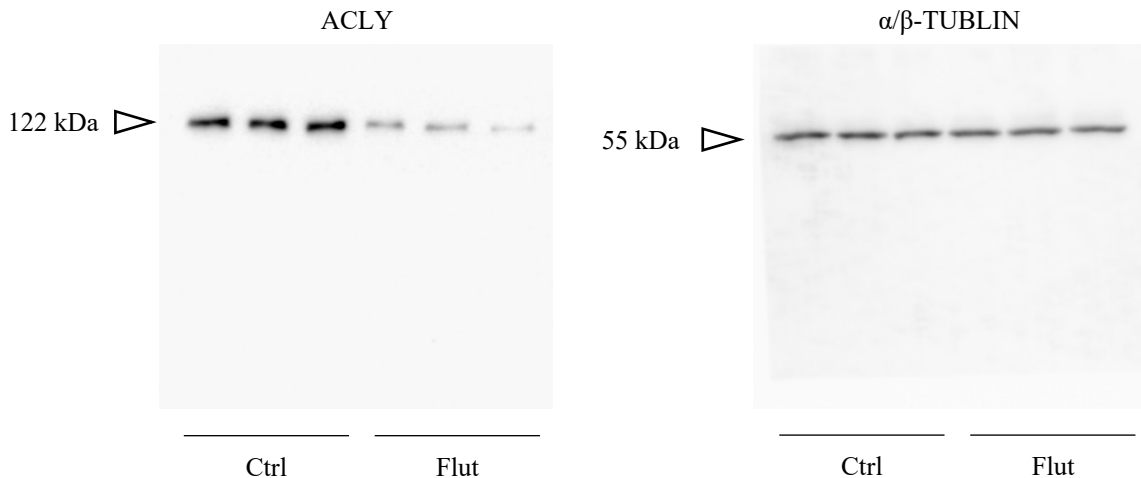

**Figure 5—figure supplement 1—source data 2.** PDF file containing original western blots for Figure 5 figure supplement 1A, indicating the relevant bands and treatments. Representative Western blot images of ACLY and  $\alpha$ -tubulin in three sets of seminal vesicle collected from 50 mg/kg flutamide subcutaneously for 7 days (Flut) or vehicle treated mice (Ctrl).
