# Supplementary material for: Testosterone-induced metabolic changes in seminal vesicle epithelium modify seminal plasma components with potential to improve sperm motility
Source: eLife journal article supplement (doi:10.7554/elife.95541), 2024-03-14
Supplement: fig6-figsupp2-data2 [file elife-95541-fig6-figsupp2-data2-v1.pdf]

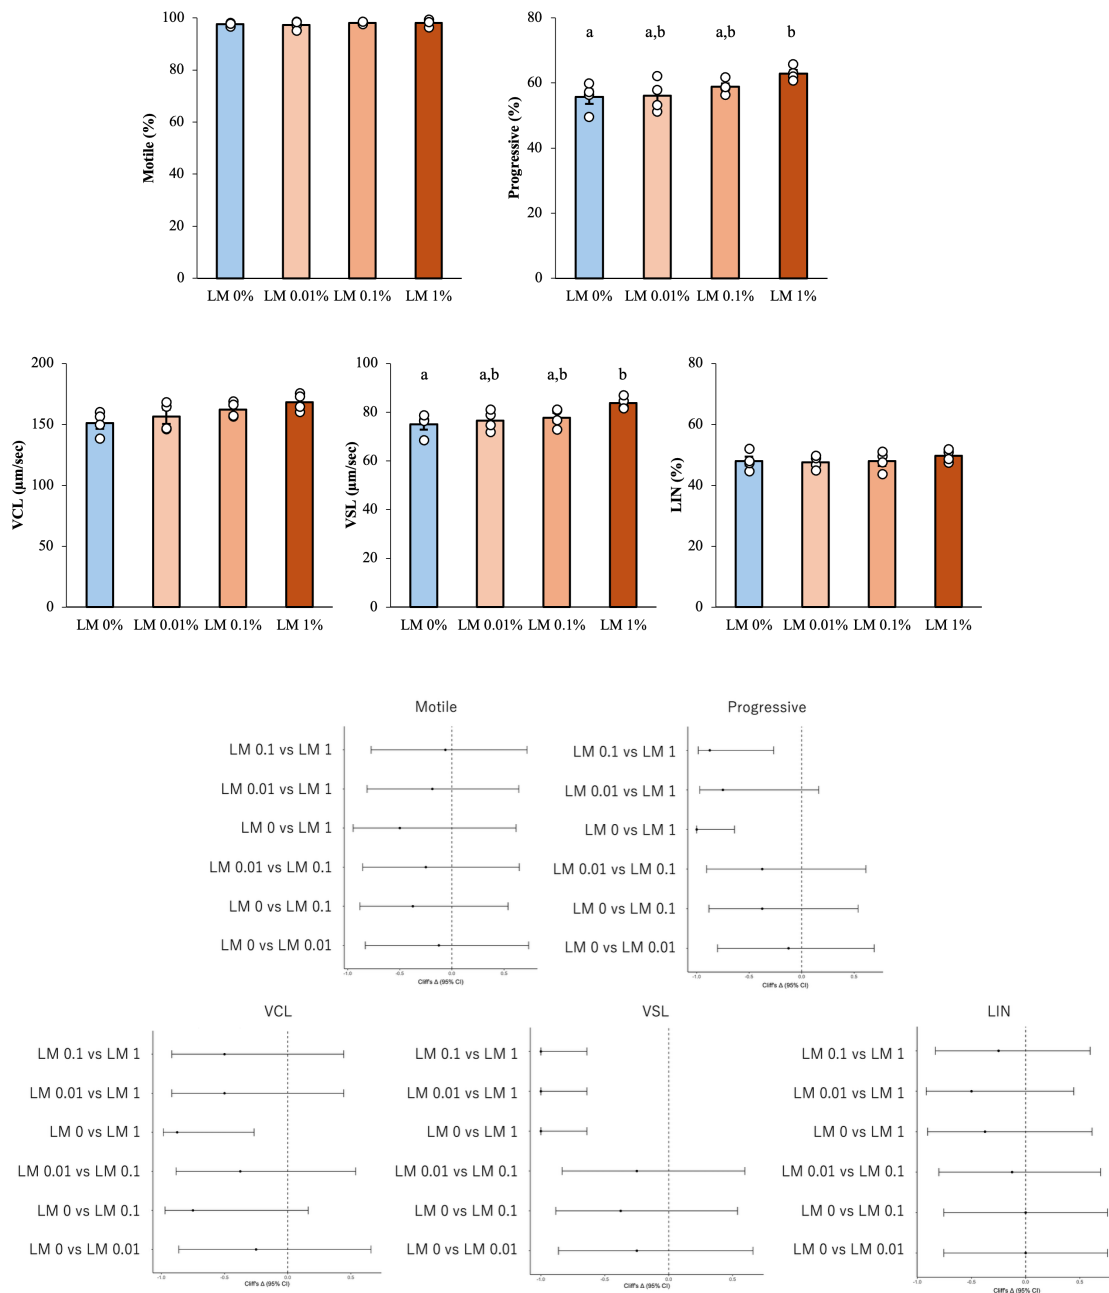

**Results of reanalysis of Figure 6—figure supplement 2 using nonparametric tests and effect sizes with 95% confidence intervals** Upper part; Differences between groups were assessed by Kruskal–Wallis test, differences among values were analyzed by Dunn’s post-hoc comparisons (Bonferroni corrected) for multiple comparisons. Different letters represent significantly different groups. Lower part; The effect sizes with 95 % confidence intervals. For example, Cliff’s  $\Delta = -1$  (95% CI  $\sim -0.6$ ) in VSL’s “LM 0 vs LM1” means that LM 1% values exceed LM 0 %values in all pairs.
