# Supplementary material for: Testosterone-induced metabolic changes in seminal vesicle epithelium modify seminal plasma components with potential to improve sperm motility
Source: eLife journal article supplement (doi:10.7554/elife.95541), 2024-03-14
Supplement: fig7-data2 [file elife-95541-fig7-data2-v1.pdf]

**Fig7A**

ACLY

 $\alpha/\beta$ -TUBULIN

122 kDa ▷

55 kDa ▷

Ctrl

Testo

Ctrl

Testo

**Figure 7—source data 2.** PDF file containing original western blots for Figure 7A, indicating the relevant bands and treatments. Western blot images of ACLY and  $\alpha/\beta$ -tubulin in three sets of seminal vesicle epithelial cells cultured with 100 ng/mL testosterone (Testo) or in vehicle (Ctrl) for 7 days.
