# Supplementary material for: Testosterone-induced metabolic changes in seminal vesicle epithelium modify seminal plasma components with potential to improve sperm motility
Source: eLife. 2025 Dec 18;13:RP95541. doi: 10.7554/eLife.95541 (PMC12714332; doi:10.7554/eLife.95541)
Supplement: Figure 1—figure supplement 1—source data 1. [file elife-95541-fig1-figsupp1-data1.xlsx]

## Sheet: Supplementary Figure 1
Figure S1
Figure S1 A	Average	1	2	3	4	5	6	7	8	9
Motility (%)	91.5	96.9	77.8	98.7	94.6	89.8	91.2
Progressive motile (%)	57.5	60.5	46.7	60.4	55.1	56.2	66.2
VCL (µm/sec)	190.8	221.358	236.323	207.371	156.038	160.221	161.205	183.444	198.328	192.783
VSL (µm/sec)	74.7	78.1268	51.0956	78.415	84.8496	69.3068	68.6393	81.9705	76.1054	84.1182
LIN (%)	38	32.3777	18.6687	25.6479	53.7899	46.0576	43.8263	42.4043	36.8875	42.0739
Viscosity of HTF (mPa∙s)	0.8	0.83	0.82	0.816667
Figure S1 B	Ctrl	Flu
1	6.36535	1.29764
2	3.32242	3.89167
3	1.40772	3.60064
4	5.10914	4.83891
5	2.25481	5.65116
6	4.38519	2.71241
Figure S1 D	HTF	Oligomycin	FCCP	Antimycin
1	67.206	55.762	50.527	12.652
2	65.988	53.705	56.368	16.306
3	68.638	56.886	51.563	16.578
Figure S1 E	HTF	Ctrl	Flu
	0.875	0.25	0.238095
	0.816514	0.1875	0.0666667
	0.991667	0.166667	0.142857
		0.125	0.0952381
		0.416667	0.125
		0.4375
			(Cleavage /MⅡ oocytes)
