# Supplementary material for: Testosterone-induced metabolic changes in seminal vesicle epithelium modify seminal plasma components with potential to improve sperm motility
Source: eLife. 2025 Dec 18;13:RP95541. doi: 10.7554/eLife.95541 (PMC12714332; doi:10.7554/eLife.95541)
Supplement: Figure 1—figure supplement 2—source data 1. [file elife-95541-fig1-figsupp2-data1.xlsx]

## Sheet: Supplementary Figure 2
Figure S2
Figure S1 A	VSL				Motile				Progressive
	HTF	Aged SV			HTF	Aged SV			HTF	Aged SV
1	68.0218	46.1729		1	88.6	78.9		1	51.9	42.5
2	69.4269	37.9939		2	96.2	79.6		2	62.7	26.9
3	69.7034	55.4504		3	94.7	83		3	54.3	44.4
Figure S1 B	Young	Aged		Figure S1 C	Young	Young+Anti	Aged	Aged+Anti
1	2.76619	1.48911		1	75.787	56.575	66.901	19.492
2	1.62921	1.31116		2	78.863	50.168	68.505	22.094
3	1.96025	1.45601		3	75.634	32.717	68.087	38.419
4	3.56409	0.998183		4	81.367	34.842	59.112	20.247
				5	79.85	52.189	62.949	36.663
				6	85.206	48.92	57.552	37.155
				7	74.261	45.626	58.811	39.413
				8	69.838	42.851	42.602	37.811
				9	73.103	53.922	57.802	42.422
