# Supplementary material for: Testosterone-induced metabolic changes in seminal vesicle epithelium modify seminal plasma components with potential to improve sperm motility
Source: eLife. 2025 Dec 18;13:RP95541. doi: 10.7554/eLife.95541 (PMC12714332; doi:10.7554/eLife.95541)
Supplement: Figure 1—source data 1. [file elife-95541-fig1-data1.xlsx]

## Sheet: Figure 1
	Figure 1
	Figure 1 B	Motile			Figure 1 C	Progressive			Figure 1 D	VCL			Figure 1 E	VSL			Figure 1 F	LIN			Figure 1 G	Viscosity
	Pros	SV			Pros	SV			Pros	SV			Pros	SV			Pros	SV			Pros	SV
1	87.9	98.6		1	39.9	70.3		1	144.248	228.119		1	74.8317	118.174		1	50.0747	52.5963		1	0.86	0.84
2	84.2	94.8		2	37.2	60.9		2	140.927	223.916		2	62.8339	113.381		2	46.7061	50.7417		2	0.86	0.91
3	96.6	95		3	58.1	82.5		3	178.261	206.038		3	94.4939	100.267		3	42.4043	55.0043		3	0.86	0.875
4	95.8	100		4	53.6	86.1		4	169.916	201.924		4	68.6864	111.758		4	38.3979	42.7562
5	93.7	100		5	56.7	74.3		5	179.14	185.767		5	61.6636	91.4516		5	30.1505	44.9661
6	89.2	96.6		6	48.4	77.8		6	161.574	190.254		6	55.5466	95.4553		6	41.4254	44.0461
								7	133.794	134.507		7	54.9246	82.3689		7	41.399	62.1267
								8	105.941	127.698		8	47.9795	66.9133		8	43.6343	58.2982
								9	198.874	117.558		9	79.2515	65.2924		9	39.7645	50.7675
	Figure 1 I	Motile			Figure 1 J	Progressive			Figure 1 K	LIN			Figure 1 L	VSL			Figure 1 M	hMMP
	Ctrl	Flutamide			Ctrl	Flutamide			Ctrl	Flutamide			Ctrl	Flutamide			Ctrl	Ctrl+Anti	Flu	Flu+Anti
1	88.5	84		1	57.4	37.7		1	52.0866	40.6153		1	102.327	76.9744		1	85.902	52.439	39.159	17.828
2	93.5	90.3		2	61.3	42.7		2	50.4496	44.2333		2	96.1076	75.7624		2	77.809	50.622	60.746	20.214
3	90.6	83.8		3	67.4	45.6		3	52.2478	40.5154		3	86.8989	72.2073		3	85.134	49.402	52.553	26.018
4	91	74.7		4	51.9	43.9		4	49.3873	48.8539		4	102.658	92.4025		4	73.971	48.934	69.338	13.369
5	82.7	78.6		5	48.1	34.2		5	51.1971	49.0711		5	101.786	87.2594		5	83.949	55.627	66.707	11.102
6	93	84.1		6	48.7	37.3		6	50.1024	46.0138		6	106.759	88.3657		6	85.847	19.339	34.37	26.453
																7	84.767	50.807	59.125	18.786
																8	90.13	49.511	44.953	16.589
