# Supplementary material for: Testosterone-induced metabolic changes in seminal vesicle epithelium modify seminal plasma components with potential to improve sperm motility
Source: eLife. 2025 Dec 18;13:RP95541. doi: 10.7554/eLife.95541 (PMC12714332; doi:10.7554/eLife.95541)
Supplement: Figure 2—source data 1. [file elife-95541-fig2-data1.xlsx]

## Sheet: Figure 2
Figure 2
Figure 2 C
ki-67	Ctrl	Flu		TUNEL	Ctrl	Flu
1	0.0918728	0.115385		1	0.0578512	0.0394737
2	0.0670732	0.0945055		2	0.0612245	0.0357143
3	0.028436	0.0973451		3	0.0413793	0.0632911
4	0.0952381	0.134884		4	0.0247934	0.0201342
5	0.103004	0.14218		5	0.00900901	0.0379747
6	0.0789474	0.154734		6	0.0322581	0.0340136
7	0.0798611	0.136364		7	0.0555556	0.0160428
8	0.108545	0.144828		8	0.0597015	0.0290909
9	0.0803571	0.274854		9	0.00884956	0.0423729
10	0.0952381	0.20098		10	0.0671642	0.0211268
11	0.103175			11	0.0212766	0.0272109
		(%)				(%)
Figure 2 E
		ctrl	1	10	100
d2	1	6328.12	6093.75	5156.25	3046.88
	2	4687.5	5625	4687.5	3515.62
	3	8437.5	7500	4453.12	3515.62
d4	1	11015.6	11718.8	9375	7500
	2	13359.4	10078.1	16406.2	4218.75
	3	11484.4	9843.75	8437.5	7812.5
d6	1	12890.6	12421.9	6562.5	4218.75
	2	15937.5	10312.5	6562.5	7968.75
	3	14765.6	11484.4	6093.75	5390.62
d8	1	22968.8	15468.8	12421.9	7500
	2	20390.6	16640.6	9375	8906.25
	3	19218.8	18750	8906.25	6796.88
					(cells)
Figure 2 F
G0/G1	Ctrl	Testo		S	Ctrl	Testo		G2/M	Ctrl	Testo
1	54.743	70.509		1	9.646	12.869		1	28.135	4.29
2	60.105	69.42		2	6.762	12.054		2	26.597	4.129
3	61.071	68.475		3	13.829	11.977		3	19.025	5.65
4	64.081	67.349		4	19.88	11.49		4	10.015	6.485
		(%)				(%)				(%)
