# Supplementary material for: Testosterone-induced metabolic changes in seminal vesicle epithelium modify seminal plasma components with potential to improve sperm motility
Source: eLife. 2025 Dec 18;13:RP95541. doi: 10.7554/eLife.95541 (PMC12714332; doi:10.7554/eLife.95541)
Supplement: Figure 3—source data 1. [file elife-95541-fig3-data1.xlsx]

## Sheet: Figure 3a,b
Figure 3
Figure 3 A,B
ID	Symbol	ExpMean	Exp Samples A	Exp Samples B	log2FC	lfcSE	Stat	p-value	padj
ENSMUSG00000009281.6	Rarres2	52.297	97.326	7.268	-3.572	0.147	-21.036	3.1e-98	5.6e-95
ENSMUSG00000056270.3	Prr9	14.114	26.633	1.595	-3.413	0.194	-17.532	8.2e-69	4.6e-66
ENSMUSG00000001506.10	Col1a1	245.443	448.666	42.22	-3.379	0.149	-19.024	1.1e-80	9.1e-78
ENSMUSG00000084353.1	Gm15452	4.693	9.385	0	-3.376	2.049	-2.393	0.017	0.079
ENSMUSG00000029661.16	Col1a2	141.359	258.127	24.592	-3.34	0.129	-21.361	3.1e-101	6.5e-98
ENSMUSG00000037225.13	Fgf2	72.175	132.118	12.231	-3.331	0.11	-22.163	7.7e-109	2.0e-105
ENSMUSG00000001020.8	S100a4	125.615	227.83	23.399	-3.229	0.209	-13.387	7.2e-41	1.5e-38
ENSMUSG00000026042.16	Col5a2	134.386	242.107	26.665	-3.135	0.124	-20.617	1.9e-94	2.8e-91
ENSMUSG00000031486.15	Adgra2	26.074	47.531	4.616	-3.111	0.122	-22.273	6.8e-110	2.3e-106
ENSMUSG00000031375.17	Bgn	367.39	658.406	76.374	-3.091	0.083	-29.526	1.3e-191	3.2e-187
ENSMUSG00000031740.8	Mmp2	49.723	89.764	9.682	-3.087	0.105	-25.339	1.2e-141	7.0e-138
ENSMUSG00000079017.3	Ifi27l2a	34.57	62.606	6.534	-3.078	0.271	-9.71	2.7e-22	2.2e-20
ENSMUSG00000026475.7	Rgs16	46.651	83.976	9.325	-3.041	0.09	-27.972	3.6e-172	4.2e-168
ENSMUSG00000031519.3	Asb5	25.924	46.993	4.855	-3.035	0.167	-16.017	9.7e-58	4.0e-55
ENSMUSG00000013584.5	Aldh1a2	23.522	42.699	4.344	-3.032	0.129	-20.471	3.9e-93	5.2e-90
ENSMUSG00000028883.17	Sema3a	9.716	18.087	1.344	-3.025	0.14	-20.47	4.0e-93	5.2e-90
ENSMUSG00000026837.15	Col5a1	53.653	96.192	11.113	-3.004	0.154	-16.169	8.4e-59	3.6e-56
ENSMUSG00000032532.7	Cck	113.86	202.925	24.795	-2.983	0.173	-14.043	8.5e-45	2.1e-42
ENSMUSG00000074676.2	Foxs1	18.521	33.613	3.429	-2.966	0.183	-14.529	7.9e-48	2.3e-45
ENSMUSG00000078141.3	Gm2399	3.387	6.775	0	-2.959	2.152	-1.905	0.057	0.206
ENSMUSG00000041324.14	Inhba	163.686	289.797	37.575	-2.914	0.105	-21.204	8.7e-100	1.7e-96
ENSMUSG00000017737.2	Mmp9	79.699	141.258	18.141	-2.894	0.108	-21.505	1.4e-102	3.3e-99
ENSMUSG00000003948.17	Mmd	55.356	98.236	12.475	-2.881	0.094	-24.756	2.7e-135	1.0e-131
ENSMUSG00000011256.16	Adam19	20.734	37.162	4.306	-2.846	0.124	-20.138	3.4e-90	4.2e-87
ENSMUSG00000031673.6	Cdh11	18.584	33.348	3.821	-2.833	0.128	-19.181	5.4e-82	4.7e-79
ENSMUSG00000043613.8	Mmp3	31.984	56.76	7.208	-2.815	0.152	-15.34	4.1e-53	1.5e-50
ENSMUSG00000022367.7	Has2	11.026	20.045	2.008	-2.807	0.179	-15.073	2.4e-51	8.3e-49
ENSMUSG00000000753.15	Serpinf1	92.791	163.075	22.506	-2.803	0.146	-16.475	5.6e-61	2.5e-58
ENSMUSG00000002847.6	Pla1a	12.048	21.823	2.273	-2.802	0.15	-17.432	4.7e-68	2.5e-65
ENSMUSG00000076870.2	Trdj1	2.964	5.929	0	-2.793	2.247	-1.674	0.094	0.299
ENSMUSG00000074506.4	Gm10705	8.727	15.999	1.455	-2.792	1.207	-2.466	0.014	0.067
ENSMUSG00000030116.14	Mfap5	37.268	65.868	8.667	-2.79	0.134	-17.213	2.1e-66	1.1e-63
ENSMUSG00000099796.1	Gm7893	2.958	5.916	0	-2.79	2.166	-1.835	0.067	0.233
ENSMUSG00000023092.16	Fhl1	92.986	163.026	22.945	-2.776	0.087	-24.764	2.2e-135	1.0e-131
ENSMUSG00000026728.9	Vim	404.265	704.3	104.23	-2.745	0.139	-15.471	5.4e-54	2.0e-51
ENSMUSG00000027204.13	Fbn1	24.983	44.213	5.754	-2.743	0.122	-18.62	2.2e-77	1.5e-74
ENSMUSG00000029070.9	Mxra8	30.081	53.06	7.101	-2.738	0.11	-19.982	7.9e-89	9.3e-86
ENSMUSG00000068220.6	Lgals1	845.012	1469.42	220.601	-2.73	0.107	-19.593	1.8e-85	1.8e-82
ENSMUSG00000004098.7	Col5a3	20.256	35.907	4.605	-2.719	0.09	-25.5	2.0e-143	1.6e-139
ENSMUSG00000047562.3	Mmp10	23.705	41.893	5.517	-2.718	0.157	-14.411	4.4e-47	1.2e-44
ENSMUSG00000040212.12	Emp3	36.392	63.88	8.905	-2.712	0.158	-13.228	6.1e-40	1.2e-37
ENSMUSG00000019539.11	Rcn3	53.948	94.289	13.608	-2.706	0.165	-13.979	2.1e-44	5.1e-42
ENSMUSG00000017493.12	Igfbp4	63.516	110.792	16.241	-2.697	0.132	-16.991	9.6e-65	4.8e-62
ENSMUSG00000062345.10	Serpinb2	17.723	31.44	4.007	-2.696	0.155	-14.947	1.6e-50	5.2e-48
ENSMUSG00000027669.14	Gnb4	10.486	18.894	2.078	-2.693	0.16	-14.103	3.6e-45	9.2e-43
ENSMUSG00000026600.12	Soat1	27.694	48.693	6.696	-2.691	0.11	-17.916	8.9e-72	5.5e-69
ENSMUSG00000056412.6	Gm12396	8.588	15.6	1.576	-2.688	0.984	-2.852	0.004	0.026
ENSMUSG00000090958.2	Lrrc32	86.063	149.699	22.427	-2.685	0.125	-15.887	7.9e-57	3.1e-54
ENSMUSG00000063767.4	S100a7a	9.698	17.513	1.883	-2.683	0.236	-10.274	9.3e-25	8.4e-23
ENSMUSG00000020053.18	Igf1	11.117	19.965	2.269	-2.681	0.219	-9.233	2.6e-20	1.8e-18
ENSMUSG00000029718.14	Pcolce	37.316	65.254	9.379	-2.674	0.153	-14.776	2.1e-49	6.4e-47
ENSMUSG00000026786.14	Apbb1ip	13.07	23.316	2.823	-2.669	0.121	-19.711	1.7e-86	1.8e-83
ENSMUSG00000051279.2	Gdf6	3.208	6.261	0.154	-2.653	0.317	-14.836	8.6e-50	2.7e-47
ENSMUSG00000018819.10	Lsp1	18.042	31.845	4.238	-2.649	0.184	-10.571	4.1e-26	4.1e-24
ENSMUSG00000024529.13	Lox	305.139	527.047	83.23	-2.648	0.133	-15.272	1.2e-52	4.2e-50
ENSMUSG00000024620.11	Pdgfrb	8.273	14.992	1.555	-2.646	0.141	-18.641	1.5e-77	1.1e-74
ENSMUSG00000002289.15	Angptl4	30.534	53.335	7.733	-2.637	0.101	-21.015	4.8e-98	8.0e-95
ENSMUSG00000001555.10	Fkbp10	55.462	96.227	14.697	-2.631	0.137	-16.137	1.4e-58	5.9e-56
ENSMUSG00000013921.15	Clip3	17.462	30.731	4.192	-2.612	0.171	-13.65	2.0e-42	4.5e-40
ENSMUSG00000034205.16	Loxl2	138.387	238.361	38.412	-2.602	0.134	-14.854	6.5e-50	2.1e-47
ENSMUSG00000023046.6	Igfbp6	27.503	47.941	7.064	-2.602	0.146	-14.449	2.5e-47	7.1e-45
ENSMUSG00000022665.14	Ccdc80	43.913	76.094	11.731	-2.598	0.158	-12.716	4.8e-37	8.3e-35
ENSMUSG00000029231.15	Pdgfra	9.124	16.369	1.878	-2.593	0.13	-16.955	1.8e-64	8.4e-62
ENSMUSG00000026204.15	Ptprn	19.993	35.01	4.975	-2.591	0.135	-19.45	2.9e-84	2.8e-81
ENSMUSG00000056758.14	Hmga2	28.274	49.211	7.336	-2.591	0.124	-16.99	9.8e-65	4.8e-62
ENSMUSG00000000555.8	Itga5	166.569	286.22	46.918	-2.584	0.112	-17.587	3.1e-69	1.8e-66
ENSMUSG00000018593.13	Sparc	824.906	1413.79	236.019	-2.578	0.11	-17.521	1.0e-68	5.4e-66
ENSMUSG00000050069.3	Grem2	10.668	18.985	2.351	-2.576	0.179	-13.369	9.1e-41	1.9e-38
ENSMUSG00000038521.17	C1s1	15.793	27.747	3.839	-2.571	0.156	-12.11	9.3e-34	1.4e-31
ENSMUSG00000020695.14	Mrc2	10.103	17.981	2.225	-2.557	0.145	-15.851	1.4e-56	5.4e-54
ENSMUSG00000020473.13	Aebp1	79.633	136.839	22.426	-2.557	0.106	-18.633	1.7e-77	1.2e-74
ENSMUSG00000032334.10	Loxl1	31.307	54.221	8.393	-2.556	0.143	-14.415	4.1e-47	1.1e-44
ENSMUSG00000074934.3	Grem1	12.701	22.412	2.989	-2.553	0.191	-11.984	4.3e-33	6.3e-31
ENSMUSG00000020598.16	Nrcam	17.177	30.012	4.342	-2.537	0.142	-15.021	5.4e-51	1.8e-48
ENSMUSG00000050578.10	Mmp13	31.076	53.713	8.44	-2.535	0.116	-17.378	1.2e-67	6.3e-65
ENSMUSG00000062184.11	Hs6st2	14.129	24.789	3.47	-2.528	0.167	-12.292	1.0e-34	1.6e-32
ENSMUSG00000059991.7	Nptx2	7.084	12.777	1.391	-2.527	0.184	-13.873	9.3e-44	2.2e-41
ENSMUSG00000035385.5	Ccl2	9.88	17.537	2.223	-2.524	0.373	-6.304	2.9e-10	6.8e-9
ENSMUSG00000060594.6	Layn	18.703	32.527	4.878	-2.512	0.161	-12.966	1.9e-38	3.5e-36
ENSMUSG00000042821.7	Snai1	9.11	16.184	2.035	-2.501	0.199	-11.865	1.8e-32	2.5e-30
ENSMUSG00000026586.16	Prrx1	10.234	18.086	2.382	-2.497	0.12	-18.748	2.0e-78	1.5e-75
ENSMUSG00000026228.6	Htr2b	5.675	10.337	1.013	-2.494	0.24	-10.453	1.4e-25	1.4e-23
ENSMUSG00000106161.1	Pvrig-ps	2.316	4.632	0	-2.494	3.088	-1.149	0.251	0.579
ENSMUSG00000046402.10	Rbp1	22.988	39.688	6.288	-2.481	0.143	-14.167	1.5e-45	3.8e-43
ENSMUSG00000016458.14	Wt1	5.938	10.762	1.114	-2.476	0.204	-12.643	1.2e-36	2.1e-34
ENSMUSG00000028031.6	Dkk2	5.085	9.316	0.855	-2.476	0.218	-12.986	1.5e-38	2.7e-36
ENSMUSG00000022221.14	Ripk3	19.258	33.335	5.181	-2.474	0.122	-18.558	7.0e-77	4.5e-74
ENSMUSG00000028073.15	Pear1	8.663	15.372	1.955	-2.47	0.219	-10.028	1.1e-23	9.7e-22
ENSMUSG00000026674.9	Ddr2	10.401	18.284	2.518	-2.455	0.119	-16.477	5.3e-61	2.4e-58
ENSMUSG00000001819.4	Hoxd13	6.902	12.345	1.459	-2.44	0.173	-14.086	4.6e-45	1.2e-42
ENSMUSG00000028111.4	Ctsk	10.101	17.744	2.458	-2.438	0.168	-13.11	2.9e-39	5.6e-37
ENSMUSG00000038193.4	Hand2	5.809	10.495	1.123	-2.437	0.194	-13.211	7.6e-40	1.5e-37
ENSMUSG00000031520.6	Vegfc	8.635	15.255	2.016	-2.43	0.173	-13.027	8.6e-39	1.6e-36
ENSMUSG00000029664.10	Tfpi2	31.049	53.03	9.068	-2.424	0.107	-18.161	1.1e-73	6.7e-71
ENSMUSG00000090728.1	Gm17420	12.74	22.154	3.326	-2.42	1.191	-1.851	0.064	0.227
ENSMUSG00000020427.11	Igfbp3	14.068	24.388	3.747	-2.419	0.149	-13.802	2.5e-43	5.8e-41
ENSMUSG00000020814.13	Mxra7	25.187	43.116	7.258	-2.417	0.209	-8.955	3.4e-19	2.1e-17
ENSMUSG00000034612.7	Chst11	18.276	31.471	5.081	-2.417	0.102	-19.411	6.2e-84	5.6e-81
ENSMUSG00000040249.15	Lrp1	62.827	106.428	19.227	-2.409	0.085	-22.189	4.3e-109	1.3e-105
ENSMUSG00000005397.8	Nid1	58.855	99.655	18.055	-2.401	0.103	-17.741	2.0e-70	1.2e-67
ENSMUSG00000010797.6	Wnt2	6.594	11.756	1.432	-2.391	0.175	-13.536	9.6e-42	2.1e-39
ENSMUSG00000075122.4	Cd80	9.071	15.913	2.229	-2.389	0.181	-12.107	9.7e-34	1.4e-31
ENSMUSG00000007888.15	Crlf1	63.79	107.758	19.822	-2.385	0.373	-4.552	5.3e-6	6.6e-5
ENSMUSG00000022661.14	Cd200	21.202	36.257	6.147	-2.382	0.126	-14.651	1.3e-48	4.0e-46
ENSMUSG00000031565.18	Fgfr1	43.18	73.109	13.252	-2.379	0.097	-18.988	2.1e-80	1.7e-77
ENSMUSG00000020241.13	Col6a2	10.989	19.109	2.869	-2.378	0.134	-15.334	4.5e-53	1.7e-50
ENSMUSG00000018916.5	Csf2	10.34	18.01	2.67	-2.373	0.289	-7.226	5.0e-13	1.7e-11
ENSMUSG00000068196.4	Col8a1	10.146	17.685	2.608	-2.373	0.504	-4.289	1.8e-5	2.0e-4
ENSMUSG00000027694.9	Gm8325	7.085	12.545	1.626	-2.367	1.786	-1.385	0.166	0.446
ENSMUSG00000028005.13	Gucy1b1	3.726	6.917	0.535	-2.367	0.21	-14.601	2.8e-48	8.1e-46
ENSMUSG00000037868.15	Egr2	6.886	12.21	1.563	-2.366	0.205	-11.216	3.4e-29	4.1e-27
ENSMUSG00000017969.13	Ptgis	8.506	14.915	2.097	-2.361	0.165	-13.019	9.5e-39	1.8e-36
ENSMUSG00000114022.1	Gm17330	2.059	4.118	0	-2.355	3.447	-0.888	0.375	0.73
ENSMUSG00000029163.9	Emilin1	14.454	24.839	4.07	-2.35	0.173	-12.421	2.0e-35	3.3e-33
ENSMUSG00000022044.14	Stmn4	2.799	5.352	0.246	-2.349	0.427	-8.826	1.1e-18	6.4e-17
ENSMUSG00000038210.10	Hoxa11	6.826	12.07	1.582	-2.34	0.169	-13.698	1.0e-42	2.3e-40
ENSMUSG00000019899.16	Lama2	5.992	10.673	1.311	-2.336	0.115	-20.636	1.3e-94	2.0e-91
ENSMUSG00000045573.9	Penk	7.922	13.893	1.951	-2.335	0.257	-7.996	1.3e-15	5.6e-14
ENSMUSG00000038276.12	Asic3	5.16	9.281	1.039	-2.334	0.309	-8.665	4.5e-18	2.5e-16
ENSMUSG00000029121.15	Crmp1	4.393	7.99	0.796	-2.324	0.217	-12.994	1.3e-38	2.5e-36
ENSMUSG00000027955.16	Fam198b	16.976	28.966	4.987	-2.324	0.179	-9.022	1.8e-19	1.2e-17
ENSMUSG00000050910.5	Cdr2l	11.669	20.118	3.22	-2.323	0.188	-10.733	7.1e-27	7.5e-25
ENSMUSG00000000359.3	Rem1	4.097	7.487	0.707	-2.314	0.287	-9.998	1.5e-23	1.3e-21
ENSMUSG00000032291.8	Crabp1	4.65	8.403	0.896	-2.31	0.391	-6.68	2.4e-11	6.5e-10
ENSMUSG00000001119.7	Col6a1	11.763	20.235	3.291	-2.307	0.105	-18.662	1.0e-77	7.4e-75
ENSMUSG00000032271.13	Nnmt	11.713	20.142	3.284	-2.303	0.231	-9.173	4.6e-20	3.0e-18
ENSMUSG00000009687.14	Fxyd5	82.597	138.012	27.182	-2.302	0.125	-14.164	1.5e-45	3.9e-43
ENSMUSG00000021508.11	Cxcl14	9.446	16.362	2.531	-2.298	0.185	-11.058	2.0e-28	2.3e-26
ENSMUSG00000027985.14	Lef1	5.102	9.125	1.08	-2.283	0.179	-13.444	3.4e-41	7.1e-39
ENSMUSG00000054196.7	Cthrc1	4.939	8.85	1.027	-2.281	0.361	-6.945	3.8e-12	1.1e-10
ENSMUSG00000029377.5	Ereg	6.185	10.916	1.455	-2.279	0.138	-16.275	1.5e-59	6.4e-57
ENSMUSG00000030268.17	Bcat1	10.173	17.518	2.829	-2.274	0.163	-12.834	1.1e-37	1.9e-35
ENSMUSG00000094800.8	Gm9780	7.129	12.462	1.795	-2.268	0.672	-3.615	3.0e-4	0.003
ENSMUSG00000029304.14	Spp1	48.766	81.301	16.232	-2.256	0.121	-13.771	3.8e-43	8.8e-41
ENSMUSG00000027082.15	Tfpi	10.583	18.153	3.012	-2.255	0.175	-11.288	1.5e-29	1.9e-27
ENSMUSG00000007805.4	Twist2	7.508	13.068	1.948	-2.255	0.221	-9.526	1.6e-21	1.2e-19
ENSMUSG00000073599.9	Ecscr	9.828	16.902	2.754	-2.254	0.337	-5.921	3.2e-9	6.6e-8
ENSMUSG00000001131.11	Timp1	333.472	551.632	115.311	-2.248	0.082	-19.564	3.1e-85	3.1e-82
ENSMUSG00000026880.11	Stom	27.509	46.101	8.917	-2.248	0.122	-15.32	5.6e-53	2.0e-50
ENSMUSG00000029371.7	Cxcl5	6.426	11.265	1.586	-2.246	0.238	-9.035	1.6e-19	1.0e-17
ENSMUSG00000059430.14	Actg2	143.081	236.812	49.35	-2.24	0.157	-10.064	8.0e-24	6.9e-22
ENSMUSG00000031825.16	Crispld2	20.55	34.568	6.532	-2.24	0.134	-12.765	2.6e-37	4.5e-35
ENSMUSG00000046676.4	Lce1l	4.216	7.606	0.827	-2.236	0.591	-4.131	3.6e-5	3.8e-4
ENSMUSG00000043099.4	Hic1	8.114	14.035	2.192	-2.236	0.201	-9.232	2.7e-20	1.8e-18
ENSMUSG00000032014.6	Oaf	10.879	18.592	3.166	-2.233	0.166	-12.617	1.7e-36	2.9e-34
ENSMUSG00000032766.9	Gng11	20.259	34.029	6.488	-2.226	0.214	-8.271	1.3e-16	6.4e-15
ENSMUSG00000051851.5	Rtl8c	14.4	24.338	4.462	-2.214	0.442	-4.026	5.7e-5	5.7e-4
ENSMUSG00000042804.13	Gpr153	4.359	7.817	0.901	-2.213	0.279	-8.957	3.3e-19	2.1e-17
ENSMUSG00000027750.16	Postn	10.19	17.41	2.971	-2.213	0.172	-11.118	1.0e-28	1.2e-26
ENSMUSG00000040405.13	Havcr1	3.237	5.969	0.506	-2.21	0.351	-8.24	1.7e-16	8.2e-15
ENSMUSG00000032327.14	Stra6	11.943	20.283	3.604	-2.209	0.127	-14.465	2.0e-47	5.7e-45
ENSMUSG00000031990.15	Jam3	5.554	9.774	1.335	-2.206	0.195	-11.848	2.2e-32	3.1e-30
ENSMUSG00000004371.14	Il11	12.279	20.817	3.741	-2.202	0.163	-11.913	1.0e-32	1.5e-30
ENSMUSG00000075702.9	Selenom	48.666	80.598	16.734	-2.202	0.156	-10.427	1.9e-25	1.8e-23
ENSMUSG00000005124.10	Wisp1	14.819	24.983	4.654	-2.2	0.327	-5.515	3.5e-8	6.3e-7
ENSMUSG00000056481.6	Cd248	8.004	13.782	2.226	-2.196	0.185	-10.806	3.2e-27	3.4e-25
ENSMUSG00000028583.14	Pdpn	89.059	146.813	31.306	-2.194	0.093	-16.761	4.7e-63	2.2e-60
ENSMUSG00000037411.10	Serpine1	1322.44	2169.84	475.031	-2.189	0.125	-12.472	1.1e-35	1.7e-33
ENSMUSG00000090631.3	Olfr456	4.382	7.817	0.946	-2.18	0.348	-6.789	1.1e-11	3.2e-10
ENSMUSG00000049128.7	Ivl	39.212	64.874	13.549	-2.179	0.176	-9.301	1.4e-20	9.5e-19
ENSMUSG00000032387.15	Rbpms2	9.832	16.72	2.943	-2.168	0.165	-11.122	9.8e-29	1.2e-26
ENSMUSG00000050395.8	Tnfsf15	5.076	8.938	1.214	-2.166	0.207	-10.849	2.0e-27	2.2e-25
ENSMUSG00000114147.1	AC134468.1	1.73	3.459	0	-2.157	1.369	-5.171	2.3e-7	3.7e-6
ENSMUSG00000046259.2	Sprr2h	9.018	15.36	2.676	-2.154	0.367	-5.074	3.9e-7	5.9e-6
ENSMUSG00000060284.7	Sp7	1.745	3.472	0.017	-2.136	1.399	-1.177	0.239	0.563
ENSMUSG00000040990.17	Sh3kbp1	52.263	85.774	18.753	-2.135	0.126	-11.882	1.5e-32	2.1e-30
ENSMUSG00000070436.12	Serpinh1	400.449	652.945	147.953	-2.134	0.085	-17.634	1.3e-69	7.9e-67
ENSMUSG00000024937.14	Ehbp1l1	17.545	29.201	5.889	-2.132	0.12	-14.249	4.6e-46	1.2e-43
ENSMUSG00000069806.5	Cacng7	3.375	6.121	0.628	-2.129	0.282	-9.35	8.8e-21	6.1e-19
ENSMUSG00000069267.2	Hist1h3b	5.172	9.043	1.301	-2.126	0.471	-4.63	3.7e-6	4.7e-5
ENSMUSG00000002020.15	Ltbp2	62.28	101.905	22.655	-2.121	0.298	-5.332	9.7e-8	1.6e-6
ENSMUSG00000026817.14	Ak1	64.349	105.204	23.494	-2.116	0.108	-14.405	4.8e-47	1.3e-44
ENSMUSG00000026872.17	Zeb2	6.956	11.926	1.986	-2.114	0.179	-11.815	3.3e-32	4.5e-30
ENSMUSG00000067929.3	Gm10226	1.654	3.309	0	-2.107	2.372	-1.548	0.122	0.36
ENSMUSG00000000938.11	Hoxa10	6.378	10.957	1.799	-2.095	0.199	-9.909	3.8e-23	3.1e-21
ENSMUSG00000025746.11	Il6	4.062	7.202	0.921	-2.094	0.314	-7.119	1.1e-12	3.5e-11
ENSMUSG00000020155.2	Kcnmb1	3.692	6.602	0.781	-2.094	0.178	-13.637	2.4e-42	5.3e-40
ENSMUSG00000061615.2	Hist1h2ab	7.293	12.437	2.149	-2.093	0.494	-3.823	1.3e-4	0.001
ENSMUSG00000025492.6	Ifitm3	360.325	584.032	136.618	-2.088	0.129	-11.282	1.6e-29	2.0e-27
ENSMUSG00000049511.5	Htr1b	7.779	13.205	2.353	-2.083	0.125	-15.526	2.3e-54	8.8e-52
ENSMUSG00000060568.14	Fam78b	3.142	5.7	0.583	-2.081	0.268	-10.368	3.5e-25	3.2e-23
ENSMUSG00000103592.1	Gm38364	3.12	5.663	0.576	-2.08	2.326	-1.153	0.249	0.577
ENSMUSG00000075425.10	Gm13547	3.459	6.209	0.709	-2.076	1.38	-1.398	0.162	0.438
ENSMUSG00000097829.3	Myadm	6.176	10.598	1.753	-2.075	2.705	-0.761	0.447	0.796
ENSMUSG00000033585.5	Ndn	6.878	11.733	2.023	-2.074	0.164	-11.608	3.7e-31	5.0e-29
ENSMUSG00000078606.8	Gm4070	7.678	13.022	2.335	-2.072	0.191	-13.472	2.3e-41	4.9e-39
ENSMUSG00000020388.12	Pdlim4	16.027	26.493	5.561	-2.067	0.154	-10.382	3.0e-25	2.8e-23
ENSMUSG00000019846.11	Lama4	8.011	13.55	2.473	-2.067	0.131	-14.978	1.0e-50	3.3e-48
ENSMUSG00000040133.2	Gpr176	11.388	18.991	3.785	-2.063	0.137	-12.304	8.6e-35	1.4e-32
ENSMUSG00000029778.12	Adcyap1r1	4.267	7.496	1.039	-2.059	0.175	-12.491	8.4e-36	1.4e-33
ENSMUSG00000047497.10	Adamts12	3.741	6.646	0.836	-2.058	0.172	-13.413	5.1e-41	1.1e-38
ENSMUSG00000111640.1	AC109138.7	1083.89	1748.16	419.626	-2.056	0.111	-12.93	3.0e-38	5.5e-36
ENSMUSG00000037892.13	Pcdh18	3.323	5.964	0.683	-2.049	0.175	-14.594	3.1e-48	8.9e-46
ENSMUSG00000096001.2	2610528A11Rik	3.401	6.084	0.717	-2.045	0.489	-4.923	8.5e-7	1.2e-5
ENSMUSG00000091243.2	Vgll3	38.679	62.796	14.562	-2.035	0.12	-13.234	5.6e-40	1.1e-37
ENSMUSG00000059901.12	Adamts14	2.497	4.62	0.375	-2.031	0.2	-14.985	9.3e-51	3.1e-48
ENSMUSG00000016918.15	Sulf1	5.877	10.047	1.706	-2.029	0.161	-11.714	1.1e-31	1.5e-29
ENSMUSG00000029061.2	Mmp23	6.937	11.741	2.132	-2.024	0.213	-6.92	4.5e-12	1.3e-10
ENSMUSG00000025810.9	Nrp1	25.384	41.35	9.418	-2.023	0.142	-10.631	2.1e-26	2.2e-24
ENSMUSG00000032679.12	Cd59a	15.218	25.009	5.427	-2.017	0.134	-12.278	1.2e-34	1.9e-32
ENSMUSG00000018217.12	Pmp22	85.434	137.576	33.292	-2.015	0.097	-14.192	1.0e-45	2.7e-43
ENSMUSG00000029334.14	Prkg2	5.207	8.949	1.465	-2.013	0.206	-8.427	3.5e-17	1.8e-15
ENSMUSG00000023885.8	Thbs2	6.133	10.431	1.836	-2.011	0.387	-4.913	9.0e-7	1.3e-5
ENSMUSG00000091071.2	1700030C10Rik	3.321	5.923	0.718	-2.011	0.488	-0.345	0.73	0.925
ENSMUSG00000000003.15	Pbsn	4.099	7.17	1.027	-2.011	0.373	-5.592	2.2e-8	4.1e-7
ENSMUSG00000079592.9	C1qtnf5	2.537	4.662	0.412	-2.003	0.488	-6.035	1.6e-9	3.4e-8
ENSMUSG00000020363.6	Gfpt2	4.612	7.983	1.242	-2.003	0.207	-9.985	1.8e-23	1.5e-21
ENSMUSG00000031659.13	Adcy7	5.554	9.487	1.62	-2.001	0.149	-13.25	4.5e-40	9.1e-38
ENSMUSG00000048376.6	F2r	39.168	63.233	15.104	-1.996	0.117	-12.213	2.6e-34	4.0e-32
ENSMUSG00000090084.7	Srpx	4.384	7.608	1.16	-1.994	0.232	-8.898	5.7e-19	3.5e-17
ENSMUSG00000072214.6	Sept5	11.926	19.636	4.215	-1.984	0.154	-10.299	7.1e-25	6.5e-23
ENSMUSG00000022816.11	Fstl1	155.88	249.384	62.377	-1.982	0.098	-13.737	6.1e-43	1.4e-40
ENSMUSG00000035692.6	Isg15	80.732	129.38	32.085	-1.978	0.19	-7.244	4.4e-13	1.5e-11
ENSMUSG00000021556.12	Golm1	17.538	28.565	6.511	-1.977	0.109	-13.577	5.5e-42	1.2e-39
ENSMUSG00000025511.14	Tspan4	37.572	60.515	14.629	-1.977	0.138	-11.008	3.5e-28	4.0e-26
ENSMUSG00000066607.5	6030419C18Rik	10.105	16.705	3.504	-1.975	0.169	-9.357	8.2e-21	5.8e-19
ENSMUSG00000031502.11	Col4a1	323.815	516.641	130.988	-1.972	0.104	-12.374	3.6e-35	5.9e-33
ENSMUSG00000017929.13	B4galt5	21.756	35.241	8.27	-1.967	0.111	-13.718	7.9e-43	1.8e-40
ENSMUSG00000094719.4	Gm5108	1.655	3.226	0.084	-1.963	1.635	-1.45	0.147	0.411
ENSMUSG00000005611.15	Mrvi1	4.821	8.265	1.378	-1.962	0.14	-12.314	7.6e-35	1.2e-32
ENSMUSG00000035799.6	Twist1	4.522	7.788	1.256	-1.961	0.301	-6.675	2.5e-11	6.7e-10
ENSMUSG00000027254.13	Map1a	4.636	7.967	1.304	-1.96	0.119	-19.848	1.1e-87	1.3e-84
ENSMUSG00000032118.16	Fez1	6.808	11.422	2.195	-1.959	0.19	-8.556	1.2e-17	6.4e-16
ENSMUSG00000005087.17	Cd44	86.423	138.069	34.777	-1.959	0.086	-15.157	6.8e-52	2.4e-49
ENSMUSG00000003153.10	Slc2a3	4.708	8.076	1.339	-1.956	0.19	-9.832	8.2e-23	6.6e-21
ENSMUSG00000104864.1	Gm43655	1.439	2.877	0	-1.955	3.447	-0.888	0.375	0.73
ENSMUSG00000028108.15	Ecm1	365.88	582.226	149.533	-1.954	0.109	-12.233	2.1e-34	3.2e-32
ENSMUSG00000102918.1	Pcdhgc3	15.608	25.399	5.817	-1.953	0.092	-15.977	1.8e-57	7.4e-55
ENSMUSG00000033538.13	Casp4	3.096	5.51	0.682	-1.952	0.346	-7.033	2.0e-12	6.2e-11
ENSMUSG00000040584.8	Abcb1a	3.36	5.922	0.798	-1.945	0.201	-12.227	2.2e-34	3.4e-32
ENSMUSG00000043557.15	Mdga1	3.123	5.546	0.7	-1.945	0.233	-10.061	8.2e-24	7.0e-22
ENSMUSG00000116408.1	AL645849.1	1.524	3.008	0.041	-1.945	3.21	-1.762	0.078	0.262
ENSMUSG00000020886.16	Dlg4	15.274	24.831	5.717	-1.943	0.124	-10.013	1.3e-23	1.1e-21
ENSMUSG00000000693.10	Loxl3	7.866	13.071	2.662	-1.942	0.197	-8.627	6.3e-18	3.5e-16
ENSMUSG00000033174.17	Mgll	8.75	14.474	3.027	-1.942	0.133	-12.854	8.2e-38	1.5e-35
ENSMUSG00000032911.6	Cspg4	8.306	13.751	2.861	-1.934	0.142	-11.934	7.9e-33	1.1e-30
ENSMUSG00000022887.9	Masp1	3.177	5.62	0.734	-1.933	0.268	-8.463	2.6e-17	1.4e-15
ENSMUSG00000079415.2	Cntf	3.4	5.972	0.829	-1.931	0.369	-5.805	6.4e-9	1.3e-7
ENSMUSG00000044863.7	Defb36	1.535	3.016	0.054	-1.93	1.448	-3.431	6.0e-4	0.005
ENSMUSG00000034109.15	Golim4	33.481	53.624	13.339	-1.93	0.109	-11.858	2.0e-32	2.8e-30
ENSMUSG00000038135.4	Crygn	2.477	4.506	0.447	-1.928	2.045	-1.342	0.18	0.47
ENSMUSG00000060703.12	Cd302	5.076	8.622	1.53	-1.927	0.258	-7.154	8.4e-13	2.7e-11
ENSMUSG00000000184.12	Ccnd2	44.284	70.709	17.858	-1.927	0.113	-9.743	2.0e-22	1.6e-20
ENSMUSG00000031387.14	Renbp	22.154	35.665	8.643	-1.927	0.142	-10.414	2.1e-25	2.0e-23
ENSMUSG00000026017.13	Carf	9.589	15.763	3.414	-1.925	0.197	-7.042	1.9e-12	5.9e-11
ENSMUSG00000042499.13	Hoxd11	2.296	4.214	0.377	-1.921	0.329	-8.183	2.8e-16	1.3e-14
ENSMUSG00000040852.5	Plekhh2	4.555	7.787	1.324	-1.919	0.172	-11.211	3.6e-29	4.3e-27
ENSMUSG00000022440.9	C1qtnf6	4.837	8.229	1.446	-1.916	0.235	-8.088	6.1e-16	2.8e-14
ENSMUSG00000021806.4	Nid2	3.532	6.164	0.901	-1.914	0.182	-13.802	2.5e-43	5.8e-41
ENSMUSG00000020601.8	Trib2	2.605	4.694	0.516	-1.909	0.23	-11.366	6.2e-30	8.0e-28
ENSMUSG00000006403.13	Adamts4	2.42	4.397	0.442	-1.904	0.218	-12.265	1.4e-34	2.2e-32
ENSMUSG00000031480.15	Thsd1	3.099	5.467	0.731	-1.901	0.218	-10.472	1.2e-25	1.1e-23
ENSMUSG00000021069.17	Pygl	4.253	7.286	1.219	-1.901	0.177	-11.007	3.5e-28	4.0e-26
ENSMUSG00000032584.12	Mst1r	2.199	4.046	0.352	-1.9	0.279	-8.158	3.4e-16	1.6e-14
ENSMUSG00000042312.9	S100a13	17.76	28.591	6.929	-1.9	0.221	-6.423	1.3e-10	3.3e-9
ENSMUSG00000035373.2	Ccl7	3.46	6.035	0.886	-1.9	0.43	-4.884	1.0e-6	1.5e-5
ENSMUSG00000072944.11	Nup62cl	2.895	5.142	0.647	-1.899	0.371	-6.203	5.5e-10	1.3e-8
ENSMUSG00000024501.19	Dpysl3	43.352	68.91	17.794	-1.895	0.115	-11.354	7.1e-30	9.0e-28
ENSMUSG00000028597.11	Gpx7	9.101	14.916	3.286	-1.893	0.188	-7.921	2.4e-15	1.0e-13
ENSMUSG00000072674.10	Plac9b	7.797	12.856	2.738	-1.89	0.303	-6.569	5.0e-11	1.3e-9
ENSMUSG00000038580.13	Sct	2.683	4.8	0.565	-1.89	0.752	-3.343	8.3e-4	0.006
ENSMUSG00000063727.3	Tnfrsf11b	11.265	18.317	4.212	-1.89	0.168	-8.866	7.6e-19	4.6e-17
ENSMUSG00000026536.9	Mnda	5.978	9.983	1.973	-1.885	0.193	-8.804	1.3e-18	7.9e-17
ENSMUSG00000068699.12	Flnc	48.848	77.453	20.243	-1.885	0.097	-13.184	1.1e-39	2.1e-37
ENSMUSG00000034593.16	Myo5a	14.531	23.435	5.626	-1.883	0.114	-10.128	4.2e-24	3.7e-22
ENSMUSG00000056423.7	Uts2b	2.21	4.047	0.373	-1.878	0.752	-3.832	1.3e-4	0.001
ENSMUSG00000067818.6	Myl9	243.279	383.067	103.492	-1.878	0.11	-10.8	3.4e-27	3.6e-25
ENSMUSG00000075014.1	Gm10800	3.471	6.028	0.913	-1.878	0.509	-4.092	4.3e-5	4.4e-4
ENSMUSG00000039787.13	Cercam	15.266	24.561	5.971	-1.875	0.123	-10.388	2.8e-25	2.7e-23
ENSMUSG00000069171.14	Nr2f1	3.392	5.903	0.882	-1.874	0.287	-6.864	6.7e-12	2.0e-10
ENSMUSG00000110525.1	Gm45893	1.331	2.662	0	-1.873	3.431	-0.899	0.369	0.723
ENSMUSG00000027230.9	Creb3l1	19.798	31.659	7.937	-1.87	0.192	-7.206	5.8e-13	1.9e-11
ENSMUSG00000095597.2	Gm6472	16.311	26.18	6.442	-1.869	1.711	-0.887	0.375	0.73
ENSMUSG00000031503.13	Col4a2	173.444	272.744	74.143	-1.865	0.117	-10.531	6.2e-26	6.1e-24
ENSMUSG00000032024.10	Clmp	2.963	5.219	0.707	-1.865	0.194	-10.167	2.8e-24	2.5e-22
ENSMUSG00000074743.4	Thbd	9.049	14.767	3.332	-1.864	0.161	-9.379	6.7e-21	4.7e-19
ENSMUSG00000110344.1	Gm45716	2.764	4.905	0.623	-1.863	0.278	-8.229	1.9e-16	9.0e-15
ENSMUSG00000032625.14	Thsd7a	3.982	6.812	1.152	-1.86	0.131	-14.352	1.0e-46	2.8e-44
ENSMUSG00000026815.14	Gfi1b	1.312	2.625	0	-1.858	1.836	-2.554	0.011	0.055
ENSMUSG00000043472.10	Lce3d	2.597	4.636	0.558	-1.855	0.76	-3.124	0.002	0.012
ENSMUSG00000045680.8	Tcf21	3.192	5.567	0.816	-1.855	0.329	-6.505	7.8e-11	2.0e-9
ENSMUSG00000045868.12	Gvin1	6.034	10.018	2.05	-1.853	0.375	-4.466	8.0e-6	9.5e-5
ENSMUSG00000034997.5	Htr2a	2.35	4.243	0.457	-1.847	0.191	-13.349	1.2e-40	2.4e-38
ENSMUSG00000030666.11	Calcb	2.68	4.76	0.601	-1.847	0.455	-5.179	2.2e-7	3.5e-6
ENSMUSG00000000278.10	Scpep1	40.154	63.394	16.915	-1.846	0.109	-11.621	3.2e-31	4.3e-29
ENSMUSG00000078794.4	Dact3	4.109	6.993	1.225	-1.845	0.27	-6.997	2.6e-12	8.0e-11
ENSMUSG00000020186.7	Csrp2	38.829	61.297	16.361	-1.843	0.182	-6.721	1.8e-11	5.0e-10
ENSMUSG00000036103.8	Colec12	4.678	7.872	1.485	-1.836	0.226	-7.865	3.7e-15	1.5e-13
ENSMUSG00000032487.8	Ptgs2	494.168	772.459	215.877	-1.834	0.117	-10.215	1.7e-24	1.5e-22
ENSMUSG00000038074.16	Fkbp14	6.617	10.895	2.34	-1.832	0.167	-9.242	2.4e-20	1.6e-18
ENSMUSG00000064080.12	Fbln2	64.282	100.926	27.638	-1.832	0.369	-3.611	3.0e-4	0.003
ENSMUSG00000040466.16	Blvrb	30.713	48.51	12.916	-1.831	0.132	-9.626	6.2e-22	4.9e-20
ENSMUSG00000032374.14	Plod2	31.003	48.942	13.063	-1.828	0.089	-14.039	8.9e-45	2.2e-42
ENSMUSG00000024912.5	Fosl1	19.587	31.122	8.052	-1.827	0.14	-9.378	6.7e-21	4.7e-19
ENSMUSG00000061167.9	Rpl15-ps3	181.517	283.695	79.338	-1.825	1.589	-0.746	0.456	0.801
ENSMUSG00000020399.14	Havcr2	3.086	5.374	0.799	-1.825	0.236	-8.933	4.2e-19	2.6e-17
ENSMUSG00000004267.16	Eno2	3.046	5.31	0.783	-1.823	0.264	-8.608	7.4e-18	4.1e-16
ENSMUSG00000002602.16	Axl	227.518	355.267	99.768	-1.822	0.088	-12.372	3.7e-35	5.9e-33
ENSMUSG00000016756.17	Cmah	5.12	8.541	1.7	-1.821	0.14	-10.001	1.5e-23	1.3e-21
ENSMUSG00000089662.1	Gm14057	3.074	5.35	0.798	-1.82	0.651	-3.21	0.001	0.009
ENSMUSG00000020019.4	Ntn4	13.951	22.272	5.63	-1.812	0.163	-8.287	1.2e-16	5.7e-15
ENSMUSG00000035969.15	Rusc2	90.437	141.299	39.575	-1.81	0.115	-8.462	2.6e-17	1.4e-15
ENSMUSG00000026207.16	Speg	8.912	14.425	3.399	-1.81	0.155	-11.062	1.9e-28	2.2e-26
ENSMUSG00000024064.13	Galnt14	5.456	9.047	1.866	-1.809	0.236	-6.987	2.8e-12	8.5e-11
ENSMUSG00000032332.17	Col12a1	41.276	64.725	17.827	-1.804	0.117	-10.1	5.5e-24	4.8e-22
ENSMUSG00000038543.13	BC028528	3.357	5.773	0.942	-1.803	0.436	-4.975	6.5e-7	9.5e-6
ENSMUSG00000090124.7	Ugt1a7c	3.472	5.947	0.996	-1.799	0.264	-7.222	5.1e-13	1.7e-11
ENSMUSG00000047250.13	Ptgs1	18.554	29.379	7.73	-1.799	0.113	-11.474	1.8e-30	2.3e-28
ENSMUSG00000056427.10	Slit3	3.562	6.085	1.039	-1.797	0.191	-9.505	2.0e-21	1.5e-19
ENSMUSG00000049420.9	Tmem200a	2.334	4.175	0.492	-1.794	0.246	-7.894	2.9e-15	1.2e-13
ENSMUSG00000050288.6	Fzd2	11.966	19.127	4.806	-1.794	0.163	-8.357	6.4e-17	3.2e-15
ENSMUSG00000027827.16	Kcnab1	3.148	5.438	0.858	-1.793	0.253	-8.948	3.6e-19	2.2e-17
ENSMUSG00000002732.14	Fkbp7	18.352	29.015	7.69	-1.788	0.225	-6.3	3.0e-10	7.0e-9
ENSMUSG00000034220.7	Gpc1	19.782	31.23	8.333	-1.788	0.153	-8.346	7.0e-17	3.5e-15
ENSMUSG00000066705.7	Fxyd6	14.845	23.575	6.116	-1.788	0.124	-10.412	2.2e-25	2.1e-23
ENSMUSG00000029338.13	Antxr2	9.727	15.636	3.818	-1.788	0.132	-9.834	8.0e-23	6.5e-21
ENSMUSG00000032860.5	P2ry2	9.512	15.293	3.73	-1.784	0.149	-8.832	1.0e-18	6.2e-17
ENSMUSG00000111432.1	Gm47993	1.221	2.443	0	-1.784	3.969	-0.63	0.529	0.858
ENSMUSG00000057967.12	Fgf18	3.17	5.462	0.878	-1.783	0.379	-5.373	7.8e-8	1.3e-6
ENSMUSG00000116358.1	AC161165.4	47.514	74.178	20.851	-1.783	0.747	-1.667	0.095	0.302
ENSMUSG00000033213.16	AA467197	26.953	42.31	11.596	-1.782	0.169	-7.109	1.2e-12	3.7e-11
ENSMUSG00000038203.18	Hoxa13	4.384	7.339	1.429	-1.78	0.197	-8.913	4.9e-19	3.0e-17
ENSMUSG00000020614.13	Fam20a	2.302	4.115	0.49	-1.78	0.321	-7.643	2.1e-14	8.2e-13
ENSMUSG00000013846.10	St3gal1	6.268	10.253	2.283	-1.777	0.146	-8.086	6.2e-16	2.8e-14
ENSMUSG00000018507.16	Trpv2	3.764	6.373	1.154	-1.775	0.257	-7.102	1.2e-12	3.9e-11
ENSMUSG00000055407.14	Map6	31.838	49.803	13.874	-1.772	0.157	-7.705	1.3e-14	5.2e-13
ENSMUSG00000021876.15	Rnase4	31.936	49.949	13.924	-1.771	0.112	-10.708	9.3e-27	9.7e-25
ENSMUSG00000112743.1	AC152453.1	1.207	2.414	0	-1.771	1.268	-6.17	6.8e-10	1.5e-8
ENSMUSG00000026043.18	Col3a1	13.752	21.816	5.687	-1.771	0.177	-8.797	1.4e-18	8.3e-17
ENSMUSG00000022157.8	Mcpt8	4.778	7.929	1.627	-1.765	0.319	-5.171	2.3e-7	3.7e-6
ENSMUSG00000021281.15	Tnfaip2	9.489	15.209	3.769	-1.765	0.194	-6.648	3.0e-11	7.9e-10
ENSMUSG00000028469.15	Npr2	9.016	14.477	3.555	-1.765	0.175	-7.825	5.1e-15	2.1e-13
ENSMUSG00000028641.16	P3h1	24.893	38.998	10.788	-1.763	0.141	-9.09	9.9e-20	6.4e-18
ENSMUSG00000037033.9	Clca3b	17.256	27.2	7.311	-1.763	0.133	-9.413	4.8e-21	3.4e-19
ENSMUSG00000055538.7	Zcchc24	3.665	6.207	1.124	-1.762	0.175	-10.352	4.1e-25	3.8e-23
ENSMUSG00000035107.13	Dcbld2	36.766	57.299	16.233	-1.758	0.113	-10.432	1.8e-25	1.7e-23
ENSMUSG00000044629.5	Cnrip1	2.548	4.473	0.623	-1.754	0.389	-5.831	5.5e-9	1.1e-7
ENSMUSG00000023868.15	Pde10a	2.24	3.997	0.483	-1.752	0.234	-6.648	3.0e-11	7.9e-10
ENSMUSG00000109495.1	Gm47692	20.842	32.677	9.007	-1.751	0.254	-4.601	4.2e-6	5.4e-5
ENSMUSG00000038271.17	Iffo1	3.386	5.759	1.013	-1.748	0.208	-8.398	4.5e-17	2.3e-15
ENSMUSG00000062591.5	Tubb4a	1.932	3.518	0.346	-1.747	0.308	-8.774	1.7e-18	1.0e-16
ENSMUSG00000036782.13	Klhl13	2.748	4.772	0.723	-1.744	0.218	-9.601	7.9e-22	6.1e-20
ENSMUSG00000027994.14	Mcub	13.941	22.004	5.878	-1.742	0.168	-7.065	1.6e-12	5.0e-11
ENSMUSG00000037405.8	Icam1	37.564	58.365	16.763	-1.741	0.112	-10.104	5.3e-24	4.7e-22
ENSMUSG00000111973.1	Gm48827	1.17	2.339	0	-1.74	2.152	-1.845	0.065	0.229
ENSMUSG00000028494.12	Plin2	265.812	409.542	122.082	-1.738	0.109	-10.027	1.2e-23	9.8e-22
ENSMUSG00000021208.9	Ifi27l2b	37.851	58.773	16.929	-1.737	0.151	-7.663	1.8e-14	7.1e-13
ENSMUSG00000056870.9	Gulp1	8.253	13.234	3.272	-1.737	0.166	-8.323	8.6e-17	4.2e-15
ENSMUSG00000030717.9	Nupr1	75.747	117.063	34.431	-1.736	0.12	-9.542	1.4e-21	1.0e-19
ENSMUSG00000073771.11	Btbd19	7.869	12.643	3.096	-1.736	0.211	-6.017	1.8e-9	3.8e-8
ENSMUSG00000040152.8	Thbs1	1036.69	1595.16	478.231	-1.736	0.132	-8.411	4.1e-17	2.1e-15
ENSMUSG00000039497.8	Dse	6.486	10.514	2.459	-1.735	0.126	-11.002	3.7e-28	4.2e-26
ENSMUSG00000106462.1	Gm43725	1.591	2.983	0.198	-1.733	1.561	-2.006	0.045	0.174
ENSMUSG00000018259.13	Prl8a2	4.056	6.773	1.34	-1.732	0.368	-4.538	5.7e-6	7.0e-5
ENSMUSG00000017765.17	Slc12a4	27.091	42.181	12.001	-1.732	0.089	-11.984	4.3e-33	6.3e-31
ENSMUSG00000046768.13	Rhoj	23.361	36.446	10.276	-1.732	0.115	-10.095	5.8e-24	5.0e-22
ENSMUSG00000027848.12	Olfml3	3.973	6.644	1.302	-1.731	0.156	-12.021	2.8e-33	4.1e-31
ENSMUSG00000053192.9	Mllt11	31.587	49.082	14.091	-1.731	0.109	-11.3	1.3e-29	1.6e-27
ENSMUSG00000030605.15	Mfge8	203.048	312.591	93.504	-1.73	0.093	-11.777	5.2e-32	7.1e-30
ENSMUSG00000018906.14	P4ha2	55.195	85.355	25.035	-1.73	0.094	-11.541	8.2e-31	1.1e-28
ENSMUSG00000001473.6	Tubb6	154.968	238.668	71.267	-1.73	0.099	-11.092	1.4e-28	1.6e-26
ENSMUSG00000032085.5	Tagln	1683.7	2587.5	779.895	-1.729	0.084	-12.846	9.1e-38	1.6e-35
ENSMUSG00000035357.16	Pdzrn3	9.949	15.818	4.079	-1.727	0.136	-9.564	1.1e-21	8.5e-20
ENSMUSG00000112613.1	Gm48175	1.153	2.305	0	-1.725	3.985	-0.582	0.56	0.876
ENSMUSG00000103441.1	7530428D23Rik	1.293	2.52	0.065	-1.725	2.376	-0.357	0.721	0.925
ENSMUSG00000022098.10	Bmp1	84.148	129.716	38.58	-1.724	0.115	-9.656	4.7e-22	3.6e-20
ENSMUSG00000050212.4	Eva1b	14.328	22.526	6.13	-1.722	0.202	-6.034	1.6e-9	3.4e-8
ENSMUSG00000022146.12	Osmr	6.682	10.791	2.574	-1.722	0.123	-11.16	6.4e-29	7.6e-27
ENSMUSG00000036256.13	Igfbp7	794.383	1219.63	369.14	-1.721	0.132	-8.276	1.3e-16	6.2e-15
ENSMUSG00000024164.15	C3	15.73	24.673	6.788	-1.721	0.161	-6.508	7.6e-11	1.9e-9
ENSMUSG00000040690.15	Col16a1	21.103	32.916	9.291	-1.721	0.105	-12.508	6.8e-36	1.1e-33
ENSMUSG00000004891.16	Nes	57.808	89.185	26.431	-1.717	0.113	-9.713	2.7e-22	2.1e-20
ENSMUSG00000029223.12	Uchl1	82.687	127.231	38.142	-1.712	0.13	-8.219	2.1e-16	9.8e-15
ENSMUSG00000012017.3	Scarf2	8.96	14.261	3.659	-1.712	0.194	-6.845	7.7e-12	2.2e-10
ENSMUSG00000023191.9	P3h3	9.847	15.618	4.075	-1.711	0.133	-10.05	9.2e-24	7.8e-22
ENSMUSG00000055322.15	Tns1	33.213	51.383	15.043	-1.707	0.149	-4.367	1.3e-5	1.5e-4
ENSMUSG00000005413.8	Hmox1	246.946	378.598	115.294	-1.707	0.107	-10.046	9.6e-24	8.2e-22
ENSMUSG00000053461.9	Hhipl2	1.472	2.782	0.162	-1.703	0.691	-0.904	0.366	0.72
ENSMUSG00000025666.16	Tmem47	8.586	13.658	3.515	-1.699	0.143	-8.78	1.6e-18	9.6e-17
ENSMUSG00000027309.18	4930402H24Rik	24.602	38.136	11.067	-1.697	0.101	-9.391	5.9e-21	4.2e-19
ENSMUSG00000027220.2	Syt13	3.428	5.768	1.089	-1.696	0.184	-9.419	4.5e-21	3.3e-19
ENSMUSG00000014599.10	Csf1	436.589	667.606	205.573	-1.695	0.07	-14.717	5.0e-49	1.5e-46
ENSMUSG00000037660.5	Gdf7	2.653	4.58	0.727	-1.692	0.397	-5	5.7e-7	8.4e-6
ENSMUSG00000004791.7	Pgf	9.019	14.297	3.742	-1.69	0.17	-7.667	1.8e-14	6.9e-13
ENSMUSG00000050138.7	Kcnk12	2.133	3.78	0.485	-1.687	0.429	-5.507	3.7e-8	6.5e-7
ENSMUSG00000019916.14	P4ha1	55.06	84.543	25.578	-1.686	0.099	-10.938	7.6e-28	8.4e-26
ENSMUSG00000028970.9	Abcb1b	5.528	8.955	2.102	-1.682	0.191	-6.814	9.5e-12	2.7e-10
ENSMUSG00000036564.17	Ndrg4	16.007	24.902	7.112	-1.675	0.135	-9.169	4.8e-20	3.1e-18
ENSMUSG00000034714.9	Ttyh2	7.816	12.42	3.211	-1.672	0.152	-8.994	2.4e-19	1.5e-17
ENSMUSG00000113131.1	Gm48290	1.503	2.809	0.196	-1.671	1.459	-2.154	0.031	0.131
ENSMUSG00000028194.15	Ddah1	27.803	42.835	12.772	-1.67	0.107	-10.733	7.1e-27	7.5e-25
ENSMUSG00000058571.11	Gpc6	2.02	3.595	0.444	-1.67	0.346	-7.136	9.6e-13	3.1e-11
ENSMUSG00000034459.8	Ifit1	8.583	13.583	3.584	-1.67	0.206	-6.281	3.4e-10	7.8e-9
ENSMUSG00000081778.1	Gm6325	1.765	3.206	0.324	-1.668	0.337	-7.937	2.1e-15	8.9e-14
ENSMUSG00000029819.6	Npy	3.644	6.061	1.227	-1.665	0.51	-3.178	0.001	0.01
ENSMUSG00000091831.5	Gm4707	4.37	7.164	1.576	-1.664	0.981	-1.235	0.217	0.53
ENSMUSG00000027797.15	Dclk1	4.22	6.935	1.504	-1.664	0.204	-7.879	3.3e-15	1.4e-13
ENSMUSG00000050721.9	Plekho2	15.003	23.326	6.679	-1.663	0.105	-11	3.8e-28	4.3e-26
ENSMUSG00000082361.6	Btc	4.388	7.183	1.592	-1.658	0.171	-8.419	3.8e-17	1.9e-15
ENSMUSG00000031538.6	Plat	10.405	16.321	4.489	-1.658	0.184	-6.715	1.9e-11	5.2e-10
ENSMUSG00000026831.16	1700007K13Rik	10.023	15.738	4.308	-1.657	0.246	-4.82	1.4e-6	2.0e-5
ENSMUSG00000031963.8	Bmper	2.274	3.97	0.578	-1.655	0.277	-7.017	2.3e-12	6.9e-11
ENSMUSG00000027978.9	Prss12	3.161	5.316	1.006	-1.654	0.201	-8.642	5.5e-18	3.1e-16
ENSMUSG00000031872.14	Bean1	2.468	4.263	0.673	-1.654	0.248	-7.629	2.4e-14	9.2e-13
ENSMUSG00000027239.14	Mdk	5.65	9.089	2.21	-1.652	0.31	-4.429	9.5e-6	1.1e-4
ENSMUSG00000051515.9	Fam181b	1.632	2.99	0.275	-1.647	0.37	-7.577	3.5e-14	1.3e-12
ENSMUSG00000095304.9	Plac9	1.825	3.282	0.368	-1.646	1.204	-1.932	0.053	0.197
ENSMUSG00000048332.13	Lhfp	31.883	48.836	14.93	-1.645	0.094	-11.229	2.9e-29	3.6e-27
ENSMUSG00000078922.9	Tgtp1	5.967	9.556	2.378	-1.644	0.18	-7.031	2.0e-12	6.3e-11
ENSMUSG00000047414.6	Flrt2	2.943	4.973	0.913	-1.643	0.276	-6.676	2.5e-11	6.7e-10
ENSMUSG00000028019.9	Pdgfc	15.221	23.564	6.878	-1.641	0.173	-6.467	1.0e-10	2.5e-9
ENSMUSG00000033855.15	Ston1	31.733	48.55	14.915	-1.638	0.093	-12.894	4.9e-38	8.8e-36
ENSMUSG00000024238.14	Zeb1	5.062	8.172	1.952	-1.636	0.152	-12.701	5.8e-37	1.0e-34
ENSMUSG00000020589.17	Fam49a	4.67	7.578	1.763	-1.635	0.132	-11.074	1.7e-28	1.9e-26
ENSMUSG00000000530.16	Acvrl1	10.136	15.846	4.427	-1.634	0.147	-9.293	1.5e-20	1.0e-18
ENSMUSG00000036466.17	Megf11	1.862	3.327	0.396	-1.632	0.295	-7.087	1.4e-12	4.3e-11
ENSMUSG00000024427.6	Spry4	3.166	5.298	1.033	-1.631	0.17	-10.076	7.1e-24	6.1e-22
ENSMUSG00000045027.6	Prss22	40.985	62.449	19.521	-1.629	0.115	-9.035	1.6e-19	1.0e-17
ENSMUSG00000050777.7	Tmem37	5.553	8.902	2.203	-1.628	0.273	-5.101	3.4e-7	5.2e-6
ENSMUSG00000090300.1	Gm17119	1.044	2.088	0	-1.627	3.257	-1.015	0.31	0.655
ENSMUSG00000026480.12	Ncf2	7.246	11.453	3.038	-1.625	0.148	-10.287	8.1e-25	7.4e-23
ENSMUSG00000002603.15	Tgfb1	46.052	70.057	22.046	-1.624	0.158	-6.54	6.2e-11	1.6e-9
ENSMUSG00000023064.4	Sncg	19.526	29.997	9.055	-1.624	0.157	-6.86	6.9e-12	2.0e-10
ENSMUSG00000020689.4	Itgb3	6.365	10.121	2.609	-1.624	0.157	-8.475	2.3e-17	1.2e-15
ENSMUSG00000037784.14	Dzip1l	9.083	14.223	3.943	-1.623	0.15	-6.725	1.8e-11	4.9e-10
ENSMUSG00000022594.14	Lynx1	7.717	12.154	3.28	-1.62	0.125	-8.902	5.5e-19	3.4e-17
ENSMUSG00000032281.11	Acsbg1	4.988	8.032	1.945	-1.617	0.167	-10.437	1.7e-25	1.6e-23
ENSMUSG00000019960.8	Dusp6	18.543	28.469	8.618	-1.615	0.132	-8.802	1.3e-18	7.9e-17
ENSMUSG00000053617.11	Sh3pxd2a	17.93	27.533	8.328	-1.613	0.092	-11.671	1.8e-31	2.4e-29
ENSMUSG00000026840.14	Lamc3	2.096	3.665	0.526	-1.612	0.185	-11.125	9.5e-29	1.1e-26
ENSMUSG00000026637.13	Traf5	9.581	14.944	4.218	-1.612	0.184	-3.447	5.7e-4	0.004
ENSMUSG00000072620.3	Slfn2	21.611	33.059	10.162	-1.609	0.187	-5.712	1.1e-8	2.2e-7
ENSMUSG00000003420.8	Fcgrt	9.09	14.197	3.983	-1.609	0.176	-7.182	6.9e-13	2.2e-11
ENSMUSG00000079442.12	St6galnac4	3.538	5.834	1.241	-1.609	0.207	-7.053	1.8e-12	5.4e-11
ENSMUSG00000015652.9	Steap1	7.477	11.767	3.187	-1.608	0.247	-5.133	2.8e-7	4.4e-6
ENSMUSG00000034675.17	Dbn1	80.785	122.161	39.409	-1.608	0.136	-7.113	1.1e-12	3.6e-11
ENSMUSG00000041548.4	Hspb8	61.789	93.55	30.028	-1.608	0.092	-10.714	8.7e-27	9.1e-25
ENSMUSG00000027611.12	Procr	78.338	118.436	38.241	-1.606	0.113	-8.356	6.5e-17	3.3e-15
ENSMUSG00000032643.12	Fhl3	23.622	36.063	11.18	-1.605	0.14	-7.492	6.8e-14	2.5e-12
ENSMUSG00000022912.8	Pros1	9.053	14.132	3.974	-1.605	0.133	-9.56	1.2e-21	8.9e-20
ENSMUSG00000015134.15	Aldh1a3	8.709	13.603	3.815	-1.601	0.142	-8.559	1.1e-17	6.3e-16
ENSMUSG00000098369.6	Gm2274	1.014	2.027	0	-1.598	3.913	-1.535	0.125	0.367
ENSMUSG00000028364.15	Tnc	314.372	472.975	155.769	-1.596	0.097	-9.777	1.4e-22	1.1e-20
ENSMUSG00000039385.5	Cdh6	2.161	3.749	0.573	-1.594	0.22	-9.462	3.0e-21	2.2e-19
ENSMUSG00000029561.17	Oasl2	24.051	36.625	11.476	-1.592	0.156	-6.163	7.1e-10	1.6e-8
ENSMUSG00000039316.14	Rftn1	6.964	10.962	2.967	-1.592	0.164	-7.216	5.3e-13	1.8e-11
ENSMUSG00000083285.2	Gm15815	74.05	111.717	36.383	-1.592	0.339	-2.8	0.005	0.03
ENSMUSG00000023336.6	Wfdc1	2.987	4.987	0.987	-1.591	0.317	-5.161	2.5e-7	3.8e-6
ENSMUSG00000030782.16	Tgfb1i1	62.365	94.147	30.584	-1.591	0.104	-9.213	3.2e-20	2.1e-18
ENSMUSG00000047632.10	Fgfbp3	3.474	5.718	1.23	-1.591	0.24	-6.54	6.2e-11	1.6e-9
ENSMUSG00000021186.9	Fbln5	31.335	47.541	15.129	-1.59	0.153	-6.575	4.9e-11	1.3e-9
ENSMUSG00000019823.17	Mical1	11.376	17.573	5.179	-1.588	0.128	-8.217	2.1e-16	9.9e-15
ENSMUSG00000021464.14	Ror2	2.268	3.902	0.633	-1.586	0.247	-8.029	9.8e-16	4.4e-14
ENSMUSG00000032011.5	Thy1	56.569	85.291	27.848	-1.581	0.121	-8.119	4.7e-16	2.2e-14
ENSMUSG00000032714.6	Syde1	16.303	24.935	7.671	-1.581	0.11	-9.608	7.4e-22	5.7e-20
ENSMUSG00000033256.14	Shf	12.552	19.309	5.794	-1.58	0.212	-5.647	1.6e-8	3.1e-7
ENSMUSG00000036036.15	Zfp57	5.473	8.7	2.247	-1.579	0.219	-6.423	1.3e-10	3.3e-9
ENSMUSG00000103423.1	Gm5845	46.073	69.519	22.628	-1.578	0.157	-6.008	1.9e-9	4.0e-8
ENSMUSG00000023263.3	9530002B09Rik	1.499	2.743	0.255	-1.576	0.709	-3.793	1.5e-4	0.001
ENSMUSG00000116522.1	LT629153.6	6.625	10.421	2.83	-1.576	1.055	-1.2	0.23	0.55
ENSMUSG00000037071.2	Scd1	8.111	12.644	3.577	-1.576	0.123	-9.406	5.1e-21	3.7e-19
ENSMUSG00000023886.9	Smoc2	11.96	18.407	5.514	-1.575	0.141	-7.677	1.6e-14	6.4e-13
ENSMUSG00000095465.2	Gm6214	4.924	7.867	1.98	-1.573	0.492	-2.751	0.006	0.034
ENSMUSG00000027912.8	Lce1m	1.096	2.136	0.055	-1.572	1.561	-1.554	0.12	0.358
ENSMUSG00000028680.14	Plk3	9.493	14.7	4.286	-1.57	0.144	-7.855	4.0e-15	1.7e-13
ENSMUSG00000025498.15	Irf7	22.488	34.141	10.834	-1.57	0.186	-5.273	1.3e-7	2.2e-6
ENSMUSG00000017724.14	Etv4	24.442	37.059	11.825	-1.569	0.112	-7.869	3.6e-15	1.5e-13
ENSMUSG00000031290.14	Lrch2	2.44	4.145	0.734	-1.569	0.206	-8.344	7.2e-17	3.6e-15
ENSMUSG00000028937.14	Acot7	87.047	130.693	43.402	-1.568	0.102	-9.232	2.7e-20	1.8e-18
ENSMUSG00000068964.5	Gm6361	17.838	27.172	8.504	-1.568	1.403	-0.844	0.399	0.752
ENSMUSG00000029108.14	Pcdh7	11.32	17.419	5.22	-1.566	0.104	-10.561	4.5e-26	4.5e-24
ENSMUSG00000002057.4	Foxn1	8.049	12.527	3.571	-1.565	0.135	-8.514	1.7e-17	9.1e-16
ENSMUSG00000104876.1	Trdc	2.01	3.5	0.521	-1.565	0.226	-9.17	4.7e-20	3.1e-18
ENSMUSG00000086882.4	Gm13352	0.977	1.953	0	-1.562	3.167	-0.897	0.37	0.724
ENSMUSG00000031827.13	Cotl1	49.142	73.91	24.373	-1.562	0.12	-7.496	6.6e-14	2.5e-12
ENSMUSG00000029372.7	Ppbp	123.527	185.03	62.025	-1.562	0.096	-9.603	7.8e-22	6.0e-20
ENSMUSG00000027514.14	Zbp1	2.565	4.325	0.804	-1.561	0.384	-4.832	1.4e-6	1.9e-5
ENSMUSG00000089945.13	Pakap	5.538	8.766	2.31	-1.561	0.435	-2.846	0.004	0.026
ENSMUSG00000020674.17	Pxdn	26.304	39.759	12.849	-1.557	0.117	-8.459	2.7e-17	1.4e-15
ENSMUSG00000083941.1	Gm12889	1.708	3.042	0.374	-1.556	2.783	-0.843	0.399	0.753
ENSMUSG00000049593.8	Lce1h	84.367	126.358	42.375	-1.554	0.134	-6.996	2.6e-12	8.0e-11
ENSMUSG00000028251.5	Tstd3	4.887	7.782	1.991	-1.554	0.231	-5.663	1.5e-8	2.8e-7
ENSMUSG00000049288.4	Lix1l	5.891	9.28	2.502	-1.553	0.145	-8.972	2.9e-19	1.8e-17
ENSMUSG00000022894.5	Adamts5	4.899	7.8	1.999	-1.553	0.21	-6.44	1.2e-10	2.9e-9
ENSMUSG00000090523.2	Gypc	7.91	12.289	3.53	-1.553	0.166	-6.803	1.0e-11	2.9e-10
ENSMUSG00000039476.13	Prrx2	3.937	6.363	1.511	-1.552	0.424	-3.909	9.3e-5	8.9e-4
ENSMUSG00000035863.14	Palm	13.038	19.933	6.143	-1.551	0.146	-6.814	9.5e-12	2.7e-10
ENSMUSG00000040483.15	Xaf1	34.43	51.831	17.028	-1.551	0.162	-4.998	5.8e-7	8.5e-6
ENSMUSG00000094845.1	Tmem95	4.111	6.615	1.607	-1.546	0.485	-2.819	0.005	0.028
ENSMUSG00000111478.1	AC150314.1	0.96	1.92	0	-1.546	3.969	-0.63	0.529	0.858
ENSMUSG00000042258.13	Isl1	3.377	5.521	1.234	-1.546	0.242	-7.468	8.2e-14	3.0e-12
ENSMUSG00000016194.14	Hsd11b1	3.202	5.259	1.144	-1.545	0.321	-4.743	2.1e-6	2.8e-5
ENSMUSG00000017652.16	Cd40	23.392	35.325	11.459	-1.544	0.127	-7.667	1.8e-14	6.9e-13
ENSMUSG00000022156.8	Gzme	1.867	3.269	0.465	-1.543	0.549	-3.922	8.8e-5	8.5e-4
ENSMUSG00000068246.6	Apol9b	18.551	28.113	8.989	-1.543	0.168	-5.942	2.8e-9	5.8e-8
ENSMUSG00000032194.9	Kank2	13.899	21.176	6.621	-1.541	0.118	-8.895	5.8e-19	3.5e-17
ENSMUSG00000034765.6	Dusp5	24.404	36.799	12.009	-1.539	0.119	-8.062	7.5e-16	3.4e-14
ENSMUSG00000056121.15	Fez2	41.628	62.416	20.839	-1.538	0.104	-9.046	1.5e-19	9.5e-18
ENSMUSG00000041482.16	Piezo2	2.932	4.849	1.015	-1.537	0.191	-9.464	3.0e-21	2.2e-19
ENSMUSG00000036545.8	Adamts2	2.542	4.267	0.816	-1.536	0.152	-11.23	2.9e-29	3.5e-27
ENSMUSG00000008136.14	Fhl2	62.655	93.665	31.646	-1.536	0.096	-9.495	2.2e-21	1.6e-19
ENSMUSG00000032640.10	Chsy1	7.672	11.894	3.45	-1.535	0.154	-7.423	1.1e-13	4.2e-12
ENSMUSG00000026335.16	Pam	20.28	30.614	9.947	-1.53	0.145	-6.404	1.5e-10	3.7e-9
ENSMUSG00000041120.6	Nbl1	83.926	125.106	42.746	-1.527	0.095	-9.322	1.1e-20	7.8e-19
ENSMUSG00000035934.16	Pknox2	2.816	4.666	0.966	-1.527	0.22	-8.592	8.6e-18	4.7e-16
ENSMUSG00000026749.11	Nek6	6.261	9.781	2.741	-1.527	0.175	-6.647	3.0e-11	8.0e-10
ENSMUSG00000003849.8	Nqo1	15.772	23.899	7.646	-1.526	0.166	-6.051	1.4e-9	3.1e-8
ENSMUSG00000103930.1	Gm36961	0.935	1.871	0	-1.521	3.746	-0.579	0.563	0.877
ENSMUSG00000039542.16	Ncam1	22.575	33.967	11.183	-1.521	0.126	-7.055	1.7e-12	5.4e-11
ENSMUSG00000021070.6	Bdkrb2	5.676	8.898	2.454	-1.519	0.151	-7.98	1.5e-15	6.4e-14
ENSMUSG00000091230.1	Gm6970	1.703	3.007	0.398	-1.519	0.749	-2.916	0.004	0.022
ENSMUSG00000046731.4	Kctd11	25.275	37.949	12.601	-1.518	0.093	-10.117	4.7e-24	4.1e-22
ENSMUSG00000021196.14	Pfkp	20.774	31.276	10.272	-1.518	0.095	-9.42	4.5e-21	3.3e-19
ENSMUSG00000031780.2	Ccl17	1.2	2.261	0.139	-1.517	1.154	-2.919	0.004	0.021
ENSMUSG00000038402.2	Foxf2	1.84	3.209	0.472	-1.516	0.344	-6.254	4.0e-10	9.2e-9
ENSMUSG00000037855.15	Zfp365	4.088	6.538	1.637	-1.515	0.16	-8.45	2.9e-17	1.5e-15
ENSMUSG00000030352.14	Tspan9	75.028	111.612	38.444	-1.513	0.103	-7.505	6.2e-14	2.3e-12
ENSMUSG00000017446.14	C1qtnf1	3.81	6.117	1.502	-1.509	0.251	-4.105	4.0e-5	4.2e-4
ENSMUSG00000081679.1	Gm11874	2.859	4.711	1.007	-1.508	1.909	-0.912	0.362	0.716
ENSMUSG00000055210.4	Foxd2	1.677	2.962	0.393	-1.508	0.349	-6.568	5.1e-11	1.3e-9
ENSMUSG00000017466.9	Timp2	150.688	223.448	77.929	-1.508	0.143	-4.875	1.1e-6	1.5e-5
ENSMUSG00000044646.14	Zbtb7c	5.033	7.923	2.143	-1.506	0.159	-8.278	1.3e-16	6.1e-15
ENSMUSG00000074896.3	Ifit3	9.92	15.145	4.695	-1.503	0.197	-5.197	2.0e-7	3.2e-6
ENSMUSG00000035274.13	Tpbg	14.682	22.185	7.179	-1.503	0.152	-4.976	6.5e-7	9.4e-6
ENSMUSG00000075012.4	Fjx1	8.914	13.651	4.178	-1.5	0.154	-6.941	3.9e-12	1.2e-10
ENSMUSG00000068614.7	Actc1	8.862	13.573	4.152	-1.5	0.284	-3.523	4.3e-4	0.003
ENSMUSG00000028282.12	Casp8ap2	6.393	9.922	2.864	-1.499	0.13	-1.22	0.223	0.538
ENSMUSG00000026811.18	St6galnac6	7.623	11.739	3.508	-1.499	0.191	-5.15	2.6e-7	4.1e-6
ENSMUSG00000027087.11	Itgav	87	128.992	45.008	-1.498	0.094	-8.354	6.6e-17	3.3e-15
ENSMUSG00000085795.8	Zfp703	30.937	46.16	15.715	-1.496	0.133	-6.493	8.4e-11	2.1e-9
ENSMUSG00000044211.9	Gm7887	17.584	26.424	8.744	-1.493	0.347	-2.841	0.004	0.027
ENSMUSG00000071470.4	Ccnb1ip1	8.865	13.557	4.172	-1.493	0.39	-2.684	0.007	0.04
ENSMUSG00000033361.13	Prrg3	4.542	7.177	1.906	-1.493	0.169	-2.359	0.018	0.085
ENSMUSG00000028763.17	Hspg2	71.673	106.23	37.116	-1.492	0.12	-7.888	3.1e-15	1.3e-13
ENSMUSG00000026208.9	Des	40.693	60.505	20.881	-1.491	0.163	-5.115	3.1e-7	4.8e-6
ENSMUSG00000001270.9	Ckb	73.814	109.313	38.315	-1.488	0.133	-6.586	4.5e-11	1.2e-9
ENSMUSG00000038807.18	Rap1gap2	3.915	6.246	1.584	-1.488	0.155	-9.409	5.0e-21	3.6e-19
ENSMUSG00000045106.12	Ccdc73	3.496	5.628	1.365	-1.487	0.593	-0.455	0.649	0.914
ENSMUSG00000078636.4	Gm7336	7.492	11.519	3.466	-1.487	0.22	-4.835	1.3e-6	1.8e-5
ENSMUSG00000040613.14	Apobec1	39.166	58.209	20.123	-1.487	0.13	-6.041	1.5e-9	3.3e-8
ENSMUSG00000098557.1	Kctd12	5.705	8.884	2.527	-1.487	0.119	-9.712	2.7e-22	2.1e-20
ENSMUSG00000026827.12	Gpd2	14.335	21.598	7.072	-1.485	0.091	-9.398	5.6e-21	3.9e-19
ENSMUSG00000039405.7	Prss23	245.708	362.458	128.959	-1.484	0.125	-6.717	1.9e-11	5.1e-10
ENSMUSG00000042331.13	Specc1	25.839	38.52	13.157	-1.481	0.113	-6.959	3.4e-12	1.0e-10
ENSMUSG00000033880.11	Lgals3bp	89.752	132.625	46.878	-1.481	0.129	-6.986	2.8e-12	8.5e-11
ENSMUSG00000034855.13	Cxcl10	13.323	20.087	6.558	-1.48	0.171	-5.653	1.6e-8	3.0e-7
ENSMUSG00000081249.3	Gm11517	1.396	2.527	0.265	-1.479	1.342	-1.929	0.054	0.198
ENSMUSG00000024909.14	Efemp2	85.368	126.103	44.634	-1.478	0.104	-8.72	2.8e-18	1.6e-16
ENSMUSG00000043943.14	Naalad2	1.762	3.064	0.46	-1.478	0.321	-6.256	3.9e-10	9.1e-9
ENSMUSG00000027560.4	Dok5	1.825	3.157	0.493	-1.477	0.35	-5.86	4.6e-9	9.4e-8
ENSMUSG00000028268.14	Gbp3	6.134	9.497	2.77	-1.477	0.204	-7.414	1.2e-13	4.4e-12
ENSMUSG00000031189.12	Aff2	2.368	3.956	0.78	-1.477	0.234	-5.672	1.4e-8	2.7e-7
ENSMUSG00000035638.14	Muc20	4.864	7.627	2.1	-1.476	0.193	-6.269	3.6e-10	8.4e-9
ENSMUSG00000028347.14	Tmeff1	59.806	88.398	31.213	-1.473	0.117	-7.414	1.2e-13	4.4e-12
ENSMUSG00000030468.12	Siglecg	7.44	11.408	3.471	-1.473	0.177	-8.153	3.6e-16	1.7e-14
ENSMUSG00000030208.15	Emp1	26.531	39.466	13.595	-1.471	0.142	-6.452	1.1e-10	2.7e-9
ENSMUSG00000042808.8	Gpx2	6.838	10.521	3.156	-1.471	0.266	-3.915	9.0e-5	8.7e-4
ENSMUSG00000063605.5	Ccdc102a	5.825	9.031	2.62	-1.471	0.191	-6.006	1.9e-9	4.0e-8
ENSMUSG00000053113.3	Socs3	4.299	6.787	1.81	-1.471	0.202	-6.104	1.0e-9	2.3e-8
ENSMUSG00000017491.9	Rarb	9.873	14.973	4.774	-1.468	0.117	-8.021	1.1e-15	4.7e-14
ENSMUSG00000035783.8	Acta2	1261.05	1852.59	669.505	-1.467	0.103	-8.037	9.2e-16	4.1e-14
ENSMUSG00000048537.16	Phldb1	70.326	103.697	36.955	-1.464	0.114	-7.311	2.6e-13	9.1e-12
ENSMUSG00000074364.6	Ehd2	48.965	72.331	25.599	-1.463	0.103	-8.148	3.7e-16	1.7e-14
ENSMUSG00000029659.16	Medag	3.831	6.089	1.573	-1.462	0.186	-7.352	2.0e-13	6.8e-12
ENSMUSG00000055172.10	C1ra	3.514	5.623	1.405	-1.461	0.196	-6.828	8.6e-12	2.5e-10
ENSMUSG00000001025.8	S100a6	1976.08	2898.89	1053.28	-1.46	0.101	-8.072	6.9e-16	3.1e-14
ENSMUSG00000001333.9	Sync	4.519	7.094	1.944	-1.459	0.201	-6.089	1.1e-9	2.5e-8
ENSMUSG00000053626.5	Tll1	6.928	10.623	3.232	-1.457	0.171	-6.358	2.0e-10	4.9e-9
ENSMUSG00000046711.15	Hmga1	126.298	185.539	67.057	-1.455	0.086	-9.613	7.0e-22	5.5e-20
ENSMUSG00000050953.10	Gja1	24.4	36.22	12.581	-1.455	0.101	-8.548	1.3e-17	6.8e-16
ENSMUSG00000015957.12	Wnt11	19.391	28.878	9.903	-1.454	0.166	-5.809	6.3e-9	1.3e-7
ENSMUSG00000032372.14	Plscr2	37.87	55.94	19.8	-1.453	0.119	-7.22	5.2e-13	1.7e-11
ENSMUSG00000034394.14	Lif	57.516	84.691	30.341	-1.451	0.102	-7.408	1.3e-13	4.6e-12
ENSMUSG00000025475.17	Adgra1	4.708	7.359	2.058	-1.451	0.233	-5.724	1.0e-8	2.0e-7
ENSMUSG00000025964.15	Adam23	1.725	2.989	0.461	-1.449	0.315	-6.823	8.9e-12	2.6e-10
ENSMUSG00000058914.12	C1qtnf3	1.409	2.526	0.293	-1.447	0.377	-6.395	1.6e-10	3.9e-9
ENSMUSG00000020250.10	Txnrd1	167.792	245.81	89.773	-1.443	0.09	-8.623	6.5e-18	3.6e-16
ENSMUSG00000041779.5	Tram2	4.681	7.306	2.055	-1.443	0.139	-8.511	1.7e-17	9.3e-16
ENSMUSG00000032257.6	Ankk1	10.426	15.704	5.147	-1.442	0.145	-6.966	3.3e-12	9.8e-11
ENSMUSG00000026069.15	Il1rl1	27.447	40.589	14.304	-1.442	0.14	-6.335	2.4e-10	5.7e-9
ENSMUSG00000036402.13	Gng12	107.946	158.276	57.616	-1.442	0.102	-5.945	2.8e-9	5.8e-8
ENSMUSG00000004558.15	Ndrg2	7.416	11.303	3.529	-1.442	0.19	-4.069	4.7e-5	4.8e-4
ENSMUSG00000105644.1	Gm19739	0.858	1.715	0	-1.441	4.024	-0.429	0.668	0.92
ENSMUSG00000042182.16	Bend6	1.469	2.609	0.33	-1.44	0.42	-3.493	4.8e-4	0.004
ENSMUSG00000031103.12	Elf4	5.735	8.842	2.628	-1.44	0.114	-9.436	3.9e-21	2.8e-19
ENSMUSG00000046718.8	Bst2	262.585	384.081	141.088	-1.438	0.146	-5.539	3.0e-8	5.5e-7
ENSMUSG00000040511.14	Pvr	35.174	51.842	18.506	-1.438	0.117	-7.125	1.0e-12	3.4e-11
ENSMUSG00000030748.9	Il4ra	15.769	23.494	8.044	-1.437	0.114	-7.917	2.4e-15	1.0e-13
ENSMUSG00000057346.12	Apol9a	9.653	14.56	4.746	-1.437	0.17	-6.023	1.7e-9	3.7e-8
ENSMUSG00000001986.16	Gria3	5.556	8.576	2.537	-1.437	0.141	-6.86	6.9e-12	2.0e-10
ENSMUSG00000116239.1	AC118227.1	0.852	1.703	0	-1.435	3.77	-0.568	0.57	0.877
ENSMUSG00000059248.13	Sept9	71.872	105.377	38.368	-1.434	0.095	-8.457	2.7e-17	1.4e-15
ENSMUSG00000082593.1	Gm11331	3.154	5.063	1.244	-1.434	1.298	-1.145	0.252	0.58
ENSMUSG00000068744.12	Psrc1	15.989	23.799	8.179	-1.434	0.147	-5.524	3.3e-8	5.9e-7
ENSMUSG00000023224.12	Serping1	5.223	8.084	2.363	-1.434	0.263	-3.926	8.6e-5	8.3e-4
ENSMUSG00000055737.12	Ghr	18.808	27.908	9.708	-1.433	0.181	-4.976	6.5e-7	9.4e-6
ENSMUSG00000061751.15	Kalrn	9.668	14.568	4.768	-1.432	0.173	-5.929	3.1e-9	6.3e-8
ENSMUSG00000116516.1	AC102262.1	0.849	1.698	0	-1.432	3.843	-0.54	0.59	0.884
ENSMUSG00000021871.19	Pnp	29.797	43.938	15.657	-1.432	0.238	-3.614	3.0e-4	0.003
ENSMUSG00000042109.8	Csdc2	2.975	4.799	1.15	-1.431	0.23	-5.858	4.7e-9	9.5e-8
ENSMUSG00000056900.13	Usp13	1.188	2.191	0.185	-1.43	0.364	-7.08	1.4e-12	4.5e-11
ENSMUSG00000040998.18	Npnt	11.586	17.349	5.822	-1.427	0.113	-7.96	1.7e-15	7.4e-14
ENSMUSG00000022575.5	Gsdmd	6.778	10.339	3.217	-1.427	0.226	-7.334	2.2e-13	7.7e-12
ENSMUSG00000075284.10	Wipf1	9.328	14.055	4.6	-1.427	0.111	-7.611	2.7e-14	1.0e-12
ENSMUSG00000014602.15	Kif1a	18.553	27.502	9.605	-1.426	0.088	-9.477	2.6e-21	1.9e-19
ENSMUSG00000042961.13	Egflam	1.626	2.827	0.424	-1.426	0.276	-9.523	1.7e-21	1.2e-19
ENSMUSG00000037712.16	Fermt2	77.406	113.274	41.537	-1.426	0.09	-8.446	3.0e-17	1.6e-15
ENSMUSG00000024087.3	Cyp1b1	8.186	12.388	3.984	-1.426	0.491	-2.125	0.034	0.139
ENSMUSG00000028037.13	Ifi44	21.111	31.224	10.998	-1.425	0.162	-4.867	1.1e-6	1.6e-5
ENSMUSG00000024899.6	Papss2	7.285	11.072	3.497	-1.425	0.146	-7.05	1.8e-12	5.5e-11
ENSMUSG00000024907.6	Gal	2.238	3.717	0.759	-1.423	0.555	-2.87	0.004	0.025
ENSMUSG00000057530.14	Ece1	28.856	42.493	15.22	-1.423	0.119	-7.02	2.2e-12	6.8e-11
ENSMUSG00000098404.1	Mrip-ps	14.828	22.052	7.603	-1.422	0.215	-4.216	2.5e-5	2.7e-4
ENSMUSG00000035042.2	Ccl5	24.663	36.374	12.951	-1.422	0.214	-3.837	1.2e-4	0.001
ENSMUSG00000069266.5	Hist1h4b	12.108	18.09	6.126	-1.422	0.399	-2.318	0.02	0.093
ENSMUSG00000035109.14	Shc4	2.031	3.413	0.648	-1.421	0.209	-9.038	1.6e-19	1.0e-17
ENSMUSG00000000552.10	Zfp385a	14.37	21.38	7.359	-1.421	0.131	-6.783	1.2e-11	3.3e-10
ENSMUSG00000032431.6	Crtap	31.574	46.421	16.726	-1.42	0.135	-6.853	7.2e-12	2.1e-10
ENSMUSG00000033420.12	Antxr1	2.145	3.577	0.712	-1.418	0.195	-8.92	4.7e-19	2.9e-17
ENSMUSG00000022324.15	Matn2	3.9	6.129	1.671	-1.416	0.201	-5.814	6.1e-9	1.2e-7
ENSMUSG00000022883.10	Robo1	2.776	4.493	1.058	-1.416	0.197	-7.401	1.4e-13	4.9e-12
ENSMUSG00000033581.16	Igf2bp2	7.772	11.759	3.785	-1.415	0.125	-7.391	1.5e-13	5.2e-12
ENSMUSG00000057335.11	Cep170	15.828	23.472	8.183	-1.414	0.116	-8.008	1.2e-15	5.1e-14
ENSMUSG00000041287.5	Sox15	4.853	7.51	2.196	-1.413	0.32	-3.484	4.9e-4	0.004
ENSMUSG00000024486.5	Hbegf	49.959	73.08	26.838	-1.412	0.109	-7.427	1.1e-13	4.0e-12
ENSMUSG00000015980.14	Lrrc27	16.89	25.005	8.774	-1.412	0.189	-3.451	5.6e-4	0.004
ENSMUSG00000076441.9	Ass1	119.908	174.742	65.074	-1.411	0.092	-8.486	2.1e-17	1.1e-15
ENSMUSG00000046841.5	Ckap4	76.925	112.261	41.59	-1.411	0.105	-7.239	4.5e-13	1.5e-11
ENSMUSG00000007655.16	Cav1	105.775	154.183	57.367	-1.411	0.13	-5.157	2.5e-7	3.9e-6
ENSMUSG00000061878.15	Sphk1	18.957	28.004	9.91	-1.411	0.109	-8.079	6.5e-16	3.0e-14
ENSMUSG00000032436.17	Cmtm7	43.18	63.206	23.154	-1.41	0.125	-6.295	3.1e-10	7.2e-9
ENSMUSG00000042751.14	Nmnat2	2.565	4.179	0.95	-1.41	0.22	-8.88	6.7e-19	4.1e-17
ENSMUSG00000001870.15	Ltbp1	11.146	16.647	5.646	-1.409	0.172	-5.223	1.8e-7	2.8e-6
ENSMUSG00000078640.9	Gm11627	1.72	2.951	0.489	-1.408	0.693	-2.185	0.029	0.123
ENSMUSG00000110528.1	Gm1943	0.827	1.653	0	-1.408	4.001	-0.512	0.609	0.888
ENSMUSG00000003283.14	Hck	5.704	8.737	2.671	-1.407	0.235	-4.673	3.0e-6	3.9e-5
ENSMUSG00000001864.13	Aif1l	85.347	124.396	46.299	-1.407	0.095	-7.453	9.1e-14	3.4e-12
ENSMUSG00000044906.5	4930503L19Rik	3.455	5.47	1.441	-1.407	0.214	-5.678	1.4e-8	2.6e-7
ENSMUSG00000047746.14	Fbxo40	3.35	5.316	1.384	-1.406	0.167	-5.869	4.4e-9	8.9e-8
ENSMUSG00000063594.5	Gng8	1.515	2.65	0.379	-1.404	0.756	-3.145	0.002	0.011
ENSMUSG00000026981.15	Il1rn	3.963	6.203	1.723	-1.403	0.325	-1.982	0.047	0.181
ENSMUSG00000044948.16	Cfap43	13.472	19.999	6.944	-1.402	0.121	-7.355	1.9e-13	6.7e-12
ENSMUSG00000052516.18	Robo2	1.283	2.313	0.253	-1.402	0.286	-7.864	3.7e-15	1.5e-13
ENSMUSG00000022607.16	Ptk2	80.401	117.095	43.708	-1.401	0.088	-5.048	4.5e-7	6.7e-6
ENSMUSG00000038034.15	Igsf8	25.947	38.091	13.803	-1.401	0.105	-7.286	3.2e-13	1.1e-11
ENSMUSG00000031367.15	Ap1s2	10.388	15.513	5.262	-1.399	0.134	-6.256	3.9e-10	9.1e-9
ENSMUSG00000058427.10	Cxcl2	7.426	11.217	3.634	-1.399	0.27	-5.338	9.4e-8	1.6e-6
ENSMUSG00000024063.12	Lbh	41.837	61.11	22.564	-1.398	0.099	-7.927	2.2e-15	9.6e-14
ENSMUSG00000020122.16	Egfr	48.76	71.129	26.391	-1.397	0.089	-7.394	1.4e-13	5.1e-12
ENSMUSG00000031207.16	Msn	280.164	406.306	154.023	-1.394	0.095	-8.044	8.7e-16	3.9e-14
ENSMUSG00000062661.6	Ncs1	15.627	23.083	8.17	-1.393	0.132	-6.568	5.1e-11	1.3e-9
ENSMUSG00000006205.13	Htra1	122.409	177.741	67.077	-1.393	0.144	-5.408	6.4e-8	1.1e-6
ENSMUSG00000107272.1	Gm34583	1.148	2.111	0.185	-1.392	1.299	-2.263	0.024	0.105
ENSMUSG00000030220.13	Arhgdib	28.406	41.583	15.229	-1.392	0.13	-5.298	1.2e-7	1.9e-6
ENSMUSG00000022246.14	Rai14	20.25	29.759	10.741	-1.39	0.114	-7.081	1.4e-12	4.5e-11
ENSMUSG00000031523.16	Dlc1	11.031	16.414	5.648	-1.389	0.13	-6.868	6.5e-12	1.9e-10
ENSMUSG00000058056.16	Palld	104.013	150.974	57.052	-1.388	0.112	-6.947	3.7e-12	1.1e-10
ENSMUSG00000044165.12	Bcl2l15	21.56	31.645	11.475	-1.388	0.175	-4.02	5.8e-5	5.8e-4
ENSMUSG00000015305.6	Sash1	8.785	13.158	4.412	-1.387	0.121	-6.08	1.2e-9	2.6e-8
ENSMUSG00000032322.14	Pstpip1	10.359	15.435	5.283	-1.387	0.173	-5.7	1.2e-8	2.3e-7
ENSMUSG00000028262.13	Clca3a2	9.123	13.646	4.601	-1.387	0.212	-4.626	3.7e-6	4.8e-5
ENSMUSG00000016256.10	Ctsz	93.77	136.096	51.445	-1.386	0.094	-8.067	7.2e-16	3.2e-14
ENSMUSG00000053477.16	Tcf4	11.634	17.274	5.993	-1.386	0.104	-7.055	1.7e-12	5.4e-11
ENSMUSG00000106964.5	FO907130.1	5.446	8.324	2.568	-1.386	1.55	-0.602	0.547	0.869
ENSMUSG00000022548.14	Apod	2.428	3.958	0.898	-1.385	0.44	-2.51	0.012	0.061
ENSMUSG00000032009.8	Sesn3	19.611	28.809	10.413	-1.385	0.126	-2.451	0.014	0.069
ENSMUSG00000030562.17	Nox4	12.061	17.886	6.236	-1.384	0.174	-4.752	2.0e-6	2.7e-5
ENSMUSG00000030000.10	Add2	1.75	2.977	0.524	-1.384	0.243	-7.424	1.1e-13	4.1e-12
ENSMUSG00000040473.15	Cfap69	1.824	3.084	0.565	-1.384	0.392	-3.557	3.8e-4	0.003
ENSMUSG00000052396.7	Mogat2	2.104	3.487	0.722	-1.382	0.334	-3.095	0.002	0.013
ENSMUSG00000039911.13	Spsb1	15.006	22.135	7.877	-1.382	0.148	-5.044	4.6e-7	6.8e-6
ENSMUSG00000026131.18	Dst	29.303	42.793	15.813	-1.381	0.079	-10.495	9.2e-26	9.0e-24
ENSMUSG00000029769.16	Ccdc136	8.529	12.77	4.287	-1.381	0.157	-4.944	7.6e-7	1.1e-5
ENSMUSG00000023067.13	Cdkn1a	284.153	411.085	157.222	-1.381	0.1	-7.344	2.1e-13	7.2e-12
ENSMUSG00000043336.14	Filip1l	36.041	52.505	19.576	-1.379	0.097	-8.01	1.1e-15	5.1e-14
ENSMUSG00000034786.17	Gpsm3	4.3	6.656	1.944	-1.379	0.267	-4.633	3.6e-6	4.7e-5
ENSMUSG00000025330.6	Padi4	4.537	6.997	2.076	-1.378	0.191	-5.57	2.6e-8	4.6e-7
ENSMUSG00000002900.16	Lamb1	81.319	117.89	44.749	-1.378	0.088	-8.38	5.3e-17	2.7e-15
ENSMUSG00000025268.15	Maged2	36.532	53.203	19.861	-1.378	0.091	-8.028	9.9e-16	4.4e-14
ENSMUSG00000045455.8	Gm9797	17.149	25.208	9.091	-1.377	0.314	-1.12	0.263	0.596
ENSMUSG00000028464.16	Tpm2	667.514	964.224	370.804	-1.376	0.101	-7.36	1.8e-13	6.5e-12
ENSMUSG00000040663.8	Clcf1	24.823	36.282	13.363	-1.376	0.111	-6.494	8.4e-11	2.1e-9
ENSMUSG00000033717.5	Adra2a	1.892	3.173	0.61	-1.374	0.262	-6.712	1.9e-11	5.3e-10
ENSMUSG00000039208.15	Metrnl	24.741	36.135	13.348	-1.372	0.161	-5.024	5.1e-7	7.5e-6
ENSMUSG00000018648.15	Dusp14	28.199	41.118	15.281	-1.371	0.13	-6.337	2.3e-10	5.6e-9
ENSMUSG00000043300.2	B3galnt1	2.8	4.481	1.12	-1.37	0.249	-5.406	6.4e-8	1.1e-6
ENSMUSG00000026797.16	Stxbp1	11.614	17.187	6.041	-1.369	0.105	-8.154	3.5e-16	1.6e-14
ENSMUSG00000056054.9	S100a8	4.186	6.476	1.896	-1.368	0.66	-1.611	0.107	0.33
ENSMUSG00000039114.16	Nrn1	2.154	3.546	0.761	-1.368	0.447	-4.032	5.5e-5	5.6e-4
ENSMUSG00000116417.1	CT025619.2	4.936	7.557	2.316	-1.368	0.152	-6.827	8.7e-12	2.5e-10
ENSMUSG00000031119.4	Gpc4	50.886	73.777	27.995	-1.367	0.14	-5.484	4.2e-8	7.4e-7
ENSMUSG00000061451.13	Tmem151a	3.516	5.508	1.524	-1.367	0.249	-3.142	0.002	0.011
ENSMUSG00000020422.13	Tns3	58.275	84.418	32.133	-1.366	0.072	-9.21	3.3e-20	2.2e-18
ENSMUSG00000049580.12	Tsku	16.676	24.472	8.881	-1.366	0.153	-4.219	2.5e-5	2.7e-4
ENSMUSG00000045566.1	Sprr4	0.789	1.577	0	-1.366	4.001	-0.512	0.609	0.888
ENSMUSG00000000730.13	Dnmt3l	1.666	2.841	0.49	-1.366	0.675	-2.082	0.037	0.151
ENSMUSG00000014444.17	Piezo1	45.595	66.138	25.052	-1.366	0.123	-6.273	3.5e-10	8.2e-9
ENSMUSG00000029093.14	Sorcs2	30.335	44.143	16.527	-1.365	0.134	-6.048	1.5e-9	3.2e-8
ENSMUSG00000110234.2	Gm45799	8.072	12.069	4.076	-1.364	0.345	-0.244	0.808	0.945
ENSMUSG00000024268.16	Celf4	3.108	4.918	1.299	-1.364	0.184	-6.466	1.0e-10	2.5e-9
ENSMUSG00000025854.15	Fam20c	7.732	11.577	3.886	-1.364	0.198	-4.5	6.8e-6	8.3e-5
ENSMUSG00000054720.12	Lrrc8c	20.958	30.628	11.289	-1.364	0.098	-7.26	3.9e-13	1.3e-11
ENSMUSG00000036192.15	Rorb	1.251	2.243	0.26	-1.364	0.211	-10.306	6.6e-25	6.1e-23
ENSMUSG00000010830.8	Kdelr3	35.869	52.097	19.641	-1.363	0.114	-6.671	2.5e-11	6.8e-10
ENSMUSG00000029781.7	Fkbp9	66.245	95.835	36.655	-1.363	0.073	-10.012	1.4e-23	1.1e-21
ENSMUSG00000020044.13	Timp3	94.341	136.257	52.426	-1.361	0.166	-3.593	3.3e-4	0.003
ENSMUSG00000041075.8	Fzd7	11.672	17.242	6.103	-1.361	0.105	-8.016	1.1e-15	4.8e-14
ENSMUSG00000002885.14	Adgre5	25.606	37.297	13.916	-1.36	0.126	-6.672	2.5e-11	6.8e-10
ENSMUSG00000026610.13	Esrrg	1.373	2.415	0.33	-1.36	0.67	-1.068	0.285	0.625
ENSMUSG00000002233.13	Rhoc	315.697	454.761	176.632	-1.359	0.095	-7.68	1.6e-14	6.3e-13
ENSMUSG00000038400.15	Pmepa1	114.088	164.614	63.562	-1.359	0.132	-5.158	2.5e-7	3.9e-6
ENSMUSG00000021280.9	Exoc3l4	4.158	6.423	1.894	-1.359	0.324	-4.591	4.4e-6	5.6e-5
ENSMUSG00000063354.7	Slc39a4	34.515	50.096	18.934	-1.358	0.104	-8.251	1.6e-16	7.5e-15
ENSMUSG00000020889.11	Nr1d1	12.266	18.084	6.448	-1.357	0.115	-7.15	8.7e-13	2.8e-11
ENSMUSG00000028541.14	B4galt2	7.214	10.813	3.615	-1.356	0.159	-5.463	4.7e-8	8.2e-7
ENSMUSG00000021469.9	Msx2	13.1	19.278	6.923	-1.356	0.116	-7.177	7.1e-13	2.3e-11
ENSMUSG00000027805.16	Pfn2	24.08	35.067	13.094	-1.356	0.108	-7.331	2.3e-13	7.9e-12
ENSMUSG00000058254.12	Tspan7	13.573	19.956	7.19	-1.355	0.128	-6.252	4.0e-10	9.3e-9
ENSMUSG00000062380.4	Tubb3	6.327	9.535	3.12	-1.355	0.618	-1.268	0.205	0.512
ENSMUSG00000031558.15	Slit2	2.1	3.455	0.745	-1.352	0.241	-8.65	5.1e-18	2.9e-16
ENSMUSG00000044550.11	Tceal3	3.562	5.554	1.57	-1.351	0.338	-3.076	0.002	0.014
ENSMUSG00000070871.10	Ccnyl1	25.836	37.556	14.116	-1.351	0.114	-5.247	1.5e-7	2.5e-6
ENSMUSG00000030498.15	Gas2	2.494	4.02	0.968	-1.351	0.315	-1.32	0.187	0.482
ENSMUSG00000061119.7	Prcp	8.104	12.078	4.129	-1.35	0.132	-7.45	9.4e-14	3.4e-12
ENSMUSG00000020986.13	Sec23a	22.118	32.209	12.028	-1.35	0.097	-8.143	3.9e-16	1.8e-14
ENSMUSG00000059775.5	Rps26-ps1	1.022	1.904	0.14	-1.35	2.188	-1.432	0.152	0.42
ENSMUSG00000015745.9	Plekho1	26.484	38.475	14.492	-1.349	0.162	-3.948	7.9e-5	7.7e-4
ENSMUSG00000042834.14	Nrep	35.514	51.438	19.59	-1.349	0.11	-6.718	1.8e-11	5.1e-10
ENSMUSG00000032802.8	Srxn1	47.574	68.749	26.398	-1.348	0.104	-6.288	3.2e-10	7.5e-9
ENSMUSG00000025289.15	Prdx4	44.158	63.84	24.476	-1.348	0.114	-6.343	2.3e-10	5.4e-9
ENSMUSG00000025969.15	Nrp2	8.273	12.305	4.24	-1.344	0.114	-7.714	1.2e-14	4.9e-13
ENSMUSG00000022094.15	Slc39a14	10.34	15.265	5.415	-1.342	0.112	-4.959	7.1e-7	1.0e-5
ENSMUSG00000037656.9	Slc20a2	17.577	25.641	9.513	-1.342	0.108	-6.223	4.9e-10	1.1e-8
ENSMUSG00000020181.16	Nav3	1.231	2.199	0.262	-1.341	0.263	-7.997	1.3e-15	5.6e-14
ENSMUSG00000027078.14	Ube2l6	9.924	14.665	5.182	-1.341	0.167	-5.117	3.1e-7	4.8e-6
ENSMUSG00000074874.10	Ctla2b	10.041	14.833	5.249	-1.341	0.242	-3.411	6.5e-4	0.005
ENSMUSG00000019577.6	Pdk4	6.661	9.983	3.339	-1.34	0.17	-5.95	2.7e-9	5.6e-8
ENSMUSG00000003573.15	Homer3	45.1	65.079	25.122	-1.339	0.11	-6.396	1.6e-10	3.9e-9
ENSMUSG00000000957.11	Mmp14	257.531	369.542	145.52	-1.339	0.12	-6.128	8.9e-10	2.0e-8
ENSMUSG00000050737.13	Ptges	35.396	51.165	19.628	-1.338	0.106	-7.262	3.8e-13	1.3e-11
ENSMUSG00000062563.15	Cys1	1.83	3.056	0.605	-1.338	0.406	-3.923	8.7e-5	8.4e-4
ENSMUSG00000082545.1	Gm12196	0.764	1.527	0	-1.338	3.388	-0.756	0.449	0.798
ENSMUSG00000021260.8	Hhipl1	1.509	2.594	0.423	-1.337	0.23	-8.519	1.6e-17	8.7e-16
ENSMUSG00000030428.16	Ttyh1	1.386	2.419	0.354	-1.336	0.365	-4.152	3.3e-5	3.5e-4
ENSMUSG00000031227.8	Magee1	3.005	4.734	1.275	-1.334	0.207	-6.077	1.2e-9	2.7e-8
ENSMUSG00000067377.12	Tspan6	12.616	18.496	6.737	-1.333	0.15	-5.578	2.4e-8	4.4e-7
ENSMUSG00000037820.15	Tgm2	188.125	269.765	106.485	-1.333	0.096	-7.189	6.5e-13	2.1e-11
ENSMUSG00000014776.7	Nol3	2.086	3.417	0.755	-1.332	0.292	-5.361	8.3e-8	1.4e-6
ENSMUSG00000060591.9	Ifitm2	140.176	201.005	79.346	-1.33	0.103	-6.792	1.1e-11	3.1e-10
ENSMUSG00000022377.16	Asap1	16.993	24.744	9.242	-1.33	0.125	-5.316	1.1e-7	1.8e-6
ENSMUSG00000075312.4	Gm13597	24.458	35.421	13.495	-1.329	0.425	-1.807	0.071	0.244
ENSMUSG00000032006.15	Pdgfd	11.629	17.065	6.193	-1.329	0.176	-4.748	2.1e-6	2.8e-5
ENSMUSG00000006589.8	Aprt	66.738	95.895	37.58	-1.329	0.117	-6.168	6.9e-10	1.5e-8
ENSMUSG00000020312.12	Shc2	4.825	7.331	2.319	-1.328	0.146	-7.38	1.6e-13	5.6e-12
ENSMUSG00000033730.4	Egr3	1.15	2.074	0.226	-1.327	0.371	-6.582	4.7e-11	1.2e-9
ENSMUSG00000032875.8	Arhgef17	21.586	31.295	11.877	-1.327	0.114	-6.533	6.5e-11	1.6e-9
ENSMUSG00000026211.17	Obsl1	12.762	18.677	6.847	-1.326	0.127	-6.279	3.4e-10	7.9e-9
ENSMUSG00000008206.16	Cers4	4.253	6.509	1.998	-1.325	0.261	-2.669	0.008	0.041
ENSMUSG00000048482.14	Bdnf	4.091	6.274	1.907	-1.323	0.196	-5.555	2.8e-8	5.0e-7
ENSMUSG00000037679.9	Inf2	30.098	43.431	16.765	-1.323	0.098	-6.766	1.3e-11	3.7e-10
ENSMUSG00000073802.4	Cdkn2b	29.562	42.661	16.463	-1.322	0.188	-4.004	6.2e-5	6.2e-4
ENSMUSG00000028967.10	Errfi1	47.888	68.832	26.945	-1.321	0.13	-5.499	3.8e-8	6.8e-7
ENSMUSG00000030905.5	Crym	1.309	2.298	0.321	-1.321	0.505	-4.215	2.5e-5	2.7e-4
ENSMUSG00000025978.14	Rftn2	1.443	2.489	0.398	-1.32	0.315	-6.557	5.5e-11	1.4e-9
ENSMUSG00000038296.14	Galnt18	22.031	31.886	12.177	-1.319	0.117	-6.306	2.9e-10	6.7e-9
ENSMUSG00000041351.16	Rap1gap	2.163	3.516	0.81	-1.319	0.258	-4.24	2.2e-5	2.5e-4
ENSMUSG00000029761.16	Cald1	690.532	986.333	394.732	-1.319	0.101	-7.039	1.9e-12	6.0e-11
ENSMUSG00000054555.11	Adam12	14.457	21.068	7.845	-1.319	0.183	-4.166	3.1e-5	3.3e-4
ENSMUSG00000031880.7	Rrad	6.085	9.115	3.055	-1.319	0.185	-5.371	7.8e-8	1.3e-6
ENSMUSG00000040265.16	Dnm3	2.98	4.682	1.279	-1.318	0.25	-2.955	0.003	0.019
ENSMUSG00000041986.16	Elmod1	3.691	5.696	1.687	-1.317	0.258	-4.345	1.4e-5	1.6e-4
ENSMUSG00000054057.2	A930004D18Rik	5.783	8.681	2.885	-1.317	0.232	-1.753	0.08	0.265
ENSMUSG00000090243.1	Gm16103	5.328	8.029	2.627	-1.316	0.238	-3.984	6.8e-5	6.7e-4
ENSMUSG00000028480.14	Glipr2	63.73	91.355	36.105	-1.316	0.097	-7.083	1.4e-12	4.5e-11
ENSMUSG00000027843.13	Ptpn22	9.693	14.255	5.13	-1.315	0.204	-3.349	8.1e-4	0.006
ENSMUSG00000075592.10	Nynrin	2.308	3.719	0.898	-1.314	0.199	-5.335	9.5e-8	1.6e-6
ENSMUSG00000020184.15	Mdm2	94.434	135.098	53.77	-1.313	0.096	-7.107	1.2e-12	3.8e-11
ENSMUSG00000024462.17	Gabbr1	17.315	25.114	9.515	-1.312	0.138	-3.736	1.9e-4	0.002
ENSMUSG00000033278.10	Ptprm	5.205	7.847	2.564	-1.312	0.231	-4.225	2.4e-5	2.6e-4
ENSMUSG00000002808.7	Epdr1	11.43	16.722	6.138	-1.312	0.133	-6.594	4.3e-11	1.1e-9
ENSMUSG00000050359.7	Sprr1a	835.451	1191.5	479.401	-1.312	0.094	-7.16	8.1e-13	2.6e-11
ENSMUSG00000060093.6	Hist1h4a	2.092	3.406	0.777	-1.31	0.793	-1.813	0.07	0.241
ENSMUSG00000034981.9	Parm1	10.875	15.922	5.829	-1.309	0.16	-5.158	2.5e-7	3.9e-6
ENSMUSG00000061306.15	Slc38a10	39.55	56.774	22.325	-1.309	0.14	-5.667	1.5e-8	2.8e-7
ENSMUSG00000021996.16	Esd	675.421	962.694	388.148	-1.308	0.108	-5.551	2.8e-8	5.1e-7
ENSMUSG00000091405.2	Hist2h4	9.789	14.371	5.208	-1.308	0.275	-2.711	0.007	0.037
ENSMUSG00000042812.5	Foxf1	2.37	3.801	0.939	-1.308	0.258	-5.339	9.3e-8	1.6e-6
ENSMUSG00000022474.15	Pmm1	35.209	50.574	19.844	-1.307	0.126	-5.57	2.5e-8	4.6e-7
ENSMUSG00000082016.3	Pgam1-ps2	65.508	93.702	37.314	-1.306	0.219	-3.308	9.4e-4	0.007
ENSMUSG00000029913.14	Prdm5	2.849	4.479	1.218	-1.305	0.251	-4.95	7.4e-7	1.1e-5
ENSMUSG00000057596.13	Trim30d	3.164	4.928	1.401	-1.304	0.275	-4.345	1.4e-5	1.6e-4
ENSMUSG00000072812.4	Ahnak2	14.466	21.015	7.918	-1.304	0.154	-5.15	2.6e-7	4.1e-6
ENSMUSG00000063873.10	Slc24a3	3.418	5.289	1.548	-1.304	0.221	-5.24	1.6e-7	2.6e-6
ENSMUSG00000026657.16	Frmd4a	10.419	15.253	5.586	-1.303	0.109	-7.128	1.0e-12	3.3e-11
ENSMUSG00000028995.14	Fam126a	6.613	9.834	3.392	-1.302	0.146	-5.993	2.1e-9	4.4e-8
ENSMUSG00000042106.5	Fam212a	3.206	4.985	1.428	-1.302	0.34	-3.306	9.5e-4	0.007
ENSMUSG00000024187.14	Fam234a	30.616	43.981	17.252	-1.301	0.096	-6.819	9.2e-12	2.6e-10
ENSMUSG00000025068.7	Gsto1	213.955	304.8	123.109	-1.301	0.099	-6.732	1.7e-11	4.7e-10
ENSMUSG00000024270.11	Slc39a6	30.963	44.469	17.458	-1.301	0.093	-7.427	1.1e-13	4.0e-12
ENSMUSG00000066113.16	Adamtsl1	1.611	2.714	0.508	-1.3	0.236	-9.909	3.8e-23	3.1e-21
ENSMUSG00000034595.17	Ppp1r18	58.403	83.482	33.325	-1.299	0.112	-5.419	6.0e-8	1.0e-6
ENSMUSG00000004846.10	Plod3	52.686	75.308	30.064	-1.297	0.113	-6.335	2.4e-10	5.6e-9
ENSMUSG00000037463.14	Fbxo27	1.586	2.676	0.497	-1.296	0.442	-3.145	0.002	0.011
ENSMUSG00000029156.11	Sgcb	3.262	5.058	1.467	-1.296	0.184	-6.188	6.1e-10	1.4e-8
ENSMUSG00000075254.11	Heg1	15.698	22.727	8.669	-1.295	0.118	-5.882	4.1e-9	8.3e-8
ENSMUSG00000032515.8	Csrnp1	35.53	50.893	20.167	-1.294	0.106	-6.952	3.6e-12	1.1e-10
ENSMUSG00000038463.8	Olfml2b	2.13	3.446	0.815	-1.293	0.254	-5.655	1.6e-8	2.9e-7
ENSMUSG00000031749.12	St3gal2	23.411	33.668	13.155	-1.292	0.139	-5.201	2.0e-7	3.2e-6
ENSMUSG00000028980.14	H6pd	39.254	56.166	22.342	-1.292	0.116	-5.036	4.8e-7	7.1e-6
ENSMUSG00000036067.12	Slc2a6	1.797	2.972	0.622	-1.292	0.297	-5.377	7.6e-8	1.3e-6
ENSMUSG00000030921.17	Trim30a	5.189	7.787	2.59	-1.291	0.209	-4.945	7.6e-7	1.1e-5
ENSMUSG00000090362.1	Vmn2r79	1.239	2.178	0.3	-1.29	0.38	-5.736	9.7e-9	1.9e-7
ENSMUSG00000067629.12	Syngap1	5.171	7.758	2.584	-1.289	0.153	-5.204	1.9e-7	3.1e-6
ENSMUSG00000025538.15	Sumf2	13.841	20.061	7.621	-1.289	0.142	-3.582	3.4e-4	0.003
ENSMUSG00000113946.1	Gm47250	1.524	2.581	0.467	-1.287	3.264	-0.414	0.679	0.925
ENSMUSG00000037148.8	Arhgap10	17.68	25.495	9.865	-1.286	0.101	-7.223	5.1e-13	1.7e-11
ENSMUSG00000060519.11	Tor3a	16.833	24.292	9.373	-1.286	0.122	-5.217	1.8e-7	2.9e-6
ENSMUSG00000013089.15	Etv5	5.112	7.668	2.557	-1.285	0.149	-5.93	3.0e-9	6.3e-8
ENSMUSG00000035678.7	Tnfsf9	3.196	4.946	1.445	-1.282	0.309	-3.718	2.0e-4	0.002
ENSMUSG00000028599.10	Tnfrsf1b	8.564	12.553	4.575	-1.282	0.115	-6.817	9.3e-12	2.6e-10
ENSMUSG00000031274.16	Col4a5	29.18	41.76	16.6	-1.281	0.114	-6.245	4.2e-10	9.7e-9
ENSMUSG00000082116.1	Gm12188	1.312	2.275	0.348	-1.28	1.913	-1.011	0.312	0.657
ENSMUSG00000028989.3	Angptl7	3.464	5.323	1.604	-1.28	0.284	-3.581	3.4e-4	0.003
ENSMUSG00000027858.13	Tspan2	4.174	6.329	2.019	-1.279	0.151	-6.697	2.1e-11	5.8e-10
ENSMUSG00000047090.13	Tmem198b	6.007	8.925	3.089	-1.279	0.154	-6.203	5.6e-10	1.3e-8
ENSMUSG00000049881.13	2810025M15Rik	8.815	12.901	4.729	-1.279	0.232	-3.312	9.3e-4	0.007
ENSMUSG00000020654.15	Adcy3	4.583	6.905	2.26	-1.278	0.149	-7.219	5.3e-13	1.7e-11
ENSMUSG00000024691.13	Fam111a	4.508	6.798	2.217	-1.277	0.166	-7.416	1.2e-13	4.4e-12
ENSMUSG00000004562.16	Arhgef40	31.737	45.345	18.129	-1.277	0.094	-7.95	1.9e-15	8.1e-14
ENSMUSG00000027276.7	Jag1	39.001	55.622	22.379	-1.276	0.138	-5.029	4.9e-7	7.3e-6
ENSMUSG00000062488.9	Ifit3b	3.963	6.024	1.902	-1.275	0.256	-3.962	7.4e-5	7.2e-4
ENSMUSG00000055866.9	Per2	1.279	2.225	0.333	-1.275	0.279	-4.724	2.3e-6	3.1e-5
ENSMUSG00000026596.13	Abl2	12.81	18.544	7.076	-1.275	0.091	-5.525	3.3e-8	5.9e-7
ENSMUSG00000063531.7	Sema3e	1.494	2.528	0.46	-1.273	0.246	-7.335	2.2e-13	7.7e-12
ENSMUSG00000028370.7	Pappa	1.219	2.139	0.299	-1.273	0.203	-10.89	1.3e-27	1.4e-25
ENSMUSG00000071180.5	Smim15	62.867	89.348	36.386	-1.273	0.12	-4.935	8.0e-7	1.1e-5
ENSMUSG00000029860.16	Zyx	311.773	441.435	182.111	-1.273	0.126	-4.558	5.2e-6	6.5e-5
ENSMUSG00000038151.13	Prdm1	1.295	2.246	0.344	-1.272	0.253	-7.38	1.6e-13	5.6e-12
ENSMUSG00000004768.14	Rab23	13.256	19.16	7.353	-1.271	0.13	-3.455	5.5e-4	0.004
ENSMUSG00000057469.8	E2f6	14.334	20.682	7.986	-1.271	0.118	-6.065	1.3e-9	2.9e-8
ENSMUSG00000067547.6	Gm7666	0.706	1.413	0	-1.271	3.912	-1.612	0.107	0.329
ENSMUSG00000038227.15	Hoxa9	1.117	1.993	0.241	-1.27	0.529	-3.535	4.1e-4	0.003
ENSMUSG00000028214.13	Gem	2.362	3.753	0.972	-1.269	0.299	-4.249	2.1e-5	2.4e-4
ENSMUSG00000029201.14	Ugdh	31.093	44.367	17.819	-1.269	0.106	-6.902	5.1e-12	1.5e-10
ENSMUSG00000060477.14	Irak2	34.665	49.414	19.915	-1.269	0.111	-3.686	2.3e-4	0.002
ENSMUSG00000033436.13	Armcx2	13.014	18.808	7.219	-1.269	0.127	-5.992	2.1e-9	4.4e-8
ENSMUSG00000063160.12	Numbl	22.418	32.1	12.736	-1.269	0.15	-4.628	3.7e-6	4.8e-5
ENSMUSG00000010067.13	Rassf1	55.694	79.121	32.266	-1.268	0.086	-7.342	2.1e-13	7.3e-12
ENSMUSG00000029759.9	Pon3	10.142	14.743	5.54	-1.267	0.149	-5.089	3.6e-7	5.5e-6
ENSMUSG00000028613.14	Lrp8	6.661	9.824	3.497	-1.267	0.146	-2.933	0.003	0.021
ENSMUSG00000024766.14	Lipo3	4.737	7.105	2.368	-1.267	0.175	-5.626	1.8e-8	3.4e-7
ENSMUSG00000035852.11	Misp	3.057	4.732	1.383	-1.266	0.254	-3.425	6.1e-4	0.005
ENSMUSG00000026482.13	Rgl1	2.413	3.821	1.004	-1.266	0.205	-9.339	9.7e-21	6.7e-19
ENSMUSG00000086316.8	Nbdy	28.28	40.362	16.198	-1.266	0.171	-3.753	1.8e-4	0.002
ENSMUSG00000045932.12	Ifit2	5.432	8.085	2.778	-1.266	0.182	-4.843	1.3e-6	1.8e-5
ENSMUSG00000037003.16	Tns2	7.398	10.862	3.934	-1.266	0.165	-4.75	2.0e-6	2.7e-5
ENSMUSG00000029581.14	Fscn1	220.266	311.423	129.108	-1.264	0.147	-4.024	5.7e-5	5.7e-4
ENSMUSG00000027712.13	Anxa5	288.818	408.175	169.461	-1.263	0.097	-5.761	8.4e-9	1.6e-7
ENSMUSG00000028270.12	Gbp2	7.881	11.537	4.224	-1.263	0.162	-4.943	7.7e-7	1.1e-5
ENSMUSG00000020439.17	Smtn	61.032	86.565	35.499	-1.262	0.126	-5.147	2.7e-7	4.1e-6
ENSMUSG00000053615.1	Gm9913	0.888	1.664	0.112	-1.261	0.482	-6.908	4.9e-12	1.4e-10
ENSMUSG00000022091.6	Sorbs3	7.609	11.148	4.069	-1.261	0.128	-6.182	6.3e-10	1.4e-8
ENSMUSG00000010663.4	Fads1	25.45	36.324	14.575	-1.261	0.084	-7.891	3.0e-15	1.3e-13
ENSMUSG00000052776.10	Oas1a	14.876	21.394	8.358	-1.259	0.155	-4.568	4.9e-6	6.2e-5
ENSMUSG00000046491.10	C1qtnf2	0.914	1.699	0.128	-1.259	0.764	-4.271	1.9e-5	2.2e-4
ENSMUSG00000043822.18	Adamtsl5	12.522	18.072	6.972	-1.258	0.163	-5.272	1.3e-7	2.2e-6
ENSMUSG00000042367.12	Gjb3	41.734	59.269	24.198	-1.258	0.11	-6.093	1.1e-9	2.4e-8
ENSMUSG00000029171.12	Pgm1	13.07	18.843	7.297	-1.258	0.126	-5.512	3.6e-8	6.4e-7
ENSMUSG00000051615.14	Rap2a	10.865	15.733	5.998	-1.258	0.103	-7.196	6.2e-13	2.0e-11
ENSMUSG00000035095.11	Fam167a	4.266	6.426	2.106	-1.257	0.173	-5.453	5.0e-8	8.7e-7
ENSMUSG00000060727.4	Gm12571	0.695	1.39	0	-1.257	3.746	-0.579	0.563	0.877
ENSMUSG00000037613.16	Tnfrsf23	26.964	38.423	15.504	-1.256	0.136	-4.503	6.7e-6	8.2e-5
ENSMUSG00000024538.7	Ppic	115.895	163.793	67.997	-1.256	0.128	-4.943	7.7e-7	1.1e-5
ENSMUSG00000024423.5	Impact	13.26	19.1	7.42	-1.255	0.128	-5.634	1.8e-8	3.3e-7
ENSMUSG00000028385.14	Snx30	12.457	17.964	6.95	-1.254	0.107	-6.164	7.1e-10	1.6e-8
ENSMUSG00000073489.6	Ifi204	1.878	3.054	0.701	-1.253	0.313	-4.695	2.7e-6	3.5e-5
ENSMUSG00000113294.1	AC154636.1	1.261	2.185	0.337	-1.252	3.19	-0.471	0.638	0.905
ENSMUSG00000056917.12	Sipa1	5.561	8.239	2.882	-1.251	0.138	-6.3	3.0e-10	7.0e-9
ENSMUSG00000033355.6	Rtp4	23.199	33.074	13.325	-1.25	0.178	-3.537	4.1e-4	0.003
ENSMUSG00000033960.5	Jcad	11.12	16.065	6.175	-1.25	0.135	-5.559	2.7e-8	4.9e-7
ENSMUSG00000043067.15	Dpy19l1	5.668	8.388	2.948	-1.25	0.126	-6.699	2.1e-11	5.8e-10
ENSMUSG00000046567.10	4930430F08Rik	6.675	9.804	3.546	-1.249	0.205	-2.217	0.027	0.115
ENSMUSG00000052459.13	Atp6v1a	42.193	59.79	24.595	-1.248	0.09	-5.37	7.9e-8	1.3e-6
ENSMUSG00000095545.7	Zfp969	5.517	8.171	2.864	-1.247	1.099	-0.574	0.566	0.877
ENSMUSG00000028789.16	Azin2	19.935	28.457	11.413	-1.247	0.131	-4.89	1.0e-6	1.4e-5
ENSMUSG00000026509.15	Capn2	151.868	214.084	89.652	-1.246	0.107	-5.849	5.0e-9	1.0e-7
ENSMUSG00000031451.6	Gas6	45.813	64.865	26.761	-1.246	0.119	-5.172	2.3e-7	3.6e-6
ENSMUSG00000027472.14	Pdrg1	65.594	92.691	38.497	-1.246	0.094	-7.116	1.1e-12	3.6e-11
ENSMUSG00000019055.15	Plod1	26.945	38.305	15.585	-1.245	0.087	-7.972	1.6e-15	6.8e-14
ENSMUSG00000052698.15	Tln2	5.219	7.747	2.691	-1.245	0.142	-6.226	4.8e-10	1.1e-8
ENSMUSG00000024127.14	Prepl	15.931	22.812	9.05	-1.244	0.094	-7.091	1.3e-12	4.2e-11
ENSMUSG00000040118.15	Cacna2d1	3.995	6.025	1.965	-1.244	0.156	-5.122	3.0e-7	4.7e-6
ENSMUSG00000026620.11	Mark1	6.563	9.634	3.491	-1.244	0.125	-6.513	7.4e-11	1.9e-9
ENSMUSG00000058799.15	Nap1l1	224.604	316.232	132.975	-1.244	0.092	-6.102	1.0e-9	2.3e-8
ENSMUSG00000065954.11	Tacc1	9.238	13.39	5.085	-1.242	0.102	-9.234	2.6e-20	1.7e-18
ENSMUSG00000025352.6	Gdf11	2.057	3.296	0.818	-1.241	0.206	-6.627	3.4e-11	9.0e-10
ENSMUSG00000054469.13	Lclat1	14.833	21.251	8.415	-1.241	0.098	-2.86	0.004	0.025
ENSMUSG00000019467.15	Arhgef25	15.527	22.224	8.829	-1.241	0.113	-5.468	4.5e-8	8.0e-7
ENSMUSG00000090485.1	Gm17416	2.404	3.782	1.025	-1.239	2.14	-0.596	0.551	0.872
ENSMUSG00000114257.1	Gm47654	1.641	2.71	0.572	-1.239	0.504	-3.094	0.002	0.013
ENSMUSG00000064317.5	Gm10146	29.925	42.441	17.41	-1.239	0.435	-1.629	0.103	0.321
ENSMUSG00000069008.3	Gm5537	25.539	36.266	14.811	-1.237	2.074	-0.331	0.741	0.925
ENSMUSG00000022996.15	Wnt10b	2.303	3.637	0.968	-1.237	0.242	-5.417	6.1e-8	1.1e-6
ENSMUSG00000032717.14	Mdfi	9.313	13.479	5.148	-1.236	0.179	-3.51	4.5e-4	0.004
ENSMUSG00000009772.15	Nuak2	17.692	25.239	10.144	-1.235	0.154	-4.536	5.7e-6	7.1e-5
ENSMUSG00000044216.7	Kcnj4	1.634	2.697	0.57	-1.235	0.317	-5.067	4.0e-7	6.1e-6
ENSMUSG00000027499.12	Pkia	4.703	7.005	2.401	-1.235	0.203	-1.121	0.262	0.595
ENSMUSG00000031273.16	Col4a6	3.768	5.692	1.844	-1.234	0.133	-7.322	2.4e-13	8.4e-12
ENSMUSG00000028059.15	Arhgef2	36.851	52.114	21.588	-1.234	0.117	-5.169	2.4e-7	3.7e-6
ENSMUSG00000097854.1	Gm26602	1.449	2.436	0.461	-1.233	2.226	-0.684	0.494	0.83
ENSMUSG00000040339.10	Fam102b	11.384	16.376	6.392	-1.233	0.11	-6.629	3.4e-11	8.9e-10
ENSMUSG00000090639.1	Gm20425	0.769	1.481	0.056	-1.232	3.548	-1.168	0.243	0.569
ENSMUSG00000113480.1	Gm47413	0.674	1.348	0	-1.231	4.001	-0.512	0.609	0.888
ENSMUSG00000020325.10	Fstl3	54.888	77.388	32.387	-1.231	0.14	-4.503	6.7e-6	8.2e-5
ENSMUSG00000008384.8	Sertad1	27.569	39.068	16.069	-1.231	0.135	-4.238	2.3e-5	2.5e-4
ENSMUSG00000019796.12	Lrp11	6.027	8.855	3.198	-1.231	0.222	-3.659	2.5e-4	0.002
ENSMUSG00000034807.9	Colgalt1	87.513	123.114	51.912	-1.23	0.112	-5.489	4.0e-8	7.2e-7
ENSMUSG00000022330.5	Osr2	2.715	4.209	1.221	-1.23	0.289	-4.459	8.2e-6	9.8e-5
ENSMUSG00000033788.15	Dysf	5.224	7.726	2.721	-1.23	0.163	-6.234	4.6e-10	1.0e-8
ENSMUSG00000025887.10	Casp12	1.351	2.295	0.407	-1.228	0.382	-4.949	7.5e-7	1.1e-5
ENSMUSG00000021838.17	Samd4	24.663	34.961	14.365	-1.227	0.118	-4.911	9.0e-7	1.3e-5
ENSMUSG00000057230.13	Aak1	16.154	23.038	9.271	-1.227	0.082	-3.583	3.4e-4	0.003
ENSMUSG00000034040.16	Galnt17	1.072	1.904	0.241	-1.227	0.293	-7.067	1.6e-12	5.0e-11
ENSMUSG00000039747.11	Orai2	11.417	16.399	6.435	-1.227	0.11	-5.701	1.2e-8	2.3e-7
ENSMUSG00000028476.13	Reck	1.718	2.808	0.628	-1.226	0.204	-6.611	3.8e-11	1.0e-9
ENSMUSG00000017400.10	Stac2	2.022	3.234	0.811	-1.226	0.256	-4.972	6.6e-7	9.6e-6
ENSMUSG00000024371.14	C2	7.293	10.615	3.97	-1.225	0.176	-11.909	1.1e-32	1.5e-30
ENSMUSG00000083715.1	Gm14202	0.667	1.334	0	-1.223	2.894	-1.094	0.274	0.611
ENSMUSG00000030560.17	Ctsc	7.836	11.372	4.3	-1.223	0.154	-5.231	1.7e-7	2.7e-6
ENSMUSG00000051022.7	Hs3st1	3.815	5.741	1.889	-1.223	0.221	-4.367	1.3e-5	1.5e-4
ENSMUSG00000020580.10	Rock2	51.636	72.685	30.587	-1.222	0.09	-5.763	8.3e-9	1.6e-7
ENSMUSG00000026490.18	Cdc42bpa	28.89	40.836	16.944	-1.221	0.084	-7.12	1.1e-12	3.5e-11
ENSMUSG00000029622.16	Arpc1b	245.892	344.553	147.231	-1.221	0.098	-5.838	5.3e-9	1.1e-7
ENSMUSG00000026814.16	Eng	17.066	24.285	9.847	-1.221	0.507	-1.272	0.203	0.51
ENSMUSG00000039153.16	Runx2	3.175	4.842	1.508	-1.22	0.179	-4.209	2.6e-5	2.8e-4
ENSMUSG00000023972.9	Ptk7	40.954	57.705	24.203	-1.22	0.118	-5.227	1.7e-7	2.8e-6
ENSMUSG00000031574.8	Star	2.324	3.651	0.997	-1.22	0.233	-2.647	0.008	0.044
ENSMUSG00000078776.9	9530053A07Rik	2.869	4.413	1.325	-1.219	0.203	-5.395	6.9e-8	1.2e-6
ENSMUSG00000069972.6	Rps13-ps2	132.02	185.102	78.937	-1.219	0.156	-3.833	1.3e-4	0.001
ENSMUSG00000029648.13	Flt1	6.711	9.788	3.634	-1.219	0.138	-5.27	1.4e-7	2.2e-6
ENSMUSG00000032056.10	Btg4	0.884	1.635	0.132	-1.219	1.544	-1.821	0.069	0.238
ENSMUSG00000017817.11	Jph2	5.289	7.797	2.781	-1.218	0.179	-4.6	4.2e-6	5.4e-5
ENSMUSG00000027412.12	Lpin3	24.253	34.321	14.185	-1.218	0.087	-7.369	1.7e-13	6.1e-12
ENSMUSG00000026247.13	Ecel1	0.704	1.383	0.025	-1.217	1.218	-1.551	0.121	0.359
ENSMUSG00000032366.15	Tpm1	2012.84	2814.75	1210.93	-1.216	0.109	-5.419	6.0e-8	1.0e-6
ENSMUSG00000000531.5	Grasp	3.232	4.916	1.547	-1.216	0.302	-3.464	5.3e-4	0.004
ENSMUSG00000019975.12	Ikbip	22.416	31.734	13.098	-1.215	0.108	-7.429	1.1e-13	4.0e-12
ENSMUSG00000111228.1	Gm48789	0.66	1.321	0	-1.215	4.033	-0.401	0.688	0.925
ENSMUSG00000019832.5	Rab32	12.274	17.552	6.996	-1.214	0.157	-4.312	1.6e-5	1.8e-4
ENSMUSG00000030401.16	Rtn2	2.15	3.402	0.897	-1.214	0.282	-2.912	0.004	0.022
ENSMUSG00000023088.17	Abcc1	26.71	37.726	15.694	-1.214	0.087	-6.901	5.2e-12	1.5e-10
ENSMUSG00000103723.1	Gm37095	1.492	2.482	0.501	-1.214	2.749	-0.602	0.547	0.869
ENSMUSG00000022664.11	Slc35a5	8.843	12.75	4.936	-1.212	0.124	-0.628	0.53	0.859
ENSMUSG00000029802.13	Abcg2	31.651	44.598	18.704	-1.21	0.158	-4.75	2.0e-6	2.7e-5
ENSMUSG00000030630.16	Fah	11.061	15.843	6.279	-1.21	0.158	-4.017	5.9e-5	5.9e-4
ENSMUSG00000053746.8	Ptrh1	34.449	48.495	20.403	-1.209	0.158	-3.167	0.002	0.011
ENSMUSG00000025867.8	Cplx2	3.148	4.79	1.505	-1.209	0.188	-5.388	7.1e-8	1.2e-6
ENSMUSG00000019850.11	Tnfaip3	27.115	38.243	15.987	-1.208	0.122	-4.025	5.7e-5	5.7e-4
ENSMUSG00000034947.13	Tmem106a	6.814	9.907	3.721	-1.208	0.162	-3.608	3.1e-4	0.003
ENSMUSG00000096035.2	Odaph	3.118	4.748	1.488	-1.208	0.485	-2.227	0.026	0.113
ENSMUSG00000030729.17	Pgm2l1	1.758	2.849	0.667	-1.207	0.195	-6.356	2.1e-10	5.0e-9
ENSMUSG00000025855.13	Prkar1b	8.358	12.06	4.657	-1.207	0.172	-6.815	9.4e-12	2.7e-10
ENSMUSG00000069305.3	Hist1h4n	15.968	22.677	9.259	-1.207	0.307	-2.024	0.043	0.168
ENSMUSG00000102914.1	Gm35106	0.653	1.306	0	-1.206	3.985	-0.582	0.56	0.876
ENSMUSG00000085998.8	AW822252	3.832	5.74	1.923	-1.205	0.619	-1.294	0.196	0.498
ENSMUSG00000012519.14	Mlkl	16.72	23.719	9.721	-1.205	0.123	-5.339	9.4e-8	1.6e-6
ENSMUSG00000058013.11	Sept11	51.506	72.237	30.776	-1.205	0.104	-5.417	6.0e-8	1.1e-6
ENSMUSG00000040907.15	Atp1a3	1.152	2.002	0.303	-1.204	0.39	-4.853	1.2e-6	1.7e-5
ENSMUSG00000031342.17	Gpm6b	3.566	5.367	1.764	-1.204	0.165	-6.14	8.3e-10	1.8e-8
ENSMUSG00000029380.11	Cxcl1	49.802	69.85	29.755	-1.204	0.165	-3.45	5.6e-4	0.004
ENSMUSG00000039831.16	Arhgap29	21.05	29.747	12.354	-1.203	0.102	-5.68	1.3e-8	2.6e-7
ENSMUSG00000026825.17	Dnm1	2.215	3.482	0.947	-1.203	0.233	-6.28	3.4e-10	7.9e-9
ENSMUSG00000062929.8	Cfl2	99.134	138.596	59.671	-1.202	0.103	-6.388	1.7e-10	4.1e-9
ENSMUSG00000026941.16	Mamdc4	1.282	2.181	0.382	-1.202	0.438	-1.689	0.091	0.293
ENSMUSG00000000628.10	Hk2	20.76	29.329	12.19	-1.201	0.09	-6.505	7.7e-11	2.0e-9
ENSMUSG00000046667.14	Rbm12b1	3.2	4.854	1.547	-1.201	0.23	-1.252	0.211	0.52
ENSMUSG00000071547.4	Nt5dc2	5.076	7.468	2.684	-1.201	0.242	-3.842	1.2e-4	0.001
ENSMUSG00000024074.7	Crim1	55.736	78.065	33.407	-1.2	0.09	-6.442	1.2e-10	2.9e-9
ENSMUSG00000048988.8	Elfn1	1.322	2.235	0.408	-1.2	0.319	-6.86	6.9e-12	2.0e-10
ENSMUSG00000056501.3	Cebpb	24.352	34.325	14.38	-1.2	0.82	-0.811	0.417	0.77
ENSMUSG00000023827.8	Agpat4	9.367	13.443	5.292	-1.199	0.177	-4.426	9.6e-6	1.1e-4
ENSMUSG00000056515.8	Rab31	19.758	27.918	11.598	-1.199	0.127	-4.975	6.5e-7	9.5e-6
ENSMUSG00000024349.9	Tmem173	14.779	20.979	8.578	-1.198	0.114	-5.648	1.6e-8	3.0e-7
ENSMUSG00000050558.13	Prokr2	1.624	2.655	0.593	-1.198	0.258	-5.182	2.2e-7	3.5e-6
ENSMUSG00000020057.2	Dram1	4.65	6.87	2.43	-1.198	0.158	-5.38	7.5e-8	1.3e-6
ENSMUSG00000040711.7	Sh3pxd2b	16.311	23.113	9.51	-1.198	0.1	-6.312	2.8e-10	6.5e-9
ENSMUSG00000027624.19	Epb41l1	32.864	46.164	19.564	-1.198	0.088	-6.447	1.1e-10	2.8e-9
ENSMUSG00000041801.5	Phlda3	151.922	211.96	91.884	-1.197	0.142	-4.047	5.2e-5	5.3e-4
ENSMUSG00000025809.15	Itgb1	563.848	785.483	342.213	-1.196	0.107	-5.26	1.4e-7	2.3e-6
ENSMUSG00000032601.13	Prkar2a	20.382	28.759	12.005	-1.194	0.092	-4.697	2.6e-6	3.5e-5
ENSMUSG00000006519.11	Cyba	156.722	218.515	94.929	-1.194	0.119	-4.799	1.6e-6	2.2e-5
ENSMUSG00000030410.16	Dmwd	18.674	26.378	10.97	-1.194	0.119	-5.251	1.5e-7	2.5e-6
ENSMUSG00000003549.9	Ercc1	47.568	66.581	28.556	-1.193	0.097	-6.73	1.7e-11	4.7e-10
ENSMUSG00000027488.12	Snta1	3.982	5.929	2.034	-1.191	0.276	-3.251	0.001	0.008
ENSMUSG00000035964.8	Tmem59l	2.02	3.2	0.84	-1.191	0.329	-3.887	1.0e-4	9.6e-4
ENSMUSG00000027966.20	Col11a1	2.566	3.959	1.173	-1.191	0.259	-5.742	9.4e-9	1.8e-7
ENSMUSG00000024725.12	Ostf1	25.779	36.232	15.327	-1.189	0.11	-5.329	9.9e-8	1.6e-6
ENSMUSG00000021978.9	Extl3	22.727	31.989	13.466	-1.189	0.085	-6.016	1.8e-9	3.8e-8
ENSMUSG00000033735.9	Spr	34.161	47.884	20.439	-1.189	0.116	-5.208	1.9e-7	3.0e-6
ENSMUSG00000044042.18	Fmn1	6.4	9.288	3.512	-1.189	0.109	-6.577	4.8e-11	1.2e-9
ENSMUSG00000102543.5	Pcdhgc5	0.799	1.5	0.097	-1.189	0.442	-4.8	1.6e-6	2.2e-5
ENSMUSG00000029174.18	Tbc1d1	29.059	40.783	17.334	-1.188	0.118	-5.309	1.1e-7	1.8e-6
ENSMUSG00000043421.8	Hilpda	15.293	21.645	8.942	-1.188	0.2	-2.978	0.003	0.018
ENSMUSG00000045679.14	Pqlc3	10.87	15.497	6.243	-1.187	0.141	-5.66	1.5e-8	2.9e-7
ENSMUSG00000023452.18	Pisd	27.381	38.435	16.327	-1.186	0.093	-4.814	1.5e-6	2.0e-5
ENSMUSG00000082870.1	Gm12165	1.256	2.135	0.378	-1.186	1.648	-1.086	0.278	0.616
ENSMUSG00000042156.16	Dzip1	4.474	6.605	2.342	-1.186	0.236	-3.778	1.6e-4	0.001
ENSMUSG00000022620.14	Arsa	7.07	10.212	3.928	-1.186	0.14	-5.093	3.5e-7	5.4e-6
ENSMUSG00000035775.2	Krt20	12.236	17.389	7.083	-1.186	0.141	-4.632	3.6e-6	4.7e-5
ENSMUSG00000061731.9	Ext1	43.394	60.677	26.112	-1.186	0.13	-4.956	7.2e-7	1.0e-5
ENSMUSG00000019986.17	Ahi1	1.948	3.095	0.801	-1.185	0.222	-5.823	5.8e-9	1.2e-7
ENSMUSG00000073002.9	Vamp5	21.793	30.657	12.93	-1.184	0.207	-3.205	0.001	0.009
ENSMUSG00000028538.12	St3gal3	9.023	12.92	5.126	-1.184	0.176	-3.803	1.4e-4	0.001
ENSMUSG00000055030.1	Sprr2e	1.63	2.652	0.607	-1.184	0.678	-2.085	0.037	0.15
ENSMUSG00000022261.6	Sdc2	20.144	28.362	11.927	-1.184	0.115	-5.303	1.1e-7	1.9e-6
ENSMUSG00000028287.4	1700009N14Rik	1.668	2.704	0.631	-1.183	0.442	-3.341	8.4e-4	0.006
ENSMUSG00000004044.9	Cavin1	84.619	117.846	51.392	-1.182	0.107	-5.592	2.2e-8	4.1e-7
ENSMUSG00000034462.9	Pkd2	17.556	24.753	10.359	-1.181	0.127	-4.673	3.0e-6	3.9e-5
ENSMUSG00000072115.11	Ang	5.143	7.525	2.761	-1.181	0.306	-2.564	0.01	0.054
ENSMUSG00000023169.15	Slc38a1	19.714	27.744	11.684	-1.18	0.118	-4.73	2.2e-6	3.0e-5
ENSMUSG00000031149.7	Praf2	28.449	39.864	17.033	-1.18	0.107	-5.345	9.0e-8	1.5e-6
ENSMUSG00000067924.4	Rtl8b	21.693	30.481	12.905	-1.179	0.127	-4.69	2.7e-6	3.6e-5
ENSMUSG00000029608.10	Rph3a	0.886	1.616	0.156	-1.179	0.338	-8.117	4.8e-16	2.2e-14
ENSMUSG00000037426.17	Depdc5	9.475	13.527	5.423	-1.177	0.109	-7.304	2.8e-13	9.5e-12
ENSMUSG00000019978.16	Epb41l2	63.74	88.776	38.703	-1.177	0.105	-5.857	4.7e-9	9.6e-8
ENSMUSG00000030638.13	Sh3gl3	1.79	2.869	0.712	-1.176	0.385	-5.371	7.8e-8	1.3e-6
ENSMUSG00000078597.2	Cyp4a12b	2.461	3.799	1.124	-1.176	0.241	-4.665	3.1e-6	4.0e-5
ENSMUSG00000024743.15	Syt7	1.546	2.529	0.562	-1.176	0.257	-4.538	5.7e-6	7.0e-5
ENSMUSG00000061115.4	Gm17113	0.629	1.259	0	-1.176	4.047	-0.362	0.717	0.925
ENSMUSG00000026166.14	Ccl20	8.26	11.831	4.69	-1.173	0.249	-2.486	0.013	0.064
ENSMUSG00000021760.4	Gpx8	87.669	121.858	53.48	-1.173	0.1	-5.408	6.4e-8	1.1e-6
ENSMUSG00000022244.7	Amacr	4.774	7	2.548	-1.173	0.215	-3.03	0.002	0.016
ENSMUSG00000015653.13	Steap2	12.552	17.777	7.328	-1.173	0.149	-3.294	9.9e-4	0.007
ENSMUSG00000015027.11	Galns	4.957	7.254	2.661	-1.173	0.172	-4.312	1.6e-5	1.8e-4
ENSMUSG00000084842.3	Pabpc1l2b-ps	2.747	4.191	1.303	-1.172	0.523	-1.995	0.046	0.177
ENSMUSG00000078920.3	Ifi47	14.126	19.951	8.301	-1.172	0.142	-4.108	4.0e-5	4.2e-4
ENSMUSG00000027962.14	Vcam1	5.564	8.092	3.037	-1.171	0.186	-5.759	8.4e-9	1.7e-7
ENSMUSG00000029771.12	Irf5	5.412	7.878	2.946	-1.17	0.176	-5.177	2.3e-7	3.6e-6
ENSMUSG00000026278.14	Bok	33.583	46.882	20.283	-1.17	0.151	-3.532	4.1e-4	0.003
ENSMUSG00000026222.16	Sp100	6.328	9.145	3.51	-1.17	0.189	-3.732	1.9e-4	0.002
ENSMUSG00000046318.15	Ccbe1	28.632	40.024	17.24	-1.169	0.127	-4.041	5.3e-5	5.4e-4
ENSMUSG00000041117.8	Ccdc8	1.257	2.124	0.389	-1.169	0.262	-6.963	3.3e-12	1.0e-10
ENSMUSG00000018363.16	Smurf2	35.315	49.268	21.362	-1.169	0.091	-5.882	4.0e-9	8.3e-8
ENSMUSG00000021253.7	Tgfb3	32.712	45.66	19.764	-1.168	0.113	-4.992	6.0e-7	8.7e-6
ENSMUSG00000028849.17	Map7d1	145.244	201.401	89.086	-1.168	0.138	-4.017	5.9e-5	5.9e-4
ENSMUSG00000074925.3	Ptar1	4.542	6.669	2.415	-1.167	0.204	-3.978	7.0e-5	6.8e-4
ENSMUSG00000083233.1	Gm13406	0.623	1.245	0	-1.167	3.77	-0.568	0.57	0.877
ENSMUSG00000020773.11	Trim47	22.658	31.728	13.587	-1.166	0.141	-3.611	3.0e-4	0.003
ENSMUSG00000029767.16	Calu	264.974	366.897	163.052	-1.165	0.081	-6.508	7.6e-11	1.9e-9
ENSMUSG00000050908.12	Tvp23a	1.324	2.214	0.434	-1.165	0.352	-4.413	1.0e-5	1.2e-4
ENSMUSG00000038172.14	Ttc39b	8.408	12.01	4.806	-1.164	0.133	-3.563	3.7e-4	0.003
ENSMUSG00000024781.15	Lipa	10.515	14.924	6.107	-1.164	0.167	-3.977	7.0e-5	6.8e-4
ENSMUSG00000019194.15	Scn1b	14.815	20.868	8.761	-1.164	0.186	-3.281	0.001	0.007
ENSMUSG00000041773.8	Enc1	21.517	30.134	12.9	-1.163	0.102	-5.67	1.4e-8	2.7e-7
ENSMUSG00000087651.3	1500009L16Rik	6.864	9.873	3.855	-1.163	0.244	-2.314	0.021	0.094
ENSMUSG00000052485.7	Tmem171	49.216	68.415	30.017	-1.162	0.119	-4.256	2.1e-5	2.3e-4
ENSMUSG00000032826.17	Ank2	2.976	4.496	1.456	-1.162	0.169	-10.994	4.1e-28	4.6e-26
ENSMUSG00000020333.17	Acsl6	1.023	1.797	0.25	-1.162	0.45	-6.228	4.7e-10	1.1e-8
ENSMUSG00000025006.16	Sorbs1	45.116	62.716	27.516	-1.16	0.097	-4.873	1.1e-6	1.5e-5
ENSMUSG00000034424.5	Gcsh	27.149	37.89	16.408	-1.16	0.115	-4.137	3.5e-5	3.7e-4
ENSMUSG00000022750.17	Klhl22	30.857	43.009	18.704	-1.159	0.099	-7.207	5.7e-13	1.9e-11
ENSMUSG00000035186.6	Ubd	3.563	5.304	1.823	-1.159	0.362	-2.432	0.015	0.072
ENSMUSG00000042759.12	Apobr	3.463	5.166	1.761	-1.159	0.158	-5.627	1.8e-8	3.4e-7
ENSMUSG00000081161.1	Gm12783	0.747	1.413	0.08	-1.159	2.067	-1.622	0.105	0.325
ENSMUSG00000027919.5	Lce1g	22.354	31.256	13.453	-1.158	0.138	-4.052	5.1e-5	5.2e-4
ENSMUSG00000038418.7	Egr1	27.692	38.624	16.76	-1.158	0.127	-4.6	4.2e-6	5.4e-5
ENSMUSG00000078532.9	Nkain1	24.83	34.668	14.993	-1.157	0.196	-3.004	0.003	0.017
ENSMUSG00000028776.14	Tinagl1	187.745	259.605	115.885	-1.157	0.078	-6.833	8.3e-12	2.4e-10
ENSMUSG00000037217.15	Syn1	1.385	2.293	0.477	-1.157	0.296	-5.4	6.7e-8	1.2e-6
ENSMUSG00000096096.3	Trav4-4-dv10	0.789	1.469	0.108	-1.156	1.967	-1.509	0.131	0.381
ENSMUSG00000038729.23	Akap2	67.778	93.946	41.61	-1.156	0.103	-5.82	5.9e-9	1.2e-7
ENSMUSG00000013698.12	Pea15a	103.908	143.819	63.997	-1.156	0.081	-6.66	2.7e-11	7.4e-10
ENSMUSG00000042244.4	Pglyrp3	6.678	9.598	3.757	-1.156	0.296	-2.425	0.015	0.073
ENSMUSG00000032198.9	Dock6	5.496	7.966	3.027	-1.155	0.137	-5.79	7.0e-9	1.4e-7
ENSMUSG00000032251.12	Irak1bp1	3.881	5.736	2.026	-1.154	0.235	-2.835	0.005	0.027
ENSMUSG00000032491.14	Nradd	49.432	68.592	30.272	-1.154	0.124	-4.589	4.5e-6	5.6e-5
ENSMUSG00000024079.4	Eif2ak2	17.422	24.417	10.426	-1.153	0.131	-3.873	1.1e-4	0.001
ENSMUSG00000069893.10	9930111J21Rik1	10.303	14.595	6.011	-1.153	0.173	-3.258	0.001	0.008
ENSMUSG00000028381.8	Ugcg	24.005	33.496	14.514	-1.153	0.086	-7.084	1.4e-12	4.4e-11
ENSMUSG00000032763.11	Ilvbl	19.36	27.087	11.632	-1.153	0.105	-2.571	0.01	0.053
ENSMUSG00000033149.16	Phldb2	90.545	125.284	55.805	-1.153	0.109	-4.416	1.0e-5	1.2e-4
ENSMUSG00000049807.16	Arhgap23	12.59	17.745	7.436	-1.152	0.145	-4.529	5.9e-6	7.3e-5
ENSMUSG00000021373.16	Cap2	1.979	3.109	0.849	-1.152	0.247	-5.424	5.8e-8	1.0e-6
ENSMUSG00000014301.13	Pam16	39.514	54.87	24.159	-1.151	0.157	-3.124	0.002	0.012
ENSMUSG00000021950.15	Anxa8	5.45	7.895	3.005	-1.151	0.18	-4.129	3.6e-5	3.8e-4
ENSMUSG00000045658.16	Pid1	3.163	4.741	1.586	-1.151	0.226	-3.428	6.1e-4	0.005
ENSMUSG00000022947.7	Cbr3	11.058	15.627	6.49	-1.15	0.184	-3.393	6.9e-4	0.005
ENSMUSG00000096949.1	Gm26897	1.231	2.076	0.386	-1.15	2.68	-0.702	0.483	0.821
ENSMUSG00000024395.8	Lims2	17.58	24.613	10.548	-1.149	0.128	-5.218	1.8e-7	2.9e-6
ENSMUSG00000078915.2	Hsp25-ps1	1.447	2.373	0.521	-1.149	2.25	-0.749	0.454	0.8
ENSMUSG00000112069.1	Gm9476	0.922	1.649	0.195	-1.149	0.928	-2.658	0.008	0.043
ENSMUSG00000009418.15	Nav1	11.283	15.928	6.638	-1.148	0.11	-6.008	1.9e-9	4.0e-8
ENSMUSG00000035372.1	1810055G02Rik	27.879	38.799	16.959	-1.148	0.097	-5.505	3.7e-8	6.6e-7
ENSMUSG00000026014.15	Raph1	17.355	24.288	10.423	-1.147	0.099	-2.177	0.029	0.125
ENSMUSG00000031791.8	Tmem38a	9.003	12.78	5.227	-1.146	0.144	-3.42	6.3e-4	0.005
ENSMUSG00000023906.2	Cldn6	5.104	7.409	2.8	-1.146	0.28	-2.797	0.005	0.03
ENSMUSG00000098181.1	Rps12-ps24	0.606	1.213	0	-1.146	2.149	-1.842	0.066	0.231
ENSMUSG00000035901.14	Dennd5a	26.394	36.734	16.055	-1.146	0.097	-5.753	8.8e-9	1.7e-7
ENSMUSG00000023008.18	Fmnl3	3.901	5.751	2.051	-1.146	0.163	-5.292	1.2e-7	2.0e-6
ENSMUSG00000023947.7	Nfkbie	7.423	10.602	4.245	-1.145	0.15	-4.446	8.7e-6	1.0e-4
ENSMUSG00000027408.7	Cpxm1	1.161	1.977	0.346	-1.145	0.395	-4.5	6.8e-6	8.3e-5
ENSMUSG00000055320.17	Tead1	42.841	59.384	26.298	-1.145	0.095	-5.02	5.2e-7	7.6e-6
ENSMUSG00000026999.14	Nup35	12.892	18.134	7.651	-1.145	0.144	-3.521	4.3e-4	0.003
ENSMUSG00000089739.2	Gm20431	3.884	5.727	2.042	-1.145	0.276	-2.961	0.003	0.019
ENSMUSG00000036968.15	Cnpy4	13.066	18.373	7.76	-1.145	0.132	-4.832	1.4e-6	1.9e-5
ENSMUSG00000022892.11	App	408.03	562.288	253.773	-1.145	0.099	-5.082	3.7e-7	5.7e-6
ENSMUSG00000052688.12	Rab7b	6.415	9.209	3.62	-1.144	0.165	-3.836	1.2e-4	0.001
ENSMUSG00000026181.12	Ppm1f	6.919	9.902	3.935	-1.144	0.105	-6.427	1.3e-10	3.2e-9
ENSMUSG00000076534.6	Igkv12-89	0.604	1.209	0	-1.143	2.819	-1.163	0.245	0.571
ENSMUSG00000020205.8	Phlda1	160.547	221.398	99.696	-1.143	0.089	-5.766	8.1e-9	1.6e-7
ENSMUSG00000031875.7	Cmtm3	51.315	71.013	31.616	-1.143	0.12	-3.352	8.0e-4	0.006
ENSMUSG00000027695.16	Pld1	3.015	4.527	1.504	-1.142	0.166	-5.606	2.1e-8	3.8e-7
ENSMUSG00000098132.1	Rassf10	3.097	4.64	1.555	-1.142	0.197	-4.699	2.6e-6	3.5e-5
ENSMUSG00000022836.10	Mylk	12.374	17.407	7.34	-1.142	0.151	-3.725	2.0e-4	0.002
ENSMUSG00000041845.10	Rhod	22.699	31.618	13.779	-1.142	0.129	-4.27	2.0e-5	2.2e-4
ENSMUSG00000087006.3	Gm13889	1.745	2.778	0.712	-1.142	0.564	-2.132	0.033	0.137
ENSMUSG00000062478.16	Ctrc	5.092	7.384	2.8	-1.142	0.859	-0.866	0.387	0.74
ENSMUSG00000050248.11	Evc2	7.385	10.538	4.232	-1.141	0.137	-4.523	6.1e-6	7.5e-5
ENSMUSG00000027935.14	Rab13	11.237	15.838	6.636	-1.141	0.165	-3.695	2.2e-4	0.002
ENSMUSG00000022043.19	Trim35	38.592	53.478	23.707	-1.141	0.087	-6.021	1.7e-9	3.7e-8
ENSMUSG00000028195.4	Cyr61	533.775	734.827	332.722	-1.141	0.087	-5.777	7.6e-9	1.5e-7
ENSMUSG00000035199.6	Arl6ip5	76.679	105.881	47.477	-1.141	0.086	-5.843	5.1e-9	1.0e-7
ENSMUSG00000042436.12	Mfap4	2.855	4.304	1.406	-1.141	0.337	-1.856	0.063	0.225
ENSMUSG00000020272.8	Stk10	3.588	5.312	1.863	-1.14	0.164	-5.315	1.1e-7	1.8e-6
ENSMUSG00000020646.17	Mboat2	4.208	6.165	2.25	-1.14	0.215	-3.003	0.003	0.017
ENSMUSG00000020160.18	Meis1	2.285	3.52	1.05	-1.14	0.29	-3.692	2.2e-4	0.002
ENSMUSG00000025351.14	Cd63	382.725	526.934	238.517	-1.14	0.098	-5.111	3.2e-7	4.9e-6
ENSMUSG00000042215.8	Bag2	34.481	47.813	21.149	-1.14	0.133	-3.587	3.3e-4	0.003
ENSMUSG00000091228.1	Gm20390	51.126	70.711	31.54	-1.14	0.116	-4.484	7.3e-6	8.9e-5
ENSMUSG00000068748.7	Ptprz1	10.82	15.259	6.382	-1.139	0.121	-4.807	1.5e-6	2.1e-5
ENSMUSG00000042622.14	Maff	66.934	92.441	41.427	-1.139	0.129	-4.005	6.2e-5	6.2e-4
ENSMUSG00000029580.14	Actb	3546.31	4878.14	2214.48	-1.139	0.093	-3.216	0.001	0.009
ENSMUSG00000037239.8	Spred3	6.019	8.655	3.384	-1.139	0.137	-5.708	1.1e-8	2.2e-7
ENSMUSG00000001750.15	Tcirg1	38.549	53.391	23.708	-1.138	0.097	-4.157	3.2e-5	3.4e-4
ENSMUSG00000032294.17	Pkm	545.085	749.977	340.193	-1.138	0.091	-5.198	2.0e-7	3.2e-6
ENSMUSG00000115797.1	AC122320.1	0.6	1.201	0	-1.138	3.77	-0.568	0.57	0.877
ENSMUSG00000022957.19	Itsn1	21.519	29.967	13.07	-1.138	0.115	-2.786	0.005	0.031
ENSMUSG00000030074.9	Gxylt2	1.495	2.431	0.559	-1.138	0.242	-5.668	1.4e-8	2.7e-7
ENSMUSG00000030067.17	Foxp1	15.953	22.312	9.595	-1.138	0.122	-3.39	7.0e-4	0.005
ENSMUSG00000053219.15	Raet1e	12.105	17.018	7.192	-1.137	0.151	-4.072	4.7e-5	4.8e-4
ENSMUSG00000031595.9	Pdgfrl	1.247	2.089	0.406	-1.136	0.421	-3.606	3.1e-4	0.003
ENSMUSG00000004631.15	Sgce	11.681	16.43	6.932	-1.136	0.139	-3.987	6.7e-5	6.6e-4
ENSMUSG00000003545.3	Fosb	4.372	6.382	2.362	-1.135	0.166	-3.79	1.5e-4	0.001
ENSMUSG00000083913.1	Gm14219	2.586	3.927	1.244	-1.135	1.624	-0.644	0.519	0.852
ENSMUSG00000003518.13	Dusp3	27.404	38.03	16.777	-1.135	0.102	-4.415	1.0e-5	1.2e-4
ENSMUSG00000074916.5	Chst14	11.624	16.345	6.902	-1.134	0.145	-4.183	2.9e-5	3.1e-4
ENSMUSG00000025402.12	Nab2	13.007	18.245	7.768	-1.134	0.124	-4.595	4.3e-6	5.5e-5
ENSMUSG00000030850.17	Ate1	11.682	16.424	6.939	-1.134	0.116	-2.757	0.006	0.033
ENSMUSG00000054793.8	Cadm4	24.301	33.757	14.845	-1.133	0.16	-3.349	8.1e-4	0.006
ENSMUSG00000023249.15	Parp3	18.553	25.86	11.246	-1.133	0.139	-3.303	9.6e-4	0.007
ENSMUSG00000020810.5	Cygb	1.684	2.687	0.681	-1.133	0.301	-4.34	1.4e-5	1.6e-4
ENSMUSG00000038987.8	Cfap157	8.903	12.602	5.203	-1.133	0.269	-1.713	0.087	0.282
ENSMUSG00000030123.15	Plxnd1	6.045	8.676	3.414	-1.132	0.156	-8.021	1.0e-15	4.6e-14
ENSMUSG00000057751.14	Megf6	7.899	11.221	4.576	-1.132	0.188	-3.483	5.0e-4	0.004
ENSMUSG00000006445.3	Epha2	66.51	91.701	41.32	-1.131	0.091	-5.258	1.5e-7	2.4e-6
ENSMUSG00000004885.5	Crabp2	2.653	4.016	1.291	-1.13	0.375	-2.692	0.007	0.039
ENSMUSG00000050022.16	Amz1	1.888	2.965	0.812	-1.13	0.285	-2.378	0.017	0.082
ENSMUSG00000028028.11	Alpk1	1.599	2.568	0.631	-1.13	0.228	-2.158	0.031	0.13
ENSMUSG00000034361.10	Cpne2	10.3	14.51	6.09	-1.129	0.149	-4.902	9.5e-7	1.3e-5
ENSMUSG00000020424.3	Gatsl3	9.55	13.478	5.621	-1.129	0.16	-3.791	1.5e-4	0.001
ENSMUSG00000103318.1	Gm38356	2.997	4.485	1.508	-1.129	0.967	-0.863	0.388	0.741
ENSMUSG00000044345.9	Marveld1	15.447	21.567	9.327	-1.128	0.107	-5.053	4.3e-7	6.5e-6
ENSMUSG00000029364.15	Wsb2	77.04	106.071	48.01	-1.127	0.094	-5.002	5.7e-7	8.3e-6
ENSMUSG00000057098.14	Ebf1	1.198	2.016	0.381	-1.127	0.25	-6.811	9.7e-12	2.7e-10
ENSMUSG00000022389.15	Tef	17.415	24.263	10.566	-1.127	0.107	-0.43	0.668	0.92
ENSMUSG00000030824.17	Nucb1	189.196	259.903	118.49	-1.127	0.105	-4.51	6.5e-6	7.9e-5
ENSMUSG00000026456.18	Cyb5r1	41.47	57.245	25.694	-1.126	0.091	-5.123	3.0e-7	4.7e-6
ENSMUSG00000040274.11	Cdk6	21.27	29.541	12.998	-1.126	0.096	-2.17	0.03	0.127
ENSMUSG00000035104.14	Eva1a	7.806	11.077	4.535	-1.126	0.155	-4.397	1.1e-5	1.3e-4
ENSMUSG00000030770.15	Parva	87.022	119.715	54.33	-1.125	0.087	-5.043	4.6e-7	6.8e-6
ENSMUSG00000027540.13	Ptpn1	27.171	37.633	16.709	-1.125	0.098	-0.34	0.734	0.925
ENSMUSG00000083405.1	Gm15725	0.591	1.181	0	-1.125	1.469	-4.453	8.5e-6	1.0e-4
ENSMUSG00000047554.14	Tmem41b	34.593	47.81	21.376	-1.125	0.106	-1.891	0.059	0.212
ENSMUSG00000015354.8	Pcolce2	2.238	3.44	1.035	-1.125	0.267	-5.758	8.5e-9	1.7e-7
ENSMUSG00000020844.6	Nxn	37.113	51.263	22.962	-1.125	0.13	-3.734	1.9e-4	0.002
ENSMUSG00000064023.4	Klk8	7.426	10.553	4.299	-1.125	0.212	-2.836	0.005	0.027
ENSMUSG00000032336.17	Nptn	182.285	250.272	114.298	-1.124	0.092	-3.948	7.9e-5	7.6e-4
ENSMUSG00000079600.2	Gm17604	1.821	2.868	0.775	-1.124	2.093	-0.575	0.565	0.877
ENSMUSG00000023009.14	Nckap5l	3.526	5.204	1.848	-1.123	0.191	-4.979	6.4e-7	9.3e-6
ENSMUSG00000074305.9	Peak1	15.565	21.701	9.43	-1.122	0.108	-5.162	2.4e-7	3.8e-6
ENSMUSG00000024953.16	Prdx5	123.306	169.344	77.269	-1.122	0.096	-5.227	1.7e-7	2.8e-6
ENSMUSG00000018042.18	Cyb5r3	97.778	134.344	61.212	-1.121	0.102	-5.027	5.0e-7	7.4e-6
ENSMUSG00000032279.11	Idh3a	36.973	51.024	22.921	-1.121	0.105	-5.378	7.5e-8	1.3e-6
ENSMUSG00000001768.15	Rin2	24.847	34.408	15.287	-1.12	0.123	-2.903	0.004	0.022
ENSMUSG00000020649.11	Rrm2	23.341	32.342	14.34	-1.12	0.103	-5.094	3.5e-7	5.3e-6
ENSMUSG00000114123.1	Gm48416	3.436	5.075	1.796	-1.12	0.239	-3.426	6.1e-4	0.005
ENSMUSG00000022150.16	Dab2	3.107	4.625	1.589	-1.119	0.302	-2.412	0.016	0.076
ENSMUSG00000026836.15	Acvr1	29.173	40.324	18.023	-1.119	0.103	-5.271	1.4e-7	2.2e-6
ENSMUSG00000034275.18	Igsf9b	3.643	5.359	1.927	-1.119	0.107	-5.615	2.0e-8	3.6e-7
ENSMUSG00000067931.5	Zfp948	4.935	7.127	2.743	-1.119	0.162	-4.455	8.4e-6	1.0e-4
ENSMUSG00000022602.14	Arc	4.787	6.923	2.652	-1.117	0.162	-4.586	4.5e-6	5.7e-5
ENSMUSG00000082687.1	Gm11474	1.429	2.325	0.533	-1.117	2.403	-0.64	0.522	0.853
ENSMUSG00000020123.6	Avpr1a	0.885	1.581	0.19	-1.117	0.426	-5.725	1.0e-8	2.0e-7
ENSMUSG00000092035.8	Peg10	1.104	1.881	0.328	-1.117	0.252	-7.485	7.1e-14	2.7e-12
ENSMUSG00000027199.14	Gatm	1.861	2.916	0.806	-1.117	0.302	-4.002	6.3e-5	6.2e-4
ENSMUSG00000030029.14	Lrig1	7.995	11.312	4.679	-1.116	0.108	-6.724	1.8e-11	4.9e-10
ENSMUSG00000057554.13	Lgals8	25.858	35.749	15.967	-1.115	0.112	-3.879	1.0e-4	9.9e-4
ENSMUSG00000095115.2	Itpripl2	52.108	71.666	32.55	-1.115	0.092	-5.392	7.0e-8	1.2e-6
ENSMUSG00000045934.15	Mtmr11	12.555	17.544	7.565	-1.114	0.129	-3.821	1.3e-4	0.001
ENSMUSG00000037161.14	Mgarp	1.255	2.085	0.425	-1.114	0.513	-3.206	0.001	0.009
ENSMUSG00000057143.15	Trim12c	9.374	13.191	5.557	-1.114	0.115	-5.213	1.9e-7	3.0e-6
ENSMUSG00000018405.7	Mrm1	8.884	12.52	5.248	-1.114	0.158	-0.839	0.402	0.755
ENSMUSG00000074269.10	Rec114	13.192	18.407	7.977	-1.112	0.287	-1.53	0.126	0.37
ENSMUSG00000017723.11	Wfdc2	169.388	231.994	106.781	-1.112	0.13	-3.511	4.5e-4	0.004
ENSMUSG00000043895.6	S1pr2	6.566	9.346	3.786	-1.112	0.117	-5.965	2.5e-9	5.1e-8
ENSMUSG00000069920.10	B3gnt9	1.273	2.107	0.438	-1.112	0.36	-4.39	1.1e-5	1.3e-4
ENSMUSG00000114367.1	Gm48216	3.418	5.04	1.796	-1.111	0.354	-2.289	0.022	0.099
ENSMUSG00000028497.12	Hacd4	6.301	8.982	3.621	-1.111	0.153	-3.388	7.0e-4	0.005
ENSMUSG00000020826.8	Nos2	7.462	10.569	4.355	-1.111	0.146	-4.694	2.7e-6	3.5e-5
ENSMUSG00000030170.14	Wnt5b	4.57	6.615	2.525	-1.111	0.199	-3.794	1.5e-4	0.001
ENSMUSG00000030530.15	Furin	69.746	95.703	43.789	-1.11	0.133	-2.901	0.004	0.023
ENSMUSG00000031521.5	Aga	50.351	69.185	31.516	-1.11	0.117	-4.272	1.9e-5	2.2e-4
ENSMUSG00000074445.4	Sprr2a3	15.059	20.948	9.17	-1.11	0.244	-1.577	0.115	0.346
ENSMUSG00000026065.8	Slc9a4	2.783	4.17	1.396	-1.11	0.21	-3.411	6.5e-4	0.005
ENSMUSG00000025185.14	Loxl4	14.469	20.141	8.798	-1.109	0.12	-4.584	4.6e-6	5.8e-5
ENSMUSG00000049482.16	Ctu2	18.45	25.578	11.322	-1.109	0.134	-0.113	0.91	0.963
ENSMUSG00000006412.10	Pfdn2	73.299	100.521	46.076	-1.109	0.115	-3.108	0.002	0.013
ENSMUSG00000029674.13	Limk1	6.866	9.748	3.984	-1.109	0.169	-3.358	7.9e-4	0.006
ENSMUSG00000020238.14	Ncln	59.44	81.58	37.299	-1.108	0.104	-4.3	1.7e-5	1.9e-4
ENSMUSG00000041180.13	Hectd2	2.208	3.383	1.034	-1.108	0.204	-4.568	4.9e-6	6.2e-5
ENSMUSG00000026413.12	Pkp1	15.091	20.981	9.2	-1.108	0.116	-4.758	2.0e-6	2.6e-5
ENSMUSG00000037104.8	Socs5	8.164	11.518	4.81	-1.107	0.111	-5.479	4.3e-8	7.6e-7
ENSMUSG00000062515.3	Fabp4	2.137	3.285	0.989	-1.107	0.441	-2.493	0.013	0.063
ENSMUSG00000025610.7	Map3k7cl	1.453	2.351	0.556	-1.107	0.391	-3.714	2.0e-4	0.002
ENSMUSG00000053522.11	Lgals7	1.596	2.545	0.647	-1.106	0.679	-1.654	0.098	0.309
ENSMUSG00000053783.5	1700016K19Rik	1.996	3.092	0.901	-1.106	0.461	-2.452	0.014	0.069
ENSMUSG00000024772.9	Ehd1	130	177.876	82.125	-1.106	0.088	-4.605	4.1e-6	5.3e-5
ENSMUSG00000026727.10	Rsu1	81.803	112.043	51.562	-1.105	0.097	-4.084	4.4e-5	4.6e-4
ENSMUSG00000037253.8	Mex3c	25.687	35.431	15.944	-1.104	0.097	-5.216	1.8e-7	2.9e-6
ENSMUSG00000008398.15	Elk3	23.362	32.256	14.469	-1.104	0.114	-3.939	8.2e-5	7.9e-4
ENSMUSG00000024659.14	Anxa1	532.541	727.249	337.833	-1.104	0.113	-4.112	3.9e-5	4.1e-4
ENSMUSG00000037601.11	Nme1	73.418	100.574	46.262	-1.104	0.118	-2.69	0.007	0.039
ENSMUSG00000016382.15	Pls3	159.566	218.143	100.99	-1.103	0.103	-4.455	8.4e-6	1.0e-4
ENSMUSG00000034006.16	Pqlc1	28.106	38.724	17.488	-1.103	0.098	-5.001	5.7e-7	8.3e-6
ENSMUSG00000027800.14	Tm4sf1	221.085	302.097	140.074	-1.103	0.133	-3.438	5.9e-4	0.005
ENSMUSG00000078984.1	Gm11027	182.142	248.946	115.338	-1.103	0.258	-1.832	0.067	0.234
ENSMUSG00000037060.3	Cavin3	141.394	193.334	89.454	-1.103	0.121	-3.93	8.5e-5	8.2e-4
ENSMUSG00000027832.5	Ptx3	1.184	1.98	0.388	-1.103	0.407	-4.262	2.0e-5	2.2e-4
ENSMUSG00000070047.14	Fat1	34.909	48	21.817	-1.103	0.088	-5.309	1.1e-7	1.8e-6
ENSMUSG00000084817.3	Gm5526	1.696	2.679	0.714	-1.102	1.119	-1.067	0.286	0.625
ENSMUSG00000032128.15	Robo3	1.466	2.364	0.567	-1.102	0.443	-1.867	0.062	0.221
ENSMUSG00000030536.10	Iqgap1	89.025	121.809	56.241	-1.101	0.087	-5.255	1.5e-7	2.4e-6
ENSMUSG00000043441.5	Gpr149	0.903	1.597	0.21	-1.101	0.427	-7.648	2.0e-14	8.0e-13
ENSMUSG00000030109.15	Slc6a12	2.737	4.096	1.377	-1.1	0.327	-3.33	8.7e-4	0.006
ENSMUSG00000033066.15	Gas7	2.599	3.908	1.289	-1.1	0.247	-5.132	2.9e-7	4.4e-6
ENSMUSG00000000544.14	Gpa33	5.085	7.299	2.872	-1.1	0.167	-3.98	6.9e-5	6.8e-4
ENSMUSG00000001021.12	S100a3	5.716	8.159	3.273	-1.1	0.364	-1.701	0.089	0.287
ENSMUSG00000020521.7	Rnft1	17.251	23.89	10.613	-1.1	0.123	-3.336	8.5e-4	0.006
ENSMUSG00000052920.14	Prkg1	1.142	1.922	0.363	-1.1	0.296	-5.627	1.8e-8	3.4e-7
ENSMUSG00000015749.12	Anp32e	27.045	37.241	16.848	-1.099	0.103	-3.056	0.002	0.015
ENSMUSG00000038604.9	Ripor1	16.84	23.325	10.354	-1.099	0.126	-4.274	1.9e-5	2.1e-4
ENSMUSG00000020251.13	Glt8d2	1.217	2.023	0.412	-1.099	0.427	-4.219	2.5e-5	2.7e-4
ENSMUSG00000020346.16	Mgat1	32.456	44.611	20.301	-1.098	0.104	-4.217	2.5e-5	2.7e-4
ENSMUSG00000091512.5	Lamtor3	34.716	47.692	21.74	-1.098	0.118	-2.859	0.004	0.025
ENSMUSG00000033400.14	Agl	8.197	11.539	4.856	-1.098	0.097	-5.871	4.3e-9	8.9e-8
ENSMUSG00000027074.14	Slc43a3	4.108	5.963	2.253	-1.098	0.206	-4.51	6.5e-6	8.0e-5
ENSMUSG00000024084.7	Qpct	1.86	2.899	0.822	-1.098	0.318	-3.547	3.9e-4	0.003
ENSMUSG00000044162.12	Tnip3	5.763	8.218	3.308	-1.097	0.257	-2.837	0.005	0.027
ENSMUSG00000108566.1	Gm45031	0.57	1.14	0	-1.097	3.291	-0.814	0.416	0.768
ENSMUSG00000031778.13	Cx3cl1	12.726	17.708	7.744	-1.097	0.105	-5.031	4.9e-7	7.2e-6
ENSMUSG00000024854.3	Pold4	34.901	47.93	21.873	-1.097	0.122	-3.976	7.0e-5	6.9e-4
ENSMUSG00000046169.10	Adamts6	3.048	4.517	1.58	-1.097	0.208	-4.724	2.3e-6	3.1e-5
ENSMUSG00000039130.18	Zc3hc1	9.809	13.728	5.89	-1.096	0.151	-2.981	0.003	0.018
ENSMUSG00000027460.7	Angpt4	4.181	6.059	2.303	-1.096	0.173	-4.28	1.9e-5	2.1e-4
ENSMUSG00000055485.6	Soga1	6.731	9.534	3.929	-1.096	0.113	-6.459	1.1e-10	2.6e-9
ENSMUSG00000035818.14	Plekhs1	92.114	125.863	58.364	-1.096	0.115	-4.073	4.6e-5	4.8e-4
ENSMUSG00000038127.14	Ccdc50	35.845	49.198	22.493	-1.095	0.1	-1.914	0.056	0.204
ENSMUSG00000023004.8	Tuba1b	288.415	393.269	183.562	-1.095	0.081	-5.515	3.5e-8	6.3e-7
ENSMUSG00000015533.9	Itga2	31.617	43.431	19.803	-1.095	0.129	-2.668	0.008	0.042
ENSMUSG00000000794.9	Kcnn3	5.991	8.522	3.459	-1.095	0.129	-4.708	2.5e-6	3.3e-5
ENSMUSG00000076919.1	Traj9	0.568	1.135	0	-1.094	4.044	-0.372	0.71	0.925
ENSMUSG00000039191.12	Rbpj	16.035	22.201	9.868	-1.094	0.085	-4.94	7.8e-7	1.1e-5
ENSMUSG00000048126.16	Col6a3	3.614	5.285	1.944	-1.094	0.211	-5.567	2.6e-8	4.7e-7
ENSMUSG00000025383.2	Il23a	16.209	22.436	9.982	-1.094	0.156	-3.141	0.002	0.011
ENSMUSG00000111890.1	Gm48836	3.836	5.585	2.086	-1.093	1.194	-0.708	0.479	0.818
ENSMUSG00000063253.11	Scoc	45.549	62.386	28.711	-1.093	0.108	-3.675	2.4e-4	0.002
ENSMUSG00000024008.15	Cpne5	1.032	1.767	0.297	-1.093	0.438	-3.647	2.7e-4	0.002
ENSMUSG00000000126.11	Wnt9a	50.344	68.907	31.78	-1.093	0.127	-3.801	1.4e-4	0.001
ENSMUSG00000025743.14	Sdc3	68.338	93.399	43.277	-1.092	0.142	-3.729	1.9e-4	0.002
ENSMUSG00000031750.15	Il34	4.331	6.258	2.404	-1.092	0.253	-0.579	0.563	0.877
ENSMUSG00000038607.12	Gng10	26.01	35.772	16.249	-1.092	0.136	-3.654	2.6e-4	0.002
ENSMUSG00000039391.11	Ccdc81	0.763	1.399	0.126	-1.091	0.487	-5.683	1.3e-8	2.5e-7
ENSMUSG00000044674.6	Fzd1	22.123	30.474	13.772	-1.091	0.091	-5.457	4.8e-8	8.5e-7
ENSMUSG00000022514.14	Il1rap	8.6	12.067	5.133	-1.091	0.134	-4.362	1.3e-5	1.5e-4
ENSMUSG00000041571.9	Selenow	138.396	188.733	88.058	-1.091	0.102	-4.483	7.4e-6	8.9e-5
ENSMUSG00000095098.1	Ccdc85b	76.891	105.012	48.77	-1.091	0.174	-2.704	0.007	0.038
ENSMUSG00000024338.14	Psmb8	23.27	32.028	14.511	-1.09	0.143	-3.258	0.001	0.008
ENSMUSG00000030669.13	Calca	0.971	1.683	0.26	-1.09	0.979	-1.852	0.064	0.227
ENSMUSG00000027852.14	Nras	46.254	63.301	29.207	-1.09	0.1	-1.464	0.143	0.403
ENSMUSG00000063275.15	Hacd1	39.148	53.626	24.669	-1.09	0.13	-3.638	2.7e-4	0.002
ENSMUSG00000075334.2	Rprm	7.202	10.159	4.244	-1.09	0.21	-2.999	0.003	0.017
ENSMUSG00000044447.5	Dock5	14.262	19.764	8.76	-1.089	0.087	-6.144	8.0e-10	1.8e-8
ENSMUSG00000021559.14	Dapk1	7.664	10.786	4.541	-1.089	0.126	-3.266	0.001	0.008
ENSMUSG00000074457.10	S100a16	103.42	141.046	65.794	-1.089	0.088	-4.672	3.0e-6	3.9e-5
ENSMUSG00000063524.13	Eno1	647.671	881.381	413.96	-1.088	0.11	-4.119	3.8e-5	4.0e-4
ENSMUSG00000002059.18	Rab34	35.096	48.095	22.096	-1.088	0.109	-4.735	2.2e-6	2.9e-5
ENSMUSG00000095648.7	Gm2004	1.678	2.642	0.714	-1.088	0.475	-0.095	0.924	0.97
ENSMUSG00000003721.14	Insig2	33.551	45.987	21.114	-1.087	0.1	-1.401	0.161	0.436
ENSMUSG00000029478.16	Ncor2	73.62	100.462	46.778	-1.087	0.148	-2.361	0.018	0.085
ENSMUSG00000036368.8	Rmdn2	7.705	10.836	4.574	-1.086	0.209	-2.1	0.036	0.146
ENSMUSG00000074766.10	Ism1	1.302	2.129	0.474	-1.086	0.285	-5.307	1.1e-7	1.8e-6
ENSMUSG00000110777.2	Ifi30	167.932	228.633	107.23	-1.085	0.089	-4.886	1.0e-6	1.4e-5
ENSMUSG00000028439.14	Fam219a	10.797	15.035	6.559	-1.085	0.13	-5.418	6.0e-8	1.1e-6
ENSMUSG00000070056.6	Mfhas1	12.942	17.951	7.934	-1.085	0.11	-4.532	5.8e-6	7.2e-5
ENSMUSG00000044864.16	Ankrd50	31.863	43.669	20.057	-1.085	0.118	-3.644	2.7e-4	0.002
ENSMUSG00000025470.11	Zfp511	17.458	24.088	10.827	-1.085	0.153	-2.508	0.012	0.061
ENSMUSG00000079330.8	Lemd1	2.734	4.076	1.393	-1.085	0.255	-0.31	0.757	0.925
ENSMUSG00000026796.16	Fam129b	139.97	190.603	89.338	-1.085	0.096	-4.449	8.6e-6	1.0e-4
ENSMUSG00000027208.14	Fgf7	1.799	2.804	0.794	-1.084	0.35	-3.672	2.4e-4	0.002
ENSMUSG00000023845.6	Lnpep	13.675	18.943	8.406	-1.084	0.12	-4.338	1.4e-5	1.6e-4
ENSMUSG00000066571.13	4931406P16Rik	15.822	21.861	9.784	-1.084	0.102	-4.345	1.4e-5	1.6e-4
ENSMUSG00000035621.13	Midn	47.924	65.486	30.362	-1.084	0.132	-2.944	0.003	0.02
ENSMUSG00000041438.8	Utp4	22.314	30.681	13.946	-1.084	0.113	-4.11	4.0e-5	4.1e-4
ENSMUSG00000026389.16	Steap3	1.921	2.969	0.872	-1.084	0.265	-4.171	3.0e-5	3.2e-4
ENSMUSG00000032661.9	Oas3	2.028	3.115	0.941	-1.084	0.22	-4.816	1.5e-6	2.0e-5
ENSMUSG00000007207.10	Stx1a	14.42	19.954	8.886	-1.084	0.154	-3.557	3.7e-4	0.003
ENSMUSG00000032285.15	Dnaja4	10.536	14.676	6.396	-1.084	0.132	-3.782	1.6e-4	0.001
ENSMUSG00000039693.11	Msantd3	32.476	44.488	20.463	-1.084	0.099	-4.308	1.6e-5	1.9e-4
ENSMUSG00000034792.8	Gna15	2.982	4.41	1.553	-1.083	0.253	-2.536	0.011	0.057
ENSMUSG00000003131.7	Pafah1b2	55.473	75.713	35.233	-1.082	0.087	-2.944	0.003	0.02
ENSMUSG00000032231.14	Anxa2	623.992	847.98	400.005	-1.082	0.106	-4.191	2.8e-5	3.0e-4
ENSMUSG00000023348.11	Trip6	23.992	32.948	15.036	-1.082	0.122	-4.63	3.7e-6	4.7e-5
ENSMUSG00000024736.14	Tmem132a	24.86	34.126	15.595	-1.082	0.135	-3.714	2.0e-4	0.002
ENSMUSG00000111817.1	Gm47154	0.558	1.117	0	-1.082	4.001	-0.512	0.609	0.888
ENSMUSG00000035356.16	Nfkbiz	18.439	25.404	11.475	-1.082	0.135	-3.843	1.2e-4	0.001
ENSMUSG00000095845.3	Gm5741	1.265	2.076	0.454	-1.082	1.619	-0.99	0.322	0.671
ENSMUSG00000028656.14	Cap1	219.957	299.089	140.825	-1.081	0.086	-4.946	7.6e-7	1.1e-5
ENSMUSG00000028007.13	Snx7	22.886	31.438	14.334	-1.081	0.126	-3.382	7.2e-4	0.005
ENSMUSG00000019189.13	Rnf145	38.013	51.978	24.048	-1.081	0.112	-2.203	0.028	0.119
ENSMUSG00000030089.15	Slc41a3	1.746	2.729	0.763	-1.081	0.264	-4.523	6.1e-6	7.5e-5
ENSMUSG00000026478.14	Lamc1	39.279	53.689	24.868	-1.08	0.078	-5.931	3.0e-9	6.2e-8
ENSMUSG00000113850.1	Gm47191	1.444	2.318	0.57	-1.08	0.884	-1.307	0.191	0.49
ENSMUSG00000001349.5	Cnn1	214.974	292.183	137.766	-1.079	0.116	-3.218	0.001	0.009
ENSMUSG00000069892.9	9930111J21Rik2	18.951	26.08	11.822	-1.079	0.116	-4.533	5.8e-6	7.2e-5
ENSMUSG00000043079.17	Synpo	20.93	28.763	13.097	-1.078	0.304	-2.097	0.036	0.147
ENSMUSG00000051048.17	P4ha3	3.289	4.821	1.757	-1.078	0.3	-2.792	0.005	0.03
ENSMUSG00000111551.1	Gm48128	1.299	2.12	0.478	-1.078	0.387	-3.824	1.3e-4	0.001
ENSMUSG00000016487.15	Ppfibp1	96.361	131.126	61.596	-1.078	0.077	-4.243	2.2e-5	2.4e-4
ENSMUSG00000109975.1	Gm19196	3.268	4.791	1.744	-1.077	0.869	-1.003	0.316	0.663
ENSMUSG00000021493.15	Pdlim7	228.567	310.498	146.636	-1.077	0.113	-3.91	9.2e-5	8.8e-4
ENSMUSG00000055865.8	Fam19a3	7.69	10.791	4.589	-1.077	0.435	-0.101	0.92	0.967
ENSMUSG00000030102.11	Itpr1	23.294	31.962	14.626	-1.077	0.089	-4.829	1.4e-6	1.9e-5
ENSMUSG00000044807.13	Zfp354c	1.159	1.929	0.389	-1.077	0.318	-2.676	0.007	0.041
ENSMUSG00000005107.13	Slc2a9	1.843	2.858	0.829	-1.077	0.323	-2.578	0.01	0.052
ENSMUSG00000031996.17	Aplp2	282.659	383.811	181.508	-1.076	0.107	-4.206	2.6e-5	2.8e-4
ENSMUSG00000042357.2	Gjb5	2.633	3.927	1.338	-1.076	0.269	-3.387	7.1e-4	0.005
ENSMUSG00000027913.5	Crct1	7.86	11.017	4.704	-1.075	0.3	-2.023	0.043	0.168
ENSMUSG00000022385.11	Gtse1	11.597	16.085	7.109	-1.075	0.128	-4.144	3.4e-5	3.6e-4
ENSMUSG00000022358.7	Fbxo32	5.057	7.215	2.899	-1.075	0.122	-5.378	7.5e-8	1.3e-6
ENSMUSG00000072964.14	Bhlhb9	7.755	10.873	4.636	-1.075	0.135	-3.789	1.5e-4	0.001
ENSMUSG00000059195.10	Gm12715	0.974	1.676	0.271	-1.074	0.833	-2.52	0.012	0.059
ENSMUSG00000036172.17	Cd200r3	1.307	2.128	0.486	-1.073	0.581	-2.501	0.012	0.062
ENSMUSG00000021665.9	Hexb	30.859	42.189	19.528	-1.073	0.107	-4.233	2.3e-5	2.5e-4
ENSMUSG00000021411.16	Pxdc1	33.12	45.252	20.988	-1.073	0.104	-2.675	0.007	0.041
ENSMUSG00000022519.14	Srl	2.895	4.28	1.511	-1.073	0.272	-1.462	0.144	0.404
ENSMUSG00000025856.15	Pdgfa	64.705	88.055	41.354	-1.072	0.087	-5.465	4.6e-8	8.2e-7
ENSMUSG00000025473.16	Adam8	63.183	85.99	40.375	-1.072	0.121	-3.656	2.6e-4	0.002
ENSMUSG00000070034.13	Sp110	2.165	3.289	1.04	-1.072	0.298	-2.317	0.021	0.094
ENSMUSG00000029122.11	Evc	3.908	5.651	2.165	-1.071	0.163	-4.581	4.6e-6	5.9e-5
ENSMUSG00000020097.14	Sgpl1	61.419	83.574	39.263	-1.071	0.095	-5.44	5.3e-8	9.3e-7
ENSMUSG00000035914.11	Cd276	22.236	30.48	13.992	-1.07	0.129	-3.584	3.4e-4	0.003
ENSMUSG00000028063.15	Lmna	182.39	247.446	117.334	-1.07	0.105	-3.711	2.1e-4	0.002
ENSMUSG00000027555.8	Car13	5.539	7.858	3.221	-1.07	0.209	-3.085	0.002	0.013
ENSMUSG00000030103.11	Bhlhe40	129.429	175.674	83.183	-1.069	0.102	-3.866	1.1e-4	0.001
ENSMUSG00000025232.8	Hexa	34.267	46.769	21.764	-1.069	0.11	-4.186	2.8e-5	3.0e-4
ENSMUSG00000034777.2	Vax2	2.177	3.303	1.05	-1.069	0.348	-2.794	0.005	0.03
ENSMUSG00000030662.10	Ipo5	64.371	87.544	41.199	-1.069	0.07	-6.221	5.0e-10	1.1e-8
ENSMUSG00000028465.16	Tln1	91.323	124.048	58.599	-1.069	0.115	-4.038	5.4e-5	5.4e-4
ENSMUSG00000062937.7	Mtap	26.459	36.189	16.729	-1.069	0.126	-3.818	1.3e-4	0.001
ENSMUSG00000102627.1	Snurf	1.419	2.276	0.562	-1.069	2.956	-0.431	0.666	0.92
ENSMUSG00000039775.7	Defb3	0.97	1.668	0.272	-1.068	2.428	-0.785	0.433	0.784
ENSMUSG00000036158.12	Prickle1	6.781	9.537	4.025	-1.068	0.123	-4.752	2.0e-6	2.7e-5
ENSMUSG00000001707.8	Eef1e1	19.662	26.978	12.346	-1.068	0.127	-2.627	0.009	0.046
ENSMUSG00000031508.14	Ankrd10	16.068	22.108	10.028	-1.067	0.114	-3.385	7.1e-4	0.005
ENSMUSG00000022973.17	Synj1	12.189	16.855	7.523	-1.067	0.129	-2.474	0.013	0.066
ENSMUSG00000034758.12	Tle6	5.455	7.738	3.171	-1.067	0.3	-2.452	0.014	0.069
ENSMUSG00000058905.5	Gm10051	0.547	1.094	0	-1.067	2.071	-1.959	0.05	0.188
ENSMUSG00000039646.5	Vasn	21.796	29.855	13.736	-1.066	0.103	-4.766	1.9e-6	2.5e-5
ENSMUSG00000039286.12	Fndc3b	41.002	55.838	26.166	-1.065	0.091	-2.948	0.003	0.02
ENSMUSG00000026404.12	Ddx59	3.675	5.325	2.024	-1.065	0.224	-2.422	0.015	0.074
ENSMUSG00000053338.9	Tarm1	1.206	1.985	0.427	-1.065	0.54	-3.6	3.2e-4	0.003
ENSMUSG00000030231.11	Plekha5	20.748	28.424	13.071	-1.064	0.102	-3.818	1.3e-4	0.001
ENSMUSG00000006576.16	Slc4a3	7.15	10.026	4.273	-1.064	0.14	-2.445	0.014	0.07
ENSMUSG00000036078.16	Sigmar1	36.829	50.179	23.478	-1.064	0.111	-3.792	1.5e-4	0.001
ENSMUSG00000020048.13	Hsp90b1	411.075	556.46	265.691	-1.064	0.078	-5.214	1.8e-7	2.9e-6
ENSMUSG00000024421.16	Lama3	34.525	47.059	21.992	-1.064	0.101	-4.44	9.0e-6	1.1e-4
ENSMUSG00000024053.10	Emilin2	1.204	1.981	0.426	-1.064	0.274	-5.769	8.0e-9	1.6e-7
ENSMUSG00000068566.12	Myadm	185.407	251.145	119.668	-1.063	0.089	-4.917	8.8e-7	1.2e-5
ENSMUSG00000078566.8	Bnip3	28.245	38.559	17.932	-1.063	0.128	-3.333	8.6e-4	0.006
ENSMUSG00000053581.13	Zfand2a	30.257	41.274	19.24	-1.063	0.122	-2.643	0.008	0.044
ENSMUSG00000034463.4	Scara3	26.589	36.313	16.865	-1.063	0.143	-3.318	9.1e-4	0.007
ENSMUSG00000005355.9	Casp14	7.658	10.709	4.606	-1.062	0.165	-3.526	4.2e-4	0.003
ENSMUSG00000022952.16	Runx1	18.905	25.92	11.89	-1.062	0.14	-2.999	0.003	0.017
ENSMUSG00000064247.14	Plcxd1	2.647	3.931	1.362	-1.062	0.277	0.5	0.617	0.893
ENSMUSG00000020326.7	Ccng1	158.102	214.138	102.066	-1.062	0.104	-4.156	3.2e-5	3.4e-4
ENSMUSG00000031253.15	Srpx2	2.72	4.03	1.41	-1.062	0.414	-2.184	0.029	0.123
ENSMUSG00000034342.9	Cbl	12.077	16.682	7.472	-1.061	0.089	-3.819	1.3e-4	0.001
ENSMUSG00000038181.16	Chpf2	30.852	42.066	19.638	-1.061	0.106	-2.171	0.03	0.127
ENSMUSG00000038615.17	Nfe2l1	165.932	224.698	107.165	-1.061	0.073	-1.871	0.061	0.22
ENSMUSG00000041298.15	Katnal1	6.472	9.102	3.842	-1.061	0.133	-3.168	0.002	0.011
ENSMUSG00000045349.15	Sh2d5	2.464	3.683	1.245	-1.061	0.23	-2.873	0.004	0.024
ENSMUSG00000022048.8	Dpysl2	2.173	3.29	1.056	-1.061	0.215	-4.596	4.3e-6	5.5e-5
ENSMUSG00000026730.12	Pter	8.624	12.011	5.237	-1.061	0.168	-3.113	0.002	0.012
ENSMUSG00000003316.14	Glg1	31.984	43.59	20.378	-1.061	0.096	-4.055	5.0e-5	5.1e-4
ENSMUSG00000004665.10	Cnn2	283.779	383.984	183.575	-1.061	0.111	-3.946	8.0e-5	7.7e-4
ENSMUSG00000051579.10	Tceal8	90.338	122.474	58.202	-1.06	0.1	-4.35	1.4e-5	1.6e-4
ENSMUSG00000005057.13	Sh2b2	1.791	2.773	0.809	-1.06	0.295	-3.912	9.2e-5	8.8e-4
ENSMUSG00000027210.20	Meis2	2.877	4.241	1.513	-1.06	0.242	-3.587	3.3e-4	0.003
ENSMUSG00000004508.6	Gab2	6.234	8.778	3.69	-1.06	0.112	-5.046	4.5e-7	6.8e-6
ENSMUSG00000092296.1	Gm20454	0.542	1.085	0	-1.06	4.044	-0.372	0.71	0.925
ENSMUSG00000016946.5	Kctd5	41.14	55.957	26.324	-1.06	0.093	-4.714	2.4e-6	3.2e-5
ENSMUSG00000050541.14	Adra1b	3.424	4.98	1.869	-1.06	0.222	-3.403	6.7e-4	0.005
ENSMUSG00000022656.15	Nectin3	14.862	20.438	9.286	-1.06	0.149	-3.275	0.001	0.008
ENSMUSG00000037706.17	Cd81	294.796	398.743	190.849	-1.059	0.114	-3.684	2.3e-4	0.002
ENSMUSG00000057666.18	Gapdh	1657.16	2239.74	1074.57	-1.059	0.092	-4.49	7.1e-6	8.6e-5
ENSMUSG00000028664.14	Ephb2	3.983	5.733	2.232	-1.059	0.177	-4.165	3.1e-5	3.3e-4
ENSMUSG00000034487.4	Kdelc2	5.264	7.465	3.064	-1.059	0.14	-3.594	3.3e-4	0.003
ENSMUSG00000009112.4	Bcl2l13	17.345	23.787	10.902	-1.058	0.094	0.453	0.65	0.915
ENSMUSG00000062683.11	Atp5g2	9.613	13.339	5.887	-1.058	0.351	-1.477	0.14	0.397
ENSMUSG00000028444.17	Cntfr	12.271	16.931	7.612	-1.058	0.143	-3.351	8.0e-4	0.006
ENSMUSG00000067925.4	Rtl8a	18.124	24.837	11.41	-1.058	0.148	-3.153	0.002	0.011
ENSMUSG00000037536.14	Fbxo34	10.56	14.618	6.503	-1.058	0.128	-1.761	0.078	0.262
ENSMUSG00000028128.13	F3	553.918	748.639	359.198	-1.057	0.095	-4.355	1.3e-5	1.5e-4
ENSMUSG00000024776.17	Stambpl1	18.204	24.939	11.469	-1.057	0.138	-4.097	4.2e-5	4.4e-4
ENSMUSG00000031266.6	Gla	5.475	7.746	3.204	-1.057	0.146	-3.477	5.1e-4	0.004
ENSMUSG00000033910.13	Gucy1a1	0.702	1.299	0.105	-1.057	0.401	-7.569	3.8e-14	1.4e-12
ENSMUSG00000027894.14	Slc6a17	1.619	2.538	0.701	-1.057	0.245	-2.948	0.003	0.02
ENSMUSG00000020846.6	Rflnb	48.865	66.351	31.379	-1.057	0.127	-3.437	5.9e-4	0.005
ENSMUSG00000028773.8	Fabp3	3.072	4.5	1.644	-1.057	0.414	-1.868	0.062	0.221
ENSMUSG00000020000.7	Moxd1	9.044	12.566	5.523	-1.056	0.174	-3.205	0.001	0.009
ENSMUSG00000009035.15	Tmem184b	82.436	111.685	53.187	-1.056	0.097	-3.803	1.4e-4	0.001
ENSMUSG00000036242.15	3632451O06Rik	2.284	3.436	1.133	-1.056	0.243	-2.906	0.004	0.022
ENSMUSG00000021693.20	Kif2a	17.717	24.277	11.158	-1.056	0.093	-4.306	1.7e-5	1.9e-4
ENSMUSG00000114870.1	AC163667.3	0.54	1.079	0	-1.056	4.044	-0.372	0.71	0.925
ENSMUSG00000022092.11	Ppp3cc	4.202	6.025	2.379	-1.056	0.226	-3.084	0.002	0.014
ENSMUSG00000030790.15	Adm	49.25	66.857	31.643	-1.056	0.126	-3.216	0.001	0.009
ENSMUSG00000025932.14	Eya1	1.173	1.935	0.412	-1.055	0.377	-5.068	4.0e-7	6.1e-6
ENSMUSG00000036356.15	Csgalnact1	0.857	1.507	0.207	-1.055	0.365	-5.447	5.1e-8	9.0e-7
ENSMUSG00000020953.17	Coch	0.929	1.604	0.254	-1.055	0.389	-5.646	1.6e-8	3.1e-7
ENSMUSG00000066258.13	Trim12a	14.915	20.486	9.344	-1.055	0.185	-2.168	0.03	0.127
ENSMUSG00000024535.15	Snx24	18.099	24.783	11.414	-1.054	0.126	-3.974	7.1e-5	6.9e-4
ENSMUSG00000107283.3	Mpv17	24.078	32.853	15.302	-1.054	0.127	-3.159	0.002	0.011
ENSMUSG00000029576.17	Radil	1.313	2.122	0.504	-1.054	0.268	-3.241	0.001	0.008
ENSMUSG00000040520.7	Manea	7.512	10.489	4.535	-1.054	0.132	-3.967	7.3e-5	7.1e-4
ENSMUSG00000031214.13	Ophn1	5.115	7.254	2.977	-1.054	0.154	-2.797	0.005	0.03
ENSMUSG00000034484.7	Snx2	51.085	69.301	32.87	-1.054	0.09	-4.724	2.3e-6	3.1e-5
ENSMUSG00000072235.6	Tuba1a	428.071	578.077	278.065	-1.053	0.12	-3.545	3.9e-4	0.003
ENSMUSG00000005357.9	Slc1a6	0.856	1.504	0.207	-1.053	1.464	-1.411	0.158	0.431
ENSMUSG00000032012.8	Nectin1	18.21	24.923	11.497	-1.053	0.12	-3.868	1.1e-4	0.001
ENSMUSG00000035245.12	Eogt	16.069	22.032	10.107	-1.052	0.104	-3.299	9.7e-4	0.007
ENSMUSG00000025059.16	Gk	2.321	3.481	1.161	-1.052	0.215	-1.541	0.123	0.364
ENSMUSG00000028496.17	Mllt3	13.537	18.614	8.46	-1.052	0.13	-1.072	0.284	0.624
ENSMUSG00000036943.9	Rab8b	6.139	8.631	3.647	-1.052	0.132	-4.538	5.7e-6	7.0e-5
ENSMUSG00000035769.9	Xylb	1.494	2.365	0.624	-1.051	0.294	-2.447	0.014	0.07
ENSMUSG00000094622.2	Gm3055	2.169	3.274	1.064	-1.05	0.325	-0.697	0.486	0.823
ENSMUSG00000053062.15	Jam2	1.862	2.86	0.864	-1.05	0.281	-5.034	4.8e-7	7.1e-6
ENSMUSG00000074170.5	Plekhf1	3.86	5.555	2.165	-1.05	0.131	-5.386	7.2e-8	1.2e-6
ENSMUSG00000048807.2	Slc35e4	12.077	16.638	7.517	-1.05	0.126	-4.01	6.1e-5	6.0e-4
ENSMUSG00000014329.14	Bicc1	14.401	19.768	9.034	-1.049	0.18	-2.785	0.005	0.031
ENSMUSG00000046324.12	Ermp1	10.679	14.747	6.61	-1.049	0.1	-4.084	4.4e-5	4.6e-4
ENSMUSG00000020592.14	Sdc1	56.012	75.874	36.15	-1.049	0.12	-3.372	7.5e-4	0.006
ENSMUSG00000020009.12	Ifngr1	63.114	85.448	40.781	-1.049	0.12	-3.448	5.6e-4	0.004
ENSMUSG00000078974.10	Sec61g	16.602	22.734	10.471	-1.049	0.193	-2.123	0.034	0.139
ENSMUSG00000060671.12	Atp8b2	18.689	25.545	11.833	-1.049	0.091	-5.874	4.2e-9	8.7e-8
ENSMUSG00000026736.1	4930426L09Rik	1.579	2.477	0.681	-1.048	0.368	-3.322	8.9e-4	0.007
ENSMUSG00000051811.14	Cox6b2	9.374	12.986	5.762	-1.048	0.303	-1.971	0.049	0.185
ENSMUSG00000022074.6	Tnfrsf10b	33.676	45.745	21.608	-1.048	0.11	-4.034	5.5e-5	5.5e-4
ENSMUSG00000037440.8	Vnn1	2.157	3.256	1.059	-1.048	0.3	-3.703	2.1e-4	0.002
ENSMUSG00000004085.14	Map3k20	27.782	37.795	17.769	-1.047	0.115	-3.324	8.9e-4	0.007
ENSMUSG00000042770.8	Hebp1	5.896	8.294	3.498	-1.047	0.237	-2.023	0.043	0.168
ENSMUSG00000026339.18	Ccdc93	7.09	9.901	4.278	-1.046	0.113	-3.012	0.003	0.017
ENSMUSG00000021193.10	Pitrm1	24.511	33.376	15.645	-1.046	0.091	-5.037	4.7e-7	7.1e-6
ENSMUSG00000019843.14	Fyn	16.069	21.999	10.139	-1.046	0.12	-3.839	1.2e-4	0.001
ENSMUSG00000028793.15	Rnf19b	57.011	77.156	36.865	-1.045	0.102	-4.581	4.6e-6	5.9e-5
ENSMUSG00000026833.18	Olfm1	6.49	9.091	3.889	-1.045	0.194	-3.567	3.6e-4	0.003
ENSMUSG00000039323.18	Igfbp2	2749.98	3704.93	1795.03	-1.045	0.147	-2.86	0.004	0.025
ENSMUSG00000043068.6	Fam89a	3.652	5.267	2.038	-1.045	0.256	-2.8	0.005	0.03
ENSMUSG00000029840.8	Mtpn	120.29	162.361	78.219	-1.044	0.087	-4.748	2.1e-6	2.8e-5
ENSMUSG00000032606.7	Nicn1	12.952	17.792	8.113	-1.044	0.135	0.601	0.548	0.869
ENSMUSG00000060279.14	Ap2a1	46.21	62.582	29.838	-1.044	0.084	-3.5	4.6e-4	0.004
ENSMUSG00000058152.7	Chsy3	1.02	1.72	0.32	-1.044	0.358	-5.006	5.6e-7	8.2e-6
ENSMUSG00000021417.15	Eci2	44.637	60.457	28.816	-1.043	0.107	-6.006	1.9e-9	4.0e-8
ENSMUSG00000052316.9	Lrrc15	0.688	1.272	0.103	-1.043	0.346	-8.681	3.9e-18	2.3e-16
ENSMUSG00000034780.6	B3galt1	0.816	1.446	0.187	-1.043	0.447	-3.007	0.003	0.017
ENSMUSG00000022469.16	Rapgef3	2.292	3.433	1.151	-1.043	0.243	-2.101	0.036	0.145
ENSMUSG00000039103.12	Nexn	40.54	54.935	26.145	-1.043	0.106	-3.813	1.4e-4	0.001
ENSMUSG00000105081.1	Gm43110	0.53	1.061	0	-1.043	4.047	-0.362	0.717	0.925
ENSMUSG00000026229.17	Psmd1	82.429	111.329	53.529	-1.043	0.087	-3.777	1.6e-4	0.001
ENSMUSG00000076873.2	Trdv5	0.734	1.334	0.134	-1.042	1.577	-1.727	0.084	0.276
ENSMUSG00000020261.15	Slc36a1	4.441	6.325	2.557	-1.042	0.132	-3.656	2.6e-4	0.002
ENSMUSG00000040441.10	Slc26a10	2.142	3.23	1.054	-1.042	0.347	-1.729	0.084	0.276
ENSMUSG00000027803.14	Wwtr1	33.016	44.793	21.239	-1.042	0.127	-3.506	4.6e-4	0.004
ENSMUSG00000058704.7	Memo1	38.593	52.3	24.886	-1.042	0.122	-3.557	3.7e-4	0.003
ENSMUSG00000047714.14	Ppp1r2	54.901	74.253	35.548	-1.042	0.08	-5.269	1.4e-7	2.2e-6
ENSMUSG00000051149.15	Adnp	8.97	12.42	5.519	-1.042	0.482	-1.265	0.206	0.513
ENSMUSG00000026566.15	Mpzl1	25.416	34.557	16.276	-1.041	0.128	-4.068	4.7e-5	4.8e-4
ENSMUSG00000030609.18	Aen	53.529	72.397	34.662	-1.041	0.083	-5.304	1.1e-7	1.9e-6
ENSMUSG00000096240.1	Gm21830	0.529	1.058	0	-1.041	4.047	-0.362	0.717	0.925
ENSMUSG00000021794.16	Glud1	89.84	121.253	58.426	-1.041	0.093	-3.972	7.1e-5	7.0e-4
ENSMUSG00000114912.1	Gm48049	0.529	1.057	0	-1.041	3.77	-0.568	0.57	0.877
ENSMUSG00000028048.11	Gba	56.133	75.885	36.381	-1.04	0.095	-4.137	3.5e-5	3.7e-4
ENSMUSG00000023495.13	Pcbp4	34.964	47.397	22.532	-1.04	0.136	-3.914	9.1e-5	8.7e-4
ENSMUSG00000050730.17	Arhgap42	9.507	13.139	5.875	-1.04	0.124	-2.576	0.01	0.052
ENSMUSG00000040605.6	Bace2	4.058	5.806	2.31	-1.04	0.194	-3.619	3.0e-4	0.002
ENSMUSG00000029455.14	Aldh2	144.029	194.137	93.92	-1.04	0.092	-4.115	3.9e-5	4.1e-4
ENSMUSG00000028076.12	Cd1d1	3.907	5.602	2.212	-1.04	0.29	-3.353	8.0e-4	0.006
ENSMUSG00000048096.7	Lmod1	21.164	28.82	13.508	-1.039	0.12	-3.62	2.9e-4	0.002
ENSMUSG00000017670.16	Elmo2	16.756	22.889	10.622	-1.039	0.109	-3.788	1.5e-4	0.001
ENSMUSG00000055044.12	Pdlim1	329.683	443.905	215.462	-1.039	0.091	-3.518	4.3e-4	0.004
ENSMUSG00000005417.17	Mprip	113.005	152.367	73.643	-1.039	0.089	-4.391	1.1e-5	1.3e-4
ENSMUSG00000031897.9	Psmb10	24.58	33.409	15.751	-1.039	0.182	-2.557	0.011	0.055
ENSMUSG00000026822.14	Lcn2	4995.35	6719.43	3271.27	-1.038	0.139	-2.882	0.004	0.024
ENSMUSG00000042608.15	Stk40	19.944	27.17	12.717	-1.038	0.097	-3.058	0.002	0.015
ENSMUSG00000042626.13	Shc1	53.613	72.454	34.771	-1.038	0.085	-3.76	1.7e-4	0.002
ENSMUSG00000052310.9	Slc39a1	60.963	82.338	39.588	-1.038	0.089	-4.613	4.0e-6	5.1e-5
ENSMUSG00000038903.13	Ccdc68	5.408	7.618	3.198	-1.038	0.218	-2.846	0.004	0.026
ENSMUSG00000001995.9	Sipa1l2	3.73	5.36	2.1	-1.037	0.16	-4.488	7.2e-6	8.7e-5
ENSMUSG00000115805.1	AC156790.5	0.526	1.052	0	-1.037	4.047	-0.362	0.717	0.925
ENSMUSG00000000253.13	Gmpr	4.634	6.576	2.693	-1.037	0.276	-2.048	0.041	0.161
ENSMUSG00000073234.4	Gm8773	0.821	1.448	0.193	-1.036	0.626	-3.627	2.9e-4	0.002
ENSMUSG00000040918.12	Slc19a2	10.806	14.872	6.74	-1.036	0.123	-4.091	4.3e-5	4.5e-4
ENSMUSG00000019923.14	Zwint	106.777	143.895	69.659	-1.036	0.097	-3.988	6.7e-5	6.6e-4
ENSMUSG00000081769.9	Gm12216	1.226	1.992	0.459	-1.036	0.975	-1.078	0.281	0.62
ENSMUSG00000000958.10	Slc7a7	10.559	14.539	6.579	-1.036	0.14	-2.292	0.022	0.098
ENSMUSG00000040253.15	Gbp7	2.893	4.234	1.553	-1.036	0.214	-3.76	1.7e-4	0.002
ENSMUSG00000034520.14	Gjc1	4.718	6.686	2.749	-1.036	0.184	-4.494	7.0e-6	8.5e-5
ENSMUSG00000057982.8	Zfp809	23.909	32.482	15.337	-1.035	0.131	-3.217	0.001	0.009
ENSMUSG00000041605.16	5730559C18Rik	31.67	42.913	20.427	-1.035	0.113	-3.404	6.6e-4	0.005
ENSMUSG00000004952.13	Rasa4	12.199	16.741	7.657	-1.035	0.111	-3.379	7.3e-4	0.006
ENSMUSG00000084169.1	Gm12240	0.525	1.049	0	-1.035	4.045	-0.367	0.713	0.925
ENSMUSG00000011752.6	Pgam1	283.091	380.84	185.341	-1.035	0.085	-4.615	3.9e-6	5.0e-5
ENSMUSG00000028273.15	Pdlim5	102.024	137.465	66.584	-1.035	0.092	-3.176	0.001	0.01
ENSMUSG00000036934.9	4921524J17Rik	20.367	27.717	13.017	-1.035	0.141	-3.036	0.002	0.015
ENSMUSG00000007041.9	Clic1	240.397	323.435	157.359	-1.035	0.098	-4.064	4.8e-5	4.9e-4
ENSMUSG00000057506.4	Bloc1s2	39.062	52.843	25.281	-1.035	0.131	-3.183	0.001	0.01
ENSMUSG00000042743.13	Sgtb	2.874	4.206	1.542	-1.034	0.195	-3.949	7.8e-5	7.6e-4
ENSMUSG00000075415.13	Fnbp1	15.751	21.511	9.991	-1.034	0.111	-1.85	0.064	0.227
ENSMUSG00000042659.15	Arrdc4	22.344	30.369	14.319	-1.034	0.105	-3.43	6.0e-4	0.005
ENSMUSG00000025579.14	Gaa	44.637	60.324	28.949	-1.034	0.079	-5.042	4.6e-7	6.9e-6
ENSMUSG00000078452.10	Raet1d	4.545	6.452	2.639	-1.034	0.243	-2.11	0.035	0.143
ENSMUSG00000078154.3	Gm12184	1.101	1.823	0.379	-1.034	1.514	-1.089	0.276	0.614
ENSMUSG00000070565.11	Rasal2	2.731	4.013	1.449	-1.034	0.131	-4.161	3.2e-5	3.4e-4
ENSMUSG00000026970.16	Rbms1	57.692	77.86	37.525	-1.034	0.102	-4.061	4.9e-5	5.0e-4
ENSMUSG00000025647.16	Shisa5	135.725	182.695	88.755	-1.033	0.099	-4.468	7.9e-6	9.5e-5
ENSMUSG00000026519.16	Tmem63a	21.681	29.471	13.891	-1.033	0.103	-3.284	0.001	0.007
ENSMUSG00000034751.16	Mast4	14.697	20.088	9.307	-1.033	0.076	-5.804	6.5e-9	1.3e-7
ENSMUSG00000030718.9	Ppme1	38.663	52.276	25.05	-1.032	0.092	-4.242	2.2e-5	2.4e-4
ENSMUSG00000003348.10	Mob3a	22.89	31.088	14.693	-1.032	0.102	-4.044	5.2e-5	5.3e-4
ENSMUSG00000031562.15	Dctd	9.615	13.257	5.973	-1.032	0.152	-3.057	0.002	0.015
ENSMUSG00000082176.1	Gm13163	0.522	1.044	0	-1.032	2.87	-1.144	0.253	0.581
ENSMUSG00000038668.14	Lpar1	7.397	10.276	4.517	-1.031	0.173	-4.109	4.0e-5	4.2e-4
ENSMUSG00000031007.2	Atp6ap2	36.773	49.725	23.82	-1.031	0.093	-4.464	8.0e-6	9.6e-5
ENSMUSG00000023140.4	Reg2	1.348	2.154	0.543	-1.031	0.875	-1.404	0.16	0.435
ENSMUSG00000042677.7	Zc3h12a	28.661	38.83	18.492	-1.031	0.111	-3.96	7.5e-5	7.3e-4
ENSMUSG00000039616.9	Mocos	5.384	7.573	3.196	-1.031	0.145	-4.121	3.8e-5	4.0e-4
ENSMUSG00000078853.8	Igtp	13.556	18.545	8.567	-1.031	0.147	-3.155	0.002	0.011
ENSMUSG00000016128.14	Stard13	3.986	5.694	2.277	-1.031	0.189	-3.091	0.002	0.013
ENSMUSG00000030890.16	Ilk	273.407	367.444	179.37	-1.03	0.078	-5.068	4.0e-7	6.1e-6
ENSMUSG00000021190.14	Lgmn	25.339	34.363	16.314	-1.03	0.133	-3.436	5.9e-4	0.005
ENSMUSG00000035900.18	Gramd4	10.31	14.186	6.435	-1.03	0.157	-3.239	0.001	0.009
ENSMUSG00000108218.2	Olfr1372-ps1	15.542	21.209	9.875	-1.03	0.113	-2.412	0.016	0.076
ENSMUSG00000022965.7	Ifngr2	40.764	55.067	26.46	-1.03	0.11	-3.708	2.1e-4	0.002
ENSMUSG00000078897.10	Gm4724	7.193	9.999	4.388	-1.03	0.276	-2.059	0.039	0.157
ENSMUSG00000007783.10	Cpt1c	12.663	17.342	7.984	-1.03	0.12	-5.39	7.0e-8	1.2e-6
ENSMUSG00000036533.8	Cdc42ep3	28.373	38.429	18.318	-1.029	0.107	-3.979	6.9e-5	6.8e-4
ENSMUSG00000028039.11	Efna3	1.699	2.623	0.775	-1.029	0.336	-0.549	0.583	0.884
ENSMUSG00000028072.6	Ntrk1	0.802	1.419	0.186	-1.028	0.417	-5.431	5.6e-8	9.8e-7
ENSMUSG00000038702.6	Dsel	4.569	6.474	2.665	-1.028	0.144	-4.782	1.7e-6	2.4e-5
ENSMUSG00000081551.1	Gm14654	1.247	2.015	0.479	-1.027	1.023	-1.312	0.189	0.487
ENSMUSG00000003992.14	Ssbp2	3.232	4.678	1.787	-1.027	0.266	-2.163	0.031	0.129
ENSMUSG00000042594.16	Sh2b3	10.204	14.031	6.377	-1.027	0.117	-3.604	3.1e-4	0.003
ENSMUSG00000024424.14	Ttc39c	6.819	9.489	4.149	-1.027	0.168	-3.95	7.8e-5	7.6e-4
ENSMUSG00000050821.13	Fam131a	5.779	8.094	3.464	-1.027	0.171	-3.699	2.2e-4	0.002
ENSMUSG00000002688.8	Prkd1	3.379	4.875	1.884	-1.026	0.191	-3.817	1.4e-4	0.001
ENSMUSG00000019853.6	Hebp2	11.258	15.44	7.076	-1.026	0.148	-1.899	0.058	0.209
ENSMUSG00000019487.11	Trip10	47.648	64.244	31.051	-1.025	0.104	-3.427	6.1e-4	0.005
ENSMUSG00000036002.12	Fam214b	39.298	53.045	25.551	-1.025	0.083	-4.568	4.9e-6	6.2e-5
ENSMUSG00000027312.14	Atrn	14.348	19.581	9.114	-1.025	0.095	-4.891	1.0e-6	1.4e-5
ENSMUSG00000000305.12	Cdh4	1.734	2.666	0.802	-1.025	0.406	0.138	0.891	0.953
ENSMUSG00000040296.15	Ddx58	25.32	34.292	16.349	-1.024	0.112	-3.996	6.4e-5	6.4e-4
ENSMUSG00000090100.7	Ttbk2	2.667	3.917	1.417	-1.024	0.141	-2.968	0.003	0.019
ENSMUSG00000043885.14	Slc36a4	1.265	2.037	0.493	-1.024	0.224	-7.711	1.3e-14	5.0e-13
ENSMUSG00000021728.8	Emb	16.743	22.787	10.698	-1.024	0.117	-3.81	1.4e-4	0.001
ENSMUSG00000027198.16	Ext2	47.831	64.467	31.195	-1.024	0.107	-3.789	1.5e-4	0.001
ENSMUSG00000028525.16	Pde4b	8.454	11.674	5.233	-1.024	0.143	-3.203	0.001	0.01
ENSMUSG00000034401.16	Spata6	13.282	18.146	8.418	-1.024	0.15	-2.861	0.004	0.025
ENSMUSG00000030246.11	Ldhb	20.099	27.284	12.913	-1.024	0.165	-2.61	0.009	0.048
ENSMUSG00000003032.8	Klf4	9.814	13.497	6.131	-1.024	0.12	-3.678	2.4e-4	0.002
ENSMUSG00000024014.7	Pim1	18.822	25.573	12.072	-1.023	0.119	-3.672	2.4e-4	0.002
ENSMUSG00000021347.3	Prl7b1	0.885	1.526	0.243	-1.023	0.84	-2.463	0.014	0.068
ENSMUSG00000028792.14	Ak2	37.939	51.196	24.682	-1.023	0.091	-4.115	3.9e-5	4.1e-4
ENSMUSG00000028990.13	Lzic	25.146	34.036	16.255	-1.022	0.117	-2.201	0.028	0.119
ENSMUSG00000076550.3	Igkv4-63	0.515	1.03	0	-1.022	2.95	-0.885	0.376	0.73
ENSMUSG00000026718.17	Stam	23.821	32.255	15.387	-1.021	0.114	-2.596	0.009	0.05
ENSMUSG00000090467.3	Gm4613	0.515	1.029	0	-1.021	3.746	-0.579	0.563	0.877
ENSMUSG00000066407.3	Gm10263	0.839	1.463	0.214	-1.021	2.92	-0.727	0.467	0.81
ENSMUSG00000025408.15	Ddit3	53.969	72.632	35.306	-1.02	0.11	-3.61	3.1e-4	0.003
ENSMUSG00000026639.18	Lamb3	55.734	74.995	36.472	-1.02	0.078	-4.706	2.5e-6	3.4e-5
ENSMUSG00000030768.12	Disp1	5.561	7.787	3.335	-1.019	0.156	-3.172	0.002	0.01
ENSMUSG00000011837.4	Snapc2	18.126	24.614	11.639	-1.019	0.133	-3.304	9.5e-4	0.007
ENSMUSG00000089901.1	Gm8113	16.588	22.553	10.624	-1.019	0.113	-3.862	1.1e-4	0.001
ENSMUSG00000002458.13	Rgs19	28.313	38.245	18.381	-1.018	0.148	-3.336	8.5e-4	0.006
ENSMUSG00000039959.13	Hip1	6.771	9.404	4.139	-1.018	0.133	-3.317	9.1e-4	0.007
ENSMUSG00000026914.15	Psmd14	61.884	83.187	40.581	-1.018	0.121	-2.974	0.003	0.018
ENSMUSG00000031482.9	Slc25a15	6.069	8.463	3.675	-1.017	0.127	-4.367	1.3e-5	1.5e-4
ENSMUSG00000021040.15	Slirp	16.314	22.174	10.454	-1.017	0.15	-1.342	0.18	0.47
ENSMUSG00000022144.4	Gdnf	0.827	1.445	0.208	-1.017	0.33	-6.46	1.0e-10	2.6e-9
ENSMUSG00000049090.2	Zadh2	12.179	16.639	7.719	-1.017	0.114	-3.885	1.0e-4	9.7e-4
ENSMUSG00000025790.14	Slco3a1	18.377	24.932	11.821	-1.016	0.116	-3.864	1.1e-4	0.001
ENSMUSG00000027775.9	Mfsd1	49.774	66.943	32.606	-1.016	0.105	-1.844	0.065	0.229
ENSMUSG00000079523.8	Tmsb10	2130.66	2851.23	1410.08	-1.015	0.125	-3.144	0.002	0.011
ENSMUSG00000033033.10	Calhm2	3.698	5.286	2.111	-1.015	0.178	-3.759	1.7e-4	0.002
ENSMUSG00000035557.9	Krt17	689.193	922.294	456.091	-1.014	0.103	-3.561	3.7e-4	0.003
ENSMUSG00000070044.15	Fam149a	16.804	22.814	10.793	-1.014	0.133	-3.092	0.002	0.013
ENSMUSG00000003402.14	Prkcsh	117.373	157.33	77.416	-1.014	0.079	-4.692	2.7e-6	3.6e-5
ENSMUSG00000025034.8	Trim8	29.296	39.52	19.072	-1.013	0.152	-2.677	0.007	0.041
ENSMUSG00000084238.1	Gm13076	1.232	1.985	0.479	-1.013	3.264	-0.414	0.679	0.925
ENSMUSG00000022412.14	Mief1	10.722	14.677	6.767	-1.013	0.109	-1.826	0.068	0.236
ENSMUSG00000056498.13	Tmem154	3.299	4.75	1.849	-1.013	0.181	-3.465	5.3e-4	0.004
ENSMUSG00000045103.17	Dmd	17.569	23.835	11.304	-1.013	0.103	-3.123	0.002	0.012
ENSMUSG00000025521.15	Tmem192	23.199	31.36	15.038	-1.013	0.138	-2.645	0.008	0.044
ENSMUSG00000073102.7	Drc1	2.087	3.128	1.046	-1.013	0.576	-1.861	0.063	0.223
ENSMUSG00000059552.13	Trp53	78.563	105.39	51.735	-1.013	0.092	-4.169	3.1e-5	3.3e-4
ENSMUSG00000019528.18	Gyg	25.423	34.332	16.514	-1.012	0.107	-3.763	1.7e-4	0.001
ENSMUSG00000071551.13	Akr1c19	1.89	2.864	0.916	-1.012	0.449	-2.3	0.021	0.097
ENSMUSG00000028405.9	Aco1	15.84	21.517	10.162	-1.012	0.095	-4.533	5.8e-6	7.2e-5
ENSMUSG00000006369.14	Fbln1	2.351	3.481	1.221	-1.012	0.243	-3.37	7.5e-4	0.006
ENSMUSG00000026643.16	Nmt2	16.777	22.769	10.785	-1.012	0.11	-2.456	0.014	0.069
ENSMUSG00000026418.16	Tnni1	1.046	1.735	0.356	-1.012	0.587	-1.937	0.053	0.195
ENSMUSG00000031098.18	Syt8	10.365	14.195	6.534	-1.012	0.231	-1.635	0.102	0.318
ENSMUSG00000033955.12	Tnks1bp1	66.736	89.556	43.916	-1.012	0.099	-3.232	0.001	0.009
ENSMUSG00000031485.15	Plpbp	22.593	30.54	14.646	-1.011	0.098	-3.262	0.001	0.008
ENSMUSG00000094472.1	Gm21897	1.889	2.862	0.916	-1.011	0.388	-2.509	0.012	0.061
ENSMUSG00000027247.16	Arhgap1	56.831	76.302	37.359	-1.011	0.082	-4.637	3.5e-6	4.6e-5
ENSMUSG00000062980.15	Cped1	1.459	2.287	0.631	-1.011	0.254	-5.835	5.4e-9	1.1e-7
ENSMUSG00000037379.7	Spon2	36.325	48.888	23.762	-1.011	0.095	-3.625	2.9e-4	0.002
ENSMUSG00000046818.7	Ddit4l	10.697	14.633	6.761	-1.01	0.151	-2.695	0.007	0.039
ENSMUSG00000021745.14	Ptprg	27.694	37.346	18.042	-1.01	0.1	-2.627	0.009	0.046
ENSMUSG00000039166.16	Akap7	7.427	10.262	4.593	-1.01	0.192	-1.99	0.047	0.179
ENSMUSG00000022436.16	Sh3bp1	13.367	18.199	8.535	-1.01	0.144	-5.012	5.4e-7	7.9e-6
ENSMUSG00000056220.14	Pla2g4a	54.4	73.032	35.769	-1.01	0.138	-3.102	0.002	0.013
ENSMUSG00000039377.7	Hlx	1.244	1.999	0.489	-1.01	0.406	-3.197	0.001	0.01
ENSMUSG00000025481.12	Urah	20.447	27.658	13.235	-1.009	0.182	-2.357	0.018	0.086
ENSMUSG00000091096.1	Gm17304	0.506	1.013	0	-1.009	4.045	-0.367	0.713	0.925
ENSMUSG00000019564.12	Arid3a	3.415	4.899	1.931	-1.009	0.146	-3.026	0.002	0.016
ENSMUSG00000062098.11	Btbd3	9.678	13.266	6.09	-1.009	0.102	-4.796	1.6e-6	2.2e-5
ENSMUSG00000079037.9	Prnp	134.854	180.502	89.205	-1.009	0.072	-4.953	7.3e-7	1.1e-5
ENSMUSG00000036052.14	Dnajb5	10.548	14.428	6.668	-1.009	0.128	-2.219	0.026	0.115
ENSMUSG00000051439.6	Cd14	50.784	68.178	33.39	-1.008	0.182	-2.243	0.025	0.109
ENSMUSG00000004317.14	Clcn5	19.24	26.039	12.442	-1.008	0.1	-3.039	0.002	0.015
ENSMUSG00000033287.16	Kctd17	50.414	67.682	33.146	-1.008	0.119	-3.425	6.2e-4	0.005
ENSMUSG00000044080.9	S100a1	36.895	49.622	24.167	-1.008	0.162	-2.298	0.022	0.097
ENSMUSG00000083404.1	Gm13019	0.506	1.011	0	-1.008	4.001	-0.512	0.609	0.888
ENSMUSG00000049957.14	Ccdc137	15.864	21.527	10.2	-1.008	0.144	-1.168	0.243	0.568
ENSMUSG00000046879.7	Irgm1	88.607	118.701	58.514	-1.008	0.118	-3.28	0.001	0.008
ENSMUSG00000030084.11	Plxna1	36.869	49.585	24.153	-1.008	0.096	-3.475	5.1e-4	0.004
ENSMUSG00000024168.7	Tmem204	1.756	2.682	0.831	-1.008	0.325	-3.155	0.002	0.011
ENSMUSG00000001833.17	Sept7	67.104	89.97	44.238	-1.008	0.096	-3.776	1.6e-4	0.001
ENSMUSG00000029212.11	Gabrb1	0.772	1.367	0.177	-1.008	0.319	-9.414	4.8e-21	3.4e-19
ENSMUSG00000068758.8	Il3ra	16.037	21.756	10.319	-1.007	0.139	-3.133	0.002	0.012
ENSMUSG00000030341.17	Tnfrsf1a	46.767	62.798	30.736	-1.007	0.09	-4.429	9.5e-6	1.1e-4
ENSMUSG00000026107.11	Nabp1	77.279	103.539	51.018	-1.007	0.141	-2.293	0.022	0.098
ENSMUSG00000005054.7	Cstb	343.455	459.002	227.907	-1.007	0.122	-2.945	0.003	0.02
ENSMUSG00000032656.14	March3	4.226	5.979	2.473	-1.007	0.287	-1.535	0.125	0.367
ENSMUSG00000021798.14	Ldb3	1.239	1.989	0.488	-1.007	0.257	-3.678	2.3e-4	0.002
ENSMUSG00000023905.14	Tnfrsf12a	329.861	440.833	218.889	-1.007	0.121	-3.145	0.002	0.011
ENSMUSG00000079175.1	Gm11060	0.505	1.009	0	-1.007	4.024	-0.429	0.668	0.92
ENSMUSG00000031617.16	Tmem184c	23.715	32.002	15.427	-1.006	0.098	-2.378	0.017	0.082
ENSMUSG00000026452.15	Syt2	2.049	3.072	1.027	-1.006	0.504	-0.166	0.868	0.945
ENSMUSG00000054920.12	Klhl5	9.919	13.58	6.259	-1.006	0.159	-2.994	0.003	0.017
ENSMUSG00000041506.15	Rrp9	26.05	35.117	16.983	-1.006	0.106	-2.752	0.006	0.034
ENSMUSG00000032786.16	Alas1	71.871	96.292	47.45	-1.006	0.105	-3.878	1.1e-4	9.9e-4
ENSMUSG00000024479.3	Mal2	30.204	40.661	19.747	-1.006	0.138	-2.936	0.003	0.02
ENSMUSG00000056737.14	Capg	218.349	291.852	144.845	-1.006	0.072	-4.844	1.3e-6	1.8e-5
ENSMUSG00000046550.8	Spin2c	2.945	4.267	1.623	-1.006	0.427	-2.25	0.024	0.108
ENSMUSG00000032112.10	Trappc4	64.401	86.316	42.487	-1.006	0.112	-2.817	0.005	0.028
ENSMUSG00000037375.16	Hhat	3.064	4.426	1.702	-1.006	0.229	-2.636	0.008	0.045
ENSMUSG00000053702.16	Nebl	3.38	4.848	1.913	-1.006	0.149	-2.772	0.006	0.032
ENSMUSG00000030512.13	Snrpa1	33.312	44.806	21.818	-1.005	0.118	-3.472	5.2e-4	0.004
ENSMUSG00000021403.3	Serpinb9b	18.702	25.3	12.103	-1.005	0.172	-2.669	0.008	0.041
ENSMUSG00000023075.9	Akirin1	33.758	45.399	22.117	-1.005	0.101	-3.767	1.7e-4	0.001
ENSMUSG00000068893.5	Sprr2a2	218.195	291.604	144.787	-1.005	0.139	-2.735	0.006	0.035
ENSMUSG00000027580.17	Helz2	8.483	11.658	5.308	-1.005	0.086	-5.388	7.1e-8	1.2e-6
ENSMUSG00000079477.9	Rab7	183.967	245.877	122.057	-1.004	0.074	-3.119	0.002	0.012
ENSMUSG00000064254.6	Ethe1	13.738	18.67	8.806	-1.004	0.141	-2.964	0.003	0.019
ENSMUSG00000057789.13	Bak1	55.304	74.143	36.465	-1.004	0.11	-3.259	0.001	0.008
ENSMUSG00000027859.10	Ngf	30.547	41.1	19.993	-1.004	0.181	-2.404	0.016	0.077
ENSMUSG00000032060.10	Cryab	426.64	569.704	283.576	-1.004	0.102	-3.323	8.9e-4	0.007
ENSMUSG00000029207.16	Apbb2	14.119	19.177	9.062	-1.004	0.124	-2.97	0.003	0.019
ENSMUSG00000039519.6	Cyp7b1	1.298	2.067	0.53	-1.003	0.401	-3.193	0.001	0.01
ENSMUSG00000036499.9	Eea1	9.243	12.668	5.818	-1.003	0.087	-5.185	2.2e-7	3.4e-6
ENSMUSG00000053846.4	Lipg	3.213	4.622	1.804	-1.003	0.169	-4.194	2.7e-5	2.9e-4
ENSMUSG00000028041.17	Adam15	44.59	59.83	29.349	-1.003	0.104	-4.635	3.6e-6	4.6e-5
ENSMUSG00000022817.14	Itgb5	61.336	82.171	40.502	-1.003	0.097	-3.632	2.8e-4	0.002
ENSMUSG00000066232.4	Ipo7	59.137	79.236	39.039	-1.003	0.077	-4.811	1.5e-6	2.1e-5
ENSMUSG00000032602.6	Slc25a20	15.554	21.086	10.022	-1.003	0.125	-3.474	5.1e-4	0.004
ENSMUSG00000022362.13	Gm29394	1.58	2.443	0.718	-1.003	0.954	-0.01	0.992	0.996
ENSMUSG00000028156.12	Eif4e	69.761	93.408	46.114	-1.003	0.091	-3.515	4.4e-4	0.004
ENSMUSG00000046668.8	Cxxc5	8.869	12.165	5.572	-1.002	0.175	-2.806	0.005	0.029
ENSMUSG00000038305.14	Spats2l	4.326	6.105	2.547	-1.002	0.215	-4.159	3.2e-5	3.4e-4
ENSMUSG00000030218.2	Mgp	6.565	9.091	4.038	-1.002	0.372	-1.249	0.212	0.521
ENSMUSG00000042719.17	Naa25	15.156	20.551	9.76	-1.002	0.096	-2.445	0.014	0.07
ENSMUSG00000074151.13	Nlrc5	2.187	3.252	1.123	-1.002	0.251	-1.415	0.157	0.429
ENSMUSG00000066043.13	Phactr4	22.618	30.503	14.734	-1.002	0.091	-0.727	0.467	0.81
ENSMUSG00000005615.14	Pcyt1a	14.541	19.728	9.353	-1.001	0.085	-4.074	4.6e-5	4.8e-4
ENSMUSG00000044350.14	Lacc1	2.704	3.941	1.468	-1.001	0.226	-3.241	0.001	0.009
ENSMUSG00000079834.2	Tmlhe	4.027	5.705	2.349	-1.001	0.203	-3.14	0.002	0.011
ENSMUSG00000031792.15	Usb1	15.269	20.698	9.839	-1.001	0.129	-3.042	0.002	0.015
ENSMUSG00000029436.9	Mmp17	1.405	2.207	0.602	-1.001	0.192	-5.582	2.4e-8	4.3e-7
ENSMUSG00000026885.13	Ttll11	1.11	1.815	0.406	-1.001	0.441	-2.512	0.012	0.061
ENSMUSG00000031246.14	Sh3bgrl	44.654	59.89	29.419	-1.001	0.088	-4.276	1.9e-5	2.1e-4
ENSMUSG00000069833.12	Ahnak	34.725	46.643	22.806	-1.001	0.122	-3.41	6.5e-4	0.005
ENSMUSG00000023951.17	Vegfa	80.847	108.152	53.542	-1.001	0.086	-5.434	5.5e-8	9.6e-7
ENSMUSG00000014498.9	Ankrd52	25.194	33.932	16.456	-1.001	0.08	-5.265	1.4e-7	2.3e-6
ENSMUSG00000053025.13	Sv2b	0.666	1.222	0.11	-1.001	0.363	-7.352	2.0e-13	6.9e-12
ENSMUSG00000050989.9	Selenon	30.776	41.376	20.176	-1.001	0.125	-3.347	8.2e-4	0.006
ENSMUSG00000002997.15	Prkar2b	6.068	8.426	3.711	-1.001	0.14	-3.096	0.002	0.013
ENSMUSG00000051323.16	Pcdh19	1.449	2.265	0.632	-1	0.2	-6.183	6.3e-10	1.4e-8
ENSMUSG00000115573.1	AC154718.1	2.017	3.023	1.012	-1	2.035	-0.405	0.685	0.925
ENSMUSG00000021608.15	Lpcat1	7.803	10.737	4.869	-1	0.137	-3.288	0.001	0.007
ENSMUSG00000019718.8	L3hypdh	4.2	5.933	2.467	-1	0.223	-2.618	0.009	0.047
ENSMUSG00000001416.13	Cct3	125.587	167.757	83.417	-0.999	0.077	-4.23	2.3e-5	2.5e-4
ENSMUSG00000074796.10	Slc4a11	16.017	21.686	10.349	-0.999	0.101	-3.254	0.001	0.008
ENSMUSG00000022505.9	Emp2	26.314	35.412	17.216	-0.999	0.114	-3.511	4.5e-4	0.004
ENSMUSG00000038022.11	Mindy4	2.226	3.3	1.152	-0.999	0.301	-1.974	0.048	0.184
ENSMUSG00000028402.18	Mpdz	15.378	20.83	9.926	-0.999	0.091	-5.598	2.2e-8	4.0e-7
ENSMUSG00000004677.17	Myo9b	38.895	52.174	25.616	-0.998	0.094	-2.492	0.013	0.063
ENSMUSG00000075602.10	Ly6a	147.081	196.368	97.793	-0.998	0.149	-2.474	0.013	0.066
ENSMUSG00000000049.11	Apoh	0.693	1.256	0.129	-0.998	1.238	-0.985	0.325	0.674
ENSMUSG00000073405.6	H2-T-ps	2.475	3.631	1.318	-0.998	0.342	-2.37	0.018	0.083
ENSMUSG00000031403.14	Dkc1	10.25	13.993	6.507	-0.998	0.133	-1.592	0.111	0.339
ENSMUSG00000040928.15	S100pbp	9.637	13.176	6.098	-0.998	0.114	-2.716	0.007	0.037
ENSMUSG00000042766.17	Trim46	3.967	5.62	2.315	-0.998	0.211	-2.393	0.017	0.079
ENSMUSG00000022701.17	Ccdc191	4.194	5.922	2.467	-0.998	0.18	1.076	0.282	0.621
ENSMUSG00000030409.15	Dmpk	17.173	23.217	11.13	-0.998	0.208	-3.095	0.002	0.013
ENSMUSG00000037234.17	Hook3	13.906	18.862	8.95	-0.997	0.094	-3.11	0.002	0.013
ENSMUSG00000021583.7	Erap1	17.182	23.227	11.136	-0.997	0.095	-0.107	0.915	0.965
ENSMUSG00000031568.16	Rwdd4a	23.374	31.472	15.276	-0.996	0.107	-0.424	0.672	0.923
ENSMUSG00000063229.15	Ldha	442.955	590.448	295.461	-0.996	0.092	-3.849	1.2e-4	0.001
ENSMUSG00000036197.16	Gxylt1	13.475	18.284	8.667	-0.996	0.091	-3.52	4.3e-4	0.003
ENSMUSG00000106416.1	Gm5857	1.246	1.992	0.5	-0.996	0.972	-1.347	0.178	0.467
ENSMUSG00000042066.15	Tmcc2	9.402	12.858	5.947	-0.996	0.123	-3.642	2.7e-4	0.002
ENSMUSG00000030772.6	Dkk3	49.602	66.41	32.795	-0.996	0.13	-2.953	0.003	0.02
ENSMUSG00000006301.17	Tmbim1	100.395	134.073	66.717	-0.996	0.076	-3.827	1.3e-4	0.001
ENSMUSG00000044712.15	Slc38a6	43.167	57.831	28.502	-0.996	0.077	-4.535	5.8e-6	7.1e-5
ENSMUSG00000024299.16	Adamts10	3.221	4.622	1.82	-0.996	0.213	-4.727	2.3e-6	3.0e-5
ENSMUSG00000032507.15	Fbxl2	3.788	5.377	2.199	-0.995	0.236	-0.833	0.405	0.758
ENSMUSG00000032320.7	Rcn2	84.065	112.293	55.836	-0.995	0.084	-4.239	2.2e-5	2.5e-4
ENSMUSG00000038855.10	Itpkb	9.793	13.374	6.212	-0.995	0.096	-4.688	2.8e-6	3.6e-5
ENSMUSG00000024883.7	Rin1	21.702	29.233	14.17	-0.995	0.095	-4.371	1.2e-5	1.4e-4
ENSMUSG00000045216.7	Hs6st1	68.253	91.222	45.284	-0.995	0.086	-4.229	2.3e-5	2.6e-4
ENSMUSG00000024304.14	Cdh2	11.433	15.555	7.312	-0.994	0.19	-2.461	0.014	0.068
ENSMUSG00000026470.14	Stx6	32.031	42.979	21.083	-0.994	0.087	-3.248	0.001	0.008
ENSMUSG00000051391.9	Ywhag	156.416	208.554	104.278	-0.993	0.091	-3.857	1.1e-4	0.001
ENSMUSG00000026842.16	Abl1	32.187	43.178	21.195	-0.993	0.082	-4.837	1.3e-6	1.8e-5
ENSMUSG00000042124.5	Lce1f	7.948	10.911	4.985	-0.993	0.321	-1.634	0.102	0.318
ENSMUSG00000031748.16	Gnao1	7.801	10.716	4.887	-0.993	0.125	-2.451	0.014	0.069
ENSMUSG00000028654.13	Mycl	28.863	38.752	18.975	-0.993	0.122	-2.27	0.023	0.103
ENSMUSG00000041736.7	Tspo	237.552	316.528	158.576	-0.993	0.125	-2.919	0.004	0.021
ENSMUSG00000015837.15	Sqstm1	479.786	638.946	320.627	-0.993	0.076	-4.687	2.8e-6	3.6e-5
ENSMUSG00000027221.5	Chst1	1.113	1.812	0.413	-0.992	0.326	-4.532	5.8e-6	7.2e-5
ENSMUSG00000069300.3	Hist1h2bj	1.822	2.756	0.888	-0.992	0.927	-1.125	0.261	0.593
ENSMUSG00000022565.15	Plec	53.726	71.837	35.615	-0.992	0.154	-2.477	0.013	0.066
ENSMUSG00000113890.1	Gm48368	10.087	13.755	6.418	-0.992	0.137	-3.202	0.001	0.01
ENSMUSG00000030213.12	Atf7ip	12.336	16.747	7.924	-0.992	0.087	-0.595	0.552	0.872
ENSMUSG00000036894.3	Rap2b	7.057	9.723	4.392	-0.992	0.122	-4.159	3.2e-5	3.4e-4
ENSMUSG00000018566.14	Slc2a4	6.831	9.421	4.241	-0.992	0.18	-3.01	0.003	0.017
ENSMUSG00000046056.15	Sbsn	15.481	20.931	10.031	-0.991	0.196	-2.002	0.045	0.175
ENSMUSG00000022018.7	Rgcc	0.869	1.487	0.251	-0.991	0.711	-2.614	0.009	0.048
ENSMUSG00000115338.2	Pnp	41.143	55.076	27.209	-0.991	0.111	-3.677	2.4e-4	0.002
ENSMUSG00000043924.16	Ncmap	2.851	4.124	1.578	-0.991	0.332	-2.294	0.022	0.098
ENSMUSG00000037594.11	BC022687	6.998	9.641	4.354	-0.991	0.186	-2.582	0.01	0.051
ENSMUSG00000090550.2	Prlh	0.494	0.987	0	-0.991	3.68	-0.607	0.544	0.867
ENSMUSG00000020866.17	Cacna1g	1.304	2.066	0.543	-0.991	0.318	-5.796	6.8e-9	1.4e-7
ENSMUSG00000031790.8	Mmp15	28.877	38.748	19.006	-0.99	0.125	-3.13	0.002	0.012
ENSMUSG00000040287.9	Stac3	0.677	1.231	0.123	-0.99	0.824	-1.712	0.087	0.282
ENSMUSG00000030161.8	Gabarapl1	77.692	103.681	51.704	-0.99	0.089	-3.339	8.4e-4	0.006
ENSMUSG00000034457.10	Eda2r	17.48	23.582	11.378	-0.99	0.119	-3.1	0.002	0.013
ENSMUSG00000027665.13	Pik3ca	16.649	22.475	10.822	-0.99	0.088	0.419	0.675	0.925
ENSMUSG00000056124.5	B4galt6	4.119	5.809	2.429	-0.99	0.147	-4.218	2.5e-5	2.7e-4
ENSMUSG00000038205.12	Prkab2	6.006	8.319	3.693	-0.99	0.11	-4.793	1.6e-6	2.2e-5
ENSMUSG00000024533.16	Spire1	10.469	14.255	6.683	-0.989	0.097	-4.081	4.5e-5	4.6e-4
ENSMUSG00000089728.2	Clec2f	9.49	12.952	6.027	-0.989	0.28	-1.518	0.129	0.376
ENSMUSG00000051650.10	B3gnt2	12.677	17.188	8.165	-0.989	0.135	-3.041	0.002	0.015
ENSMUSG00000074247.10	Dda1	55.066	73.559	36.573	-0.989	0.089	-3.895	9.8e-5	9.3e-4
ENSMUSG00000025981.13	Coq10b	34.166	45.765	22.567	-0.989	0.121	-2.998	0.003	0.017
ENSMUSG00000031015.8	Swap70	21.281	28.629	13.933	-0.989	0.096	-4.094	4.2e-5	4.4e-4
ENSMUSG00000027660.16	Skil	26.922	36.131	17.713	-0.989	0.091	-3.919	8.9e-5	8.5e-4
ENSMUSG00000014303.13	Glis2	17.46	23.547	11.373	-0.988	0.155	-4.44	9.0e-6	1.1e-4
ENSMUSG00000056708.5	Ier5	35.523	47.564	23.481	-0.988	0.162	-2.404	0.016	0.077
ENSMUSG00000027820.12	Mme	1.749	2.656	0.843	-0.988	0.22	-3.437	5.9e-4	0.005
ENSMUSG00000018340.13	Anxa6	230.304	306.518	154.091	-0.988	0.09	-3.881	1.0e-4	9.8e-4
ENSMUSG00000018965.11	Ywhah	195.752	260.579	130.925	-0.988	0.09	-3.584	3.4e-4	0.003
ENSMUSG00000009207.15	Lnpk	12.066	16.369	7.762	-0.987	0.124	-2.887	0.004	0.023
ENSMUSG00000023021.15	Cers5	26.085	35.006	17.163	-0.987	0.102	-4.019	5.8e-5	5.8e-4
ENSMUSG00000026192.13	Atic	33.982	45.504	22.46	-0.987	0.095	-4.034	5.5e-5	5.5e-4
ENSMUSG00000022438.6	Parvb	1.974	2.953	0.995	-0.987	0.303	-3.6	3.2e-4	0.003
ENSMUSG00000067787.10	Blcap	39.427	52.735	26.118	-0.987	0.095	-4.185	2.8e-5	3.1e-4
ENSMUSG00000051335.6	Gfod1	1.614	2.475	0.754	-0.986	0.171	-7.739	1.0e-14	4.1e-13
ENSMUSG00000032562.13	Gnai2	226.793	301.729	151.857	-0.986	0.087	-4.069	4.7e-5	4.8e-4
ENSMUSG00000032192.9	Gnb5	11.108	15.091	7.125	-0.986	0.146	-1.773	0.076	0.257
ENSMUSG00000029119.9	Man2b2	23.712	31.837	15.586	-0.985	0.118	-3.269	0.001	0.008
ENSMUSG00000022790.14	Igsf11	5.028	7.01	3.046	-0.985	0.18	-2.101	0.036	0.145
ENSMUSG00000045671.17	Spred2	16.637	22.433	10.84	-0.985	0.107	-3.422	6.2e-4	0.005
ENSMUSG00000069188.5	Gm13192	0.489	0.979	0	-0.984	4.044	-0.372	0.71	0.925
ENSMUSG00000082277.2	Gm15807	1.917	2.875	0.96	-0.984	0.428	-2.157	0.031	0.13
ENSMUSG00000106645.1	Gm42643	0.489	0.977	0	-0.984	4.001	-0.512	0.609	0.888
ENSMUSG00000028691.12	Prdx1	558.197	741.769	374.625	-0.984	0.103	-3.542	4.0e-4	0.003
ENSMUSG00000041958.10	Pigs	31.053	41.574	20.533	-0.983	0.091	-4.061	4.9e-5	5.0e-4
ENSMUSG00000034729.16	Mrps10	31.144	41.694	20.594	-0.983	0.116	-2.952	0.003	0.02
ENSMUSG00000029409.7	U90926	0.684	1.237	0.132	-0.983	1.485	-1.678	0.093	0.298
ENSMUSG00000028517.8	Plpp3	10.245	13.934	6.557	-0.983	0.153	-2.688	0.007	0.039
ENSMUSG00000034271.16	Jdp2	18.44	24.816	12.063	-0.983	0.134	-2.893	0.004	0.023
ENSMUSG00000109864.1	Eid3	1.239	1.974	0.505	-0.983	0.46	-2.849	0.004	0.026
ENSMUSG00000006373.10	Pgrmc1	118.402	157.553	79.25	-0.982	0.097	-3.569	3.6e-4	0.003
ENSMUSG00000078875.10	Gm14419	1.729	2.624	0.835	-0.982	0.786	-1.336	0.182	0.473
ENSMUSG00000022822.15	Abcc5	16.036	21.618	10.454	-0.982	0.112	-1.011	0.312	0.657
ENSMUSG00000001435.15	Col18a1	139.962	186.143	93.781	-0.981	0.109	-2.915	0.004	0.022
ENSMUSG00000078300.3	Gm2606	1.391	2.175	0.608	-0.981	0.574	-2.157	0.031	0.13
ENSMUSG00000018398.18	Sept8	24.081	32.296	15.865	-0.981	0.089	-3.993	6.5e-5	6.4e-4
ENSMUSG00000032902.1	Slc16a1	3.535	5.021	2.05	-0.981	0.141	-4.553	5.3e-6	6.6e-5
ENSMUSG00000019461.12	Plscr3	64.793	86.337	43.25	-0.981	0.108	-2.747	0.006	0.034
ENSMUSG00000027397.14	Slc20a1	27.339	36.616	18.061	-0.981	0.106	-3.857	1.1e-4	0.001
ENSMUSG00000026031.15	Cflar	34.473	46.086	22.861	-0.981	0.085	-4.807	1.5e-6	2.1e-5
ENSMUSG00000020256.14	Aldh1l2	5.622	7.789	3.454	-0.981	0.109	-4.286	1.8e-5	2.0e-4
ENSMUSG00000026104.14	Stat1	17.97	24.178	11.762	-0.98	0.152	-2.71	0.007	0.037
ENSMUSG00000041390.18	Mdfic	13.635	18.424	8.846	-0.98	0.108	-3.427	6.1e-4	0.005
ENSMUSG00000035891.16	Cerk	4.338	6.084	2.592	-0.98	0.172	-3.38	7.3e-4	0.005
ENSMUSG00000017747.13	Ghdc	10.029	13.636	6.421	-0.98	0.123	-3.86	1.1e-4	0.001
ENSMUSG00000001098.15	Kctd10	63.274	84.292	42.256	-0.979	0.093	-3.666	2.5e-4	0.002
ENSMUSG00000018830.9	Myh11	39.321	52.504	26.137	-0.979	0.153	-2.119	0.034	0.14
ENSMUSG00000002844.8	Adprh	41.032	54.77	27.295	-0.979	0.091	-3.839	1.2e-4	0.001
ENSMUSG00000037112.16	Sik2	13.748	18.568	8.928	-0.979	0.102	-0.847	0.397	0.75
ENSMUSG00000025586.17	Cpeb1	17.596	23.668	11.523	-0.978	0.128	-3.989	6.6e-5	6.5e-4
ENSMUSG00000020458.16	Rtn4	422.638	560.935	284.342	-0.978	0.155	-2.218	0.027	0.115
ENSMUSG00000071037.5	Camkmt	2.875	4.14	1.61	-0.978	0.377	-1.821	0.069	0.238
ENSMUSG00000032193.9	Ldlr	22.12	29.666	14.573	-0.978	0.086	-4.338	1.4e-5	1.6e-4
ENSMUSG00000030471.17	Zdhhc13	22.013	29.523	14.504	-0.977	0.119	-2.529	0.011	0.058
ENSMUSG00000028035.13	Dnajb4	26.375	35.307	17.442	-0.977	0.097	-3.785	1.5e-4	0.001
ENSMUSG00000020085.15	Aifm2	13.18	17.807	8.553	-0.977	0.132	-3.93	8.5e-5	8.2e-4
ENSMUSG00000039349.5	C130074G19Rik	8.665	11.818	5.511	-0.977	0.132	-3.434	5.9e-4	0.005
ENSMUSG00000019997.11	Ctgf	1432.43	1900.09	964.777	-0.977	0.111	-3.055	0.002	0.015
ENSMUSG00000040842.17	Szrd1	45.514	60.685	30.343	-0.977	0.087	-1.942	0.052	0.194
ENSMUSG00000020260.9	Pofut2	41.098	54.827	27.369	-0.977	0.094	-4.197	2.7e-5	2.9e-4
ENSMUSG00000046798.14	Cldn12	22.761	30.506	15.015	-0.976	0.097	-3.517	4.4e-4	0.004
ENSMUSG00000060147.15	Serpinb6a	185.556	246.369	124.743	-0.976	0.079	-3.896	9.8e-5	9.3e-4
ENSMUSG00000002365.9	Snx9	34.219	45.698	22.74	-0.976	0.1	-3.548	3.9e-4	0.003
ENSMUSG00000114481.1	Gm46415	0.483	0.967	0	-0.976	2.91	-1.08	0.28	0.619
ENSMUSG00000033722.9	BC034090	7.836	10.716	4.957	-0.976	0.134	-6.151	7.7e-10	1.7e-8
ENSMUSG00000041124.11	Msantd4	21.784	29.208	14.361	-0.976	0.095	-3.924	8.7e-5	8.4e-4
ENSMUSG00000021203.15	Otub2	3.493	4.957	2.029	-0.976	0.214	-2.008	0.045	0.173
ENSMUSG00000017756.9	Slc12a7	12.917	17.449	8.386	-0.975	0.101	-3.277	0.001	0.008
ENSMUSG00000024816.12	Frmd8	25.884	34.636	17.131	-0.975	0.102	-4.185	2.8e-5	3.1e-4
ENSMUSG00000025287.15	Acot9	56.443	75.144	37.743	-0.975	0.109	-3.293	9.9e-4	0.007
ENSMUSG00000036902.11	Neto2	1.813	2.729	0.898	-0.975	0.221	-3.63	2.8e-4	0.002
ENSMUSG00000029430.13	Ran	109.892	145.988	73.797	-0.975	0.083	-3.011	0.003	0.017
ENSMUSG00000062753.13	AI413582	21.116	28.314	13.919	-0.974	0.177	-2.073	0.038	0.153
ENSMUSG00000035198.9	Tubg1	19.947	26.763	13.13	-0.974	0.106	-3.52	4.3e-4	0.003
ENSMUSG00000018752.19	Tnfsfm13	2.298	3.371	1.225	-0.974	0.281	-2.452	0.014	0.069
ENSMUSG00000078517.12	Emc1	9.939	13.497	6.38	-0.974	0.095	-4.282	1.9e-5	2.1e-4
ENSMUSG00000010358.13	Ifi35	29.632	39.597	19.667	-0.974	0.131	-2.875	0.004	0.024
ENSMUSG00000047557.2	Lxn	37.41	49.892	24.927	-0.973	0.111	-3.145	0.002	0.011
ENSMUSG00000052534.15	Pbx1	17.41	23.393	11.428	-0.973	0.111	-2.626	0.009	0.046
ENSMUSG00000037692.14	Ahdc1	12.538	16.937	8.14	-0.973	0.136	-1.572	0.116	0.349
ENSMUSG00000090272.8	Mndal	1.614	2.463	0.765	-0.973	0.368	-3.241	0.001	0.008
ENSMUSG00000073716.6	Gm13241	1.629	2.483	0.775	-0.972	0.535	-1.87	0.061	0.22
ENSMUSG00000036916.13	Zfp280c	3.471	4.922	2.019	-0.972	0.169	-3.312	9.3e-4	0.007
ENSMUSG00000044548.11	Dact1	1.776	2.677	0.875	-0.972	0.26	-3.947	7.9e-5	7.7e-4
ENSMUSG00000021390.6	Ogn	5.222	7.241	3.202	-0.972	0.215	-2.496	0.013	0.063
ENSMUSG00000078162.6	Gm2574	2.511	3.65	1.371	-0.971	0.687	-1.224	0.221	0.536
ENSMUSG00000024070.15	Prkd3	6.86	9.411	4.309	-0.971	0.128	-3.535	4.1e-4	0.003
ENSMUSG00000026826.13	Nr4a2	8.395	11.443	5.348	-0.971	0.126	-8.462	2.6e-17	1.4e-15
ENSMUSG00000051934.5	Spats2	14.377	19.364	9.389	-0.971	0.107	-2.767	0.006	0.032
ENSMUSG00000030095.10	Tmem43	51.62	68.686	34.553	-0.971	0.094	-4.047	5.2e-5	5.3e-4
ENSMUSG00000031255.14	Sytl4	2.442	3.559	1.326	-0.971	0.205	-2.124	0.034	0.139
ENSMUSG00000021311.9	Mtr	3.951	5.555	2.346	-0.97	0.145	-2.534	0.011	0.057
ENSMUSG00000074604.9	Mgst2	1.682	2.551	0.813	-0.97	0.515	-0.778	0.437	0.787
ENSMUSG00000001655.6	Hoxc13	0.67	1.211	0.129	-0.97	0.551	-4.655	3.2e-6	4.2e-5
ENSMUSG00000025150.10	Cbr2	17.15	23.028	11.272	-0.969	0.222	-1.907	0.057	0.206
ENSMUSG00000033306.14	Lpp	25.327	33.851	16.804	-0.969	0.095	-3.821	1.3e-4	0.001
ENSMUSG00000021360.16	Gcnt2	9.449	12.832	6.067	-0.969	0.13	-2.556	0.011	0.055
ENSMUSG00000029597.14	Sds	0.866	1.47	0.262	-0.968	0.879	-1.447	0.148	0.413
ENSMUSG00000021930.14	Spryd7	8.687	11.821	5.553	-0.968	0.149	-2.018	0.044	0.17
ENSMUSG00000089872.10	Rps6kc1	8.596	11.698	5.493	-0.968	0.116	-1.684	0.092	0.295
ENSMUSG00000030603.16	Psmc4	96.66	128.231	65.089	-0.967	0.091	-3.572	3.5e-4	0.003
ENSMUSG00000053070.5	9230110C19Rik	3.593	5.078	2.108	-0.967	0.278	-2.132	0.033	0.137
ENSMUSG00000026399.12	Cd55	13.79	18.57	9.01	-0.967	0.128	-2.385	0.017	0.081
ENSMUSG00000022305.13	Lrp12	8.523	11.601	5.445	-0.967	0.136	-2.536	0.011	0.057
ENSMUSG00000026028.12	Trak2	14.392	19.367	9.418	-0.967	0.083	-3.136	0.002	0.012
ENSMUSG00000036427.5	Gpi1	174.507	231.202	117.812	-0.967	0.07	-4.116	3.9e-5	4.0e-4
ENSMUSG00000116015.1	AC147512.3	0.477	0.953	0	-0.966	3.16	-0.886	0.376	0.73
ENSMUSG00000030615.12	Tmem126a	39.659	52.773	26.546	-0.965	0.148	-2.215	0.027	0.116
ENSMUSG00000034659.14	Tmem109	21.419	28.648	14.189	-0.965	0.1	-3.232	0.001	0.009
ENSMUSG00000033460.14	Armcx1	6.176	8.489	3.863	-0.965	0.153	-1.952	0.051	0.191
ENSMUSG00000057363.12	Uxs1	24.059	32.136	15.981	-0.964	0.137	-1.634	0.102	0.318
ENSMUSG00000031555.15	Adam9	64.543	85.667	43.419	-0.964	0.075	-4.358	1.3e-5	1.5e-4
ENSMUSG00000029510.15	Gpc2	7.327	10.01	4.643	-0.964	0.18	-2.598	0.009	0.049
ENSMUSG00000047735.14	Samd9l	10.804	14.608	7.001	-0.964	0.108	-4.479	7.5e-6	9.0e-5
ENSMUSG00000073016.3	Uprt	8.274	11.261	5.286	-0.964	0.175	-2.551	0.011	0.055
ENSMUSG00000018143.10	Mafk	31.837	42.412	21.262	-0.963	0.1	-3.47	5.2e-4	0.004
ENSMUSG00000048644.8	Ctxn1	38.059	50.635	25.482	-0.963	0.142	-2.523	0.012	0.059
ENSMUSG00000032262.13	Elovl4	1.184	1.887	0.481	-0.963	0.361	-3.077	0.002	0.014
ENSMUSG00000051910.13	Sox6	1.551	2.372	0.73	-0.963	0.266	0.875	0.381	0.735
ENSMUSG00000042251.12	Pm20d1	0.973	1.608	0.338	-0.963	0.359	-2.392	0.017	0.079
ENSMUSG00000027861.13	Casq2	2.624	3.79	1.458	-0.963	0.228	-1.361	0.174	0.46
ENSMUSG00000025366.8	Esyt1	53.657	71.241	36.074	-0.962	0.075	-4.467	7.9e-6	9.5e-5
ENSMUSG00000070526.2	Peg12	0.865	1.465	0.265	-0.962	0.449	-4.085	4.4e-5	4.6e-4
ENSMUSG00000001911.16	Nfix	22.825	30.487	15.162	-0.962	0.128	-2.22	0.026	0.115
ENSMUSG00000005078.16	Jkamp	20.766	27.765	13.767	-0.962	0.128	-2.894	0.004	0.023
ENSMUSG00000036246.14	Gmip	8.509	11.565	5.452	-0.962	0.138	-1.984	0.047	0.18
ENSMUSG00000030347.6	D6Wsu163e	5.747	7.916	3.579	-0.961	0.161	-1.918	0.055	0.202
ENSMUSG00000064215.13	Ifi27	127.564	168.872	86.255	-0.961	0.104	-2.948	0.003	0.02
ENSMUSG00000079480.3	Pin4	71.127	94.302	47.952	-0.961	0.171	-2.029	0.042	0.167
ENSMUSG00000020491.15	2810021J22Rik	2.332	3.402	1.261	-0.961	0.238	0.198	0.843	0.945
ENSMUSG00000026414.13	Tnnt2	6.928	9.475	4.381	-0.961	0.233	-0.437	0.662	0.92
ENSMUSG00000009246.14	Trpm5	2.349	3.424	1.273	-0.961	0.456	-1.588	0.112	0.341
ENSMUSG00000048911.15	Rnf24	4.519	6.291	2.747	-0.96	0.16	-3.796	1.5e-4	0.001
ENSMUSG00000073557.11	Ppp1r12b	32.422	43.143	21.7	-0.959	0.094	-3.62	3.0e-4	0.002
ENSMUSG00000020010.7	Vnn3	1.205	1.913	0.498	-0.959	0.375	-3.42	6.3e-4	0.005
ENSMUSG00000025940.6	Tmem70	47.244	62.711	31.778	-0.959	0.101	-2.099	0.036	0.146
ENSMUSG00000097186.1	Gm26595	0.471	0.943	0	-0.958	1.913	-2.28	0.023	0.101
ENSMUSG00000078677.1	Gm10974	0.49	0.968	0.013	-0.958	4.047	-0.362	0.717	0.925
ENSMUSG00000032531.15	Amotl2	88.926	117.731	60.121	-0.958	0.124	-2.576	0.01	0.052
ENSMUSG00000006219.12	Fblim1	85.636	113.384	57.887	-0.958	0.109	-2.623	0.009	0.046
ENSMUSG00000002058.13	Unc119	19.134	25.581	12.686	-0.958	0.151	-2.434	0.015	0.072
ENSMUSG00000030847.8	Bag3	42.15	55.966	28.333	-0.958	0.112	-2.98	0.003	0.018
ENSMUSG00000021367.8	Edn1	101.801	134.71	68.892	-0.957	0.113	-2.691	0.007	0.039
ENSMUSG00000026764.15	Kif5c	2.377	3.457	1.296	-0.957	0.199	-3.646	2.7e-4	0.002
ENSMUSG00000024587.9	Nars	207.614	274.379	140.849	-0.957	0.085	-3.521	4.3e-4	0.003
ENSMUSG00000054342.8	Kcnn4	6.138	8.422	3.854	-0.957	0.168	-2.747	0.006	0.034
ENSMUSG00000031112.10	Stk26	3.446	4.869	2.024	-0.957	0.173	-3.69	2.2e-4	0.002
ENSMUSG00000020357.3	Flt4	10.918	14.731	7.104	-0.957	0.096	-4.223	2.4e-5	2.6e-4
ENSMUSG00000032328.12	Tmem30a	41.214	54.713	27.714	-0.956	0.081	-4.084	4.4e-5	4.6e-4
ENSMUSG00000036155.13	Mgat5	3.972	5.561	2.382	-0.956	0.14	-4.301	1.7e-5	1.9e-4
ENSMUSG00000070605.4	Zfp992	4.327	6.03	2.624	-0.956	0.19	-2.988	0.003	0.018
ENSMUSG00000029468.17	P2rx7	8.169	11.1	5.238	-0.956	0.126	-3.239	0.001	0.009
ENSMUSG00000063412.4	Gm10131	0.791	1.363	0.218	-0.956	3.051	-0.659	0.51	0.845
ENSMUSG00000028284.13	Map3k7	18.161	24.285	12.037	-0.956	0.1	-1.384	0.166	0.446
ENSMUSG00000078153.3	Psme2b	11.352	15.3	7.404	-0.956	0.199	-2.002	0.045	0.175
ENSMUSG00000010392.8	Gosr1	16.875	22.588	11.163	-0.956	0.102	1.589	0.112	0.34
ENSMUSG00000043165.7	Lor	1.862	2.777	0.947	-0.956	0.323	-2.827	0.005	0.028
ENSMUSG00000037035.5	Inhbb	10.789	14.557	7.022	-0.956	0.179	-2.348	0.019	0.087
ENSMUSG00000049038.3	Mterf2	4.953	6.855	3.051	-0.955	0.303	-0.468	0.64	0.906
ENSMUSG00000047649.9	Cd3eap	14.877	19.95	9.804	-0.955	0.13	-3.226	0.001	0.009
ENSMUSG00000026313.16	Hdac4	8.224	11.17	5.279	-0.955	0.118	-1.229	0.219	0.533
ENSMUSG00000002728.14	Naa20	41.038	54.459	27.616	-0.955	0.119	-2.698	0.007	0.038
ENSMUSG00000041135.15	Ripk2	6.65	9.091	4.208	-0.954	0.14	-3.272	0.001	0.008
ENSMUSG00000005681.12	Apoa2	1.102	1.772	0.431	-0.954	1.261	-1.109	0.268	0.603
ENSMUSG00000030616.15	Sytl2	1.889	2.811	0.968	-0.953	0.258	-4.031	5.5e-5	5.6e-4
ENSMUSG00000030245.10	Golt1b	20.972	27.978	13.966	-0.953	0.1	-0.771	0.441	0.79
ENSMUSG00000069874.7	Irgm2	5.797	7.963	3.631	-0.953	0.139	-3.422	6.2e-4	0.005
ENSMUSG00000105310.1	Gm42451	0.468	0.936	0	-0.953	4.035	-0.397	0.691	0.925
ENSMUSG00000028845.15	Tekt2	1.935	2.87	1	-0.953	0.354	-2.347	0.019	0.087
ENSMUSG00000046873.18	Mbtps2	10.332	13.943	6.721	-0.953	0.112	0.626	0.531	0.861
ENSMUSG00000042121.16	Ssh1	9.554	12.916	6.192	-0.952	0.109	-2.62	0.009	0.047
ENSMUSG00000031328.15	Flna	451.58	595.695	307.465	-0.952	0.089	-3.886	1.0e-4	9.7e-4
ENSMUSG00000028445.7	Enho	10.2	13.766	6.634	-0.952	0.186	-2.07	0.038	0.154
ENSMUSG00000037852.8	Cpe	131.62	173.845	89.396	-0.952	0.102	-3.149	0.002	0.011
ENSMUSG00000021013.16	Ttc8	7.423	10.104	4.742	-0.952	0.158	-1.161	0.246	0.572
ENSMUSG00000042210.17	Abhd14a	13.967	18.73	9.204	-0.951	0.148	-2.315	0.021	0.094
ENSMUSG00000032177.17	Pde4a	2.215	3.238	1.192	-0.951	0.218	-3.814	1.4e-4	0.001
ENSMUSG00000091898.8	Tnnc1	4.238	5.904	2.571	-0.951	0.346	-1.543	0.123	0.363
ENSMUSG00000048779.5	P2ry6	1.687	2.542	0.832	-0.951	0.346	-2.739	0.006	0.035
ENSMUSG00000115853.1	LO018689.1	2.673	3.842	1.505	-0.951	0.278	-2.496	0.013	0.063
ENSMUSG00000069744.7	Psmb3	185.87	245.307	126.432	-0.951	0.1	-3.073	0.002	0.014
ENSMUSG00000028167.15	Bdh2	1.205	1.906	0.504	-0.951	0.497	-2.336	0.019	0.09
ENSMUSG00000029552.19	Tes	102.684	135.653	69.714	-0.95	0.104	-3.004	0.003	0.017
ENSMUSG00000055137.7	Sugct	1.025	1.668	0.381	-0.95	0.601	-2.145	0.032	0.133
ENSMUSG00000056153.14	Socs6	23.292	31.014	15.57	-0.95	0.094	-0.724	0.469	0.81
ENSMUSG00000030695.16	Aldoa	817.289	1077.39	557.19	-0.95	0.087	-3.281	0.001	0.007
ENSMUSG00000004936.8	Map2k1	64.052	84.729	43.376	-0.95	0.089	-3.899	9.6e-5	9.2e-4
ENSMUSG00000021458.17	2010111I01Rik	47.445	62.839	32.051	-0.95	0.119	-2.242	0.025	0.109
ENSMUSG00000054256.11	Msi1	4.294	5.976	2.612	-0.95	0.209	-2.3	0.021	0.097
ENSMUSG00000032968.4	Inha	2.063	3.036	1.09	-0.949	0.323	-2.505	0.012	0.061
ENSMUSG00000001761.7	Smo	21.17	28.21	14.129	-0.949	0.131	-2.758	0.006	0.033
ENSMUSG00000027519.10	Rab22a	21.044	28.044	14.044	-0.949	0.086	-1.603	0.109	0.333
ENSMUSG00000030042.15	Pole4	35.677	47.312	24.042	-0.948	0.138	-2.639	0.008	0.045
ENSMUSG00000051236.13	Msrb3	43.877	58.109	29.645	-0.948	0.103	-3.414	6.4e-4	0.005
ENSMUSG00000029392.12	Rilpl1	9.717	13.116	6.319	-0.948	0.158	-2.529	0.011	0.058
ENSMUSG00000050029.7	Rap2c	12.865	17.262	8.469	-0.948	0.099	-3.789	1.5e-4	0.001
ENSMUSG00000026426.10	Arl8a	71.94	95.069	48.812	-0.948	0.096	-3.589	3.3e-4	0.003
ENSMUSG00000033313.11	Fbxl8	3.902	5.455	2.348	-0.947	0.195	-2.883	0.004	0.024
ENSMUSG00000042942.16	Greb1l	0.919	1.527	0.311	-0.947	0.308	-1.61	0.107	0.33
ENSMUSG00000031352.10	Hccs	8.263	11.199	5.328	-0.947	0.146	-2.909	0.004	0.022
ENSMUSG00000020309.6	Chac2	4.315	5.999	2.631	-0.947	0.265	-1.867	0.062	0.221
ENSMUSG00000052293.14	Taf9	7.979	10.825	5.134	-0.947	0.269	-1.517	0.129	0.376
ENSMUSG00000062078.14	Qk	26.715	35.496	17.934	-0.947	0.095	-3.76	1.7e-4	0.002
ENSMUSG00000034118.15	Tpst1	6.735	9.186	4.284	-0.947	0.167	-3.28	0.001	0.008
ENSMUSG00000024019.17	Cmtr1	25.124	33.401	16.847	-0.947	0.096	-2.376	0.017	0.082
ENSMUSG00000037408.10	Cnnm4	11.19	15.052	7.328	-0.947	0.132	-3.024	0.002	0.016
ENSMUSG00000035184.15	Fam124a	1.23	1.937	0.524	-0.947	0.35	-2.332	0.02	0.091
ENSMUSG00000066643.12	Wdr35	6.077	8.319	3.836	-0.946	0.134	-2.473	0.013	0.066
ENSMUSG00000078655.1	Gm10972	0.464	0.927	0	-0.946	4.035	-0.397	0.691	0.925
ENSMUSG00000062014.13	Gmfb	37.594	49.813	25.376	-0.946	0.098	-2.885	0.004	0.024
ENSMUSG00000086922.2	Gm13835	60.277	79.671	40.884	-0.946	0.191	-1.754	0.079	0.265
ENSMUSG00000020935.8	Dcakd	32.968	43.717	22.219	-0.945	0.111	-2.398	0.016	0.078
ENSMUSG00000027490.17	E2f1	4.255	5.918	2.592	-0.945	0.167	-3.272	0.001	0.008
[truncated: 21,462 more rows]

## Sheet: Figure 3c
Figure 3
Figure 3 C
	log2FC	lfcSE
Spinkl	1.998	0.254
Sva	2.045	0.25
Svs3b	2.07	0.26
Svs1	2.112	0.293
Uox	2.145	0.411
Defb42	2.185	0.159
Dnase2b	2.262	0.284
Doxl2	2.27	0.227
Gsdma	2.354	0.215
Rps27	2.704	0.291
Rarres2	-3.572	0.147
Prr9	-3.413	0.194
Col1a1	-3.379	0.149
Col1a2	-3.34	0.129
Fgf2	-3.331	0.11
S100a4	-3.229	0.209
Col5a2	-3.135	0.124
Adgra2	-3.111	0.122
Bgn	-3.091	0.083
Mmp2	-3.087	0.105

## Sheet: Figure 3d
Figure 3
Figure 3 D
Pathway_ID	Pathway	Database	NumDEInCat	NumDEAnot	DEPercent	NumInCat	NumGenesAnot	AnotPercent	p-value
mmu01100	Metabolic pathways	KEGG	394	2728	14.443	1257	10805	11.634	2.4e-7
mmu05200	Pathways in cancer	KEGG	137	2728	5.022	388	10805	3.591	2.0e-6
mmu04151	PI3K-Akt signaling pathway	KEGG	110	2728	4.032	328	10805	3.036	3.1e-4
mmu04144	Endocytosis	KEGG	94	2728	3.446	275	10805	2.545	4.8e-4
mmu05166	HTLV-I infection	KEGG	91	2728	3.336	271	10805	2.508	0.001
mmu04510	Focal adhesion	KEGG	87	2728	3.189	197	10805	1.823	2.2e-9
mmu05205	Proteoglycans in cancer	KEGG	86	2728	3.152	200	10805	1.851	1.0e-8
mmu04060	Cytokine-cytokine receptor interaction	KEGG	73	2728	2.676	243	10805	2.249	0.035
mmu04014	Ras signaling pathway	KEGG	72	2728	2.639	219	10805	2.027	0.006
mmu04015	Rap1 signaling pathway	KEGG	72	2728	2.639	205	10805	1.897	8.0e-4
