# Supplementary material for: Testosterone-induced metabolic changes in seminal vesicle epithelium modify seminal plasma components with potential to improve sperm motility
Source: eLife. 2025 Dec 18;13:RP95541. doi: 10.7554/eLife.95541 (PMC12714332; doi:10.7554/eLife.95541)
Supplement: Figure 4—source data 1. [file elife-95541-fig4-data1.xlsx]

## Sheet: Figure 4
Figure 4
Figure 4 A
Time (minutes)	Ctrl 1	Ctrl 2	Ctrl 3	Testo 1	Testo 2	Testo 3
1.54	-1.48282	9.65812	8.81891	1.87241	17.3986	2.3987
8.04	-0.371261	7.84516	6.79879	-5.22381	16.2166	17.3257
14.53	3.95792	12.0298	12.2467	1.92765	16.3556	20.7693
21.03	5.16677	12.4699	11.1807	1.0774	15.7349	19.253
27.52	3.46931	10.8267	9.14033	0.711719	15.3158	17.8517
34.1	5.3835	13.1053	13.7362	19.6889	18.6478	19.2391
40.6	12.1255	21.4838	17.2327	25.5514	28.1774	26.5584
47.11	11.6315	21.7855	16.4443	25.8471	28.8228	25.3253
53.61	7.12483	20.7514	17.9699	24.3554	20.5794	28.6104
60.12	14.8811	29.106	26.4668	28.1731	28.8129	22.8728
66.7	18.3681	30.7204	28.338	30.6773	33.2313	22.7737
73.19	-2.25276	0.986188	-6.66275	-1.26422	-0.99189	40.2204
79.69	4.80575	11.53	1.95326	6.61796	2.24926	18.748
86.19	6.09497	15.2129	6.0096	10.1833	6.14883	12.3459
92.68	9.37	17.5284	9.65767	11.6661	10.053	9.87138
99.26	7.77365	17.4887	11.7352	10.1209	11.8326	8.18947
						(mpH/min)
Figure 4 B,C
Glucose induced ECAR	Ctrl	Testo		Oligomycin-sensitive ECAR	Ctrl	Testo
1	11.6315	25.8471		1	18.3681	30.6773
2	21.7855	28.8228		2	30.7204	33.2313
3	16.4443	25.3253		3	28.338	22.7737
		(mpH/min)				(mpH/min)
Figure 4 D,E
Pyruvate consumption	Ctrl	Testo		Lactate	Ctrl	Testo
1	305.235	264.095		1	79.9912	94.4879
2	222.615	190.315		2	61.9512	138.67
3	360.315	282.455		3	63.3088	105.726
4	320.195	287.215		4	213.032	182.355
5	413.015	259.335		5	78.9161	93.3062
6	353.855	280.755		6	45.6301	54.2256
		(µM)				(µM)
Figure 4 F
Time (minutes)	Ctrl 1	Ctrl 2	Ctrl 3	Testo 1	Testo 2	Testo 3
1.53	236.697	227.08	197.322	147.454	144.269	148.441
8.04	239.953	235.326	206.441	151.77	147.965	151.316
14.55	241.217	234.392	208.125	155.11	149.194	155.011
21.05	243.404	236.391	208.403	158.742	150.744	157.887
27.55	244.39	233.671	206.4	160.759	147.272	159.58
34.14	81.9416	79.6848	63.6724	110.531	85.7627	93.0088
40.64	71.7481	69.881	60.9883	67.4668	63.4633	63.2488
47.14	70.5095	70.3574	63.5622	64.4467	61.8344	61.9165
53.72	594.439	584.094	525.25	317.965	304.486	308.768
60.23	523.491	530.679	462.494	326.607	310.516	316.922
66.74	499.563	488.524	438.288	310.759	299.251	301.598
73.32	53.1144	49.2411	43.5864	42.9947	43.564	39.3922
79.83	49.5435	47.0444	43.9359	41.9426	40.4609	39.3436
86.33	47.0349	44.536	42.2043	42.2865	39.7747	39.8195
						(pmol/min)
Figure 4 G-J
Basal OCR	Ctrl	Testo		FCCP uncoupled respiration	Ctrl	Testo
1	49.34	29.705		1	136.85	71.165
2	47.2825	26.875		2	134.89	67.685
3	41.05	30.06		3	120.763	69.395
		(pmol/min)				(pmol/min)
Spare respiratory	Ctrl	Testo		Oligomycin-sensitive respiration	Ctrl	Testo
1	87.5125	41.4625		1	43.47	24.0775
2	87.605	40.81		2	40.9475	21.36
3	79.7125	39.335		3	36.3525	24.415
		(pmol/min)				(pmol/min)
