# Supplementary material for: Testosterone-induced metabolic changes in seminal vesicle epithelium modify seminal plasma components with potential to improve sperm motility
Source: eLife. 2025 Dec 18;13:RP95541. doi: 10.7554/eLife.95541 (PMC12714332; doi:10.7554/eLife.95541)
Supplement: Figure 5—figure supplement 1—source data 1. [file elife-95541-fig5-figsupp1-data1.xlsx]

## Sheet: Supplementary Figure 3
Figure S3
Figure S3 B	acly				nd1				nd6				acc
	Ctrl	Flu			Ctrl	Flu			Ctrl	Flu			Ctrl	Flu
1	0.972805	0.933414		1	1.12312	0.859737		1	1.03439	1.23438		1	1.03297	0.274145
2	1.02462	0.871517		2	0.99151	1.22851		2	0.919357	1.216		2	1.14442	0.367079
3	1.00325	0.809212		3	0.898003	0.960588		3	1.05156	1.10432		3	0.845913	0.60929
