# Supplementary material for: Testosterone-induced metabolic changes in seminal vesicle epithelium modify seminal plasma components with potential to improve sperm motility
Source: eLife. 2025 Dec 18;13:RP95541. doi: 10.7554/eLife.95541 (PMC12714332; doi:10.7554/eLife.95541)
Supplement: Figure 5—source data 1. [file elife-95541-fig5-data1.xlsx]

## Sheet: Figure 5
Figure 5
ΔΔCt	Acc	Acly	Aco2	Cs	Fasn	Fh	Glut1	Glut2	Glut3	Glut4	Hk1	Hk2	Hmgcr	Idh2	Mdh2	Nd1	Nd6	Ogdh	Pdha	Sdhb	Suclg2
Ctrl 1	-0.178326	-0.476414	-0.179342	-1.84685	-0.289117	0.161873	0.246607	Undetermined	-0.312457	-0.863429	5.02814	-1.03302	-0.376253	-0.176228	0.105406	0.063982	-0.0500104	-0.119941	0.375565	0.218758	-0.122245
Ctrl 2	-0.75355	-0.0375751	0.0851901	-2.52349	0.499297	0.00929546	-0.471894	Undetermined	-0.00976117	0.0826728	6.36461	-0.738303	0.00908279	-0.24748	-0.0890767	0.0157309	-0.099817	0.0463575	-0.205261	0.0723432	0.0339044
Ctrl 3	0.931875	0.513989	0.0941518	-2.2726	-0.210181	-0.171168	-0.579182	Undetermined	0.322219	0.780757	5.20273	0.486438	0.36717	0.423708	-0.0163294	-0.0797129	0.149827	0.0735839	-0.170303	-0.0181214	0.0883401
Testo 1	-1.84517	-0.816495	-0.124983	-2.06325	-0.467547	0.0466557	-0.226183	Undetermined	-0.536123	3.11725	5.59184	-0.0869967	-0.357273	-0.325082	0.0468582	0.85101	1.02874	-0.199449	-0.282721	-0.0948626	-0.0142419
Testo 2	-1.18884	-0.809932	-0.362328	-2.52567	-0.531796	-0.0408726	0.619049	Undetermined	-0.825107	0.84694	5.1596	-0.296452	-0.387777	-0.315307	-0.0701052	0.467797	1.12916	-0.151409	0.45162	-0.170531	-0.232182
Testo 3	-2.52151	-1.18684	-0.260074	-1.56491	-1.65344	0.124371	-0.639242	Undetermined	-1.93423	0.0697753	5.13193	0.341075	-0.761717	-0.33083	0.00352701	0.39602	0.855502	-0.4297	-0.604277	-0.00758616	-0.000862757
2^-ΔΔCt	Acc	Acly	Aco2	Cs	Fasn	Fh	Glut1	Glut2	Glut3	Glut4	Hk1	Hk2	Hmgcr	Idh2	Mdh2	Nd1	Nd6	Ogdh	Pdha	Sdhb	Suclg2
Ctrl 1	1.13157	1.39128	1.13237	3.59713	1.22189	0.893864	0.842877		1.24182	1.81936	0.0306464	2.0463	1.29797	1.12993	0.929543	0.95662	1.03527	1.08669	0.770804	0.859305	1.08843
Ctrl 2	1.68594	1.02639	0.94266	5.74973	0.707451	0.993578	1.38693		1.00679	0.944307	0.0121356	1.66821	0.993724	1.18713	1.06369	0.989155	1.07164	0.968378	1.1529	0.951092	0.976773
Ctrl 3	0.524177	0.700283	0.936823	4.83194	1.15683	1.12597	1.494		0.799839	0.582061	0.0271532	0.713785	0.775302	0.745506	1.01138	1.05681	0.901358	0.950274	1.1253	1.01264	0.940604
Testo 1	3.59295	1.76112	1.0905	4.17928	1.38276	0.968178	1.16974		1.45007	0.115243	0.0207343	1.06216	1.281	1.25274	0.968042	0.554396	0.490138	1.14826	1.21649	1.06796	1.00992
Testo 2	2.2797	1.75313	1.2855	5.7584	1.44573	1.02874	0.6511		1.77167	0.555963	0.0279773	1.22812	1.30838	1.24428	1.04979	0.723068	0.457181	1.11065	0.731221	1.12547	1.17461
Testo 3	5.74182	2.27654	1.19754	2.95859	3.14584	0.917404	1.55751		3.82175	0.952786	0.028519	0.789453	1.69551	1.25774	0.997558	0.759952	0.552673	1.34695	1.52022	1.00527	1.0006
Relative value	Acc	Acly	Aco2	Cs	Fasn	Fh	Glut1	Glut2	Glut3	Glut4	Hk1	Hk2	Hmgcr	Idh2	Mdh2	Nd1	Nd6	Ogdh	Pdha	Sdhb	Suclg2
Ctrl 1	1.01587	1.33865	1.12791	0.761093	1.18777	0.889886	0.679044		1.22208	1.63136	1.31463	1.38629	1.26962	1.10684	0.928115	0.955797	1.03243	1.08476	0.758418	0.913171	1.08633
Ctrl 2	1.51355	0.987559	0.938951	1.21655	0.687697	0.989156	1.11735		0.990788	0.846728	0.520578	1.13015	0.972018	1.16288	1.06206	0.988304	1.06869	0.966656	1.13437	1.01071	0.974887
Ctrl 3	0.47058	0.673792	0.933137	1.02236	1.12453	1.12096	1.20361		0.787127	0.521915	1.16479	0.483561	0.758367	0.730276	1.00983	1.0559	0.898881	0.948585	1.10721	1.07612	0.938788
Testo 1	3.22557	1.6945	1.0862	0.884266	1.34415	0.963869	0.942371		1.42702	0.103335	0.889434	0.719569	1.25302	1.22714	0.966555	0.553919	0.488791	1.14622	1.19694	1.13491	1.00797
Testo 2	2.0466	1.68681	1.28044	1.21838	1.40536	1.02416	0.524544		1.74351	0.498513	1.20014	0.832003	1.2798	1.21886	1.04818	0.722446	0.455925	1.10868	0.719471	1.19602	1.17234
Testo 3	5.15473	2.19042	1.19283	0.625989	3.05799	0.913321	1.25477		3.76101	0.854332	1.22337	0.534823	1.65847	1.23204	0.996026	0.759298	0.551154	1.34456	1.49579	1.06829	0.998666
