# Supplementary material for: Testosterone-induced metabolic changes in seminal vesicle epithelium modify seminal plasma components with potential to improve sperm motility
Source: eLife. 2025 Dec 18;13:RP95541. doi: 10.7554/eLife.95541 (PMC12714332; doi:10.7554/eLife.95541)
Supplement: Figure 6—figure supplement 1—source data 1. [file elife-95541-fig6-figsupp1-data1.xlsx]

## Sheet: Supplementary Figure 4
Figure S4
Figure S4 A	16:0 (Palmitic acid)		18:0 (Stearic acid)		18:1 (Oleic acid)
	Ctrl	Flu	Ctrl	Flu	Ctrl	Flu
1	7.36477	7.48204	6.47303	9.951	5.95563	Not detected
2	10.0629	5.98054	8.0622	7.34809	9.16071	Not detected
3	6.32309	7.87045	6.70366	9.02861	4.76198	Not detected
Figure S4 B
Elovl6	ΔΔCt		2^-ΔΔCt		Relative value (Fold change)
	Ctrl	Flu	Ctrl	Flu	Ctrl	Flu
1	-0.0300579	0.42638	1.02105	0.744127	1.02006	0.743402
2	0.0110264	0.588032	0.992386	0.66525	0.99142	0.664602
3	-0.0832863	0.473345	1.05943	0.720293	1.0584	0.719591
4	0.111418	0.495613	0.925678	0.70926	0.924777	0.70857
5	-0.00909996	0.549292	1.00633	0.683356	1.00535	0.68269
