# Supplementary material for: Testosterone-induced metabolic changes in seminal vesicle epithelium modify seminal plasma components with potential to improve sperm motility
Source: eLife. 2025 Dec 18;13:RP95541. doi: 10.7554/eLife.95541 (PMC12714332; doi:10.7554/eLife.95541)
Supplement: Figure 6—figure supplement 2—source data 1. [file elife-95541-fig6-figsupp2-data1.xlsx]

## Sheet: Supplementary Figure 5
Figure S5
motile	LM 0%	LM 0.01%	LM 0.1%	LM 1%		prg %	LM 0%	LM 0.01%	LM 0.1%	LM 1%
1	98.1	97.1	97.8	98.4		1	56.4	51.2	58.5	63
2	96.7	95.1	98.4	96.3		2	49.6	57.9	56.3	62
3	97.9	98.6	97.6	99.3		3	57.2	62.1	58.7	65.8
4	97.7	98.4	98.6	98.3		4	59.8	53.2	61.7	60.8
VCL	LM 0%	LM 0.01%	LM 0.1%	LM 1%		VSL	LM 0%	LM 0.01%	LM 0.1%	LM 1%		LIN	LM 0%	LM 0.01%	LM 0.1%	LM 1%
1	160.011	145.842	156.502	159.947		1	76.6326	71.8086	80.6747	82.1325		1	44.5499	46.6846	49.5263	50.8832
2	138.368	164.555	156.932	164.419		2	68.5233	78.8041	72.7586	84.5283		2	47.2715	44.855	47.5395	47.4255
3	156.35	168.002	168.706	175.642		3	76.4233	80.9801	76.6129	86.9826		3	47.9518	48.9212	43.6484	51.7819
4	149.656	146.695	165.981	172.943		4	78.6417	74.6011	81.0419	81.4952		4	51.949	49.6858	51.0109	48.5725
