# Supplementary material for: Testosterone-induced metabolic changes in seminal vesicle epithelium modify seminal plasma components with potential to improve sperm motility
Source: eLife. 2025 Dec 18;13:RP95541. doi: 10.7554/eLife.95541 (PMC12714332; doi:10.7554/eLife.95541)
Supplement: Figure 6—source data 1. [file elife-95541-fig6-data1.xlsx]

## Sheet: Figure 6
	Figure 6
	Figure 6 A						Figure 6 B
	Ctrl	Ctrl+indinavir	Testo	Testo+Indinavir			Ctrl	Ctrl+Indinavir	Testo	Testo+Indinavir
1	8523	3114	24997	3470		1	0.416248	0.0889237	2.49367	0.357331
2	10708	3084	22184	2015		2	0.207489	0.142757	2.14136	-0.0892644
3	12056	2344	22787	3375		3	0.0255973	0.808955	1.95502	0.145261
4	10778	3047	24967	4069		4	0.0725191	-0.108447	2.17225	1.30735
						5	0.0361489	1.21869	1.56689	0.108862
	Figure 6 D	WB		Figure 6 E								Figure 6 F	Elovl6
	Ctrl	Testo		16:0 (Palmitic acid)		18:0 (Stearic acid)		18:1 (Oleic acid)				Ctrl	Testo
1	0.388923	10.5843		Ctrl	Testo	Ctrl	Testo	Ctrl	Testo		1	0.776804	3.14926
2	1.54985	8.44476	1	68.936	6.19701	29.3297	2.43763	71.0585	275.837		2	0.867651	2.60267
3	1.06123	15.7132	2	129.057	67.3481	51.7248	22.844	102.767	442.998		3	1.35554	4.74282
			3	46.283	123.185	13.668	29.6819	44.1944	456.327
