# Supplementary material for: Testosterone-induced metabolic changes in seminal vesicle epithelium modify seminal plasma components with potential to improve sperm motility
Source: eLife. 2025 Dec 18;13:RP95541. doi: 10.7554/eLife.95541 (PMC12714332; doi:10.7554/eLife.95541)
Supplement: Figure 7—source data 1. [file elife-95541-fig7-data1.xlsx]

## Sheet: Figure 7
Figure 7
Figure 7 B					Figure 7 D
	Ctrl	Testo			Ctrl+scramble	Ctrl+shACLY	Testo+scramble	Testo+shACLY
1	0.388923	10.5843		1	27200	43500	5440	43500
2	1.54985	8.44476		2	27400	32600	10900	27200
3	1.06123	15.7132		3	32600	38100	16300	49000
				4	27200	49000	10900	43500
Figure 7 E
	Ctrl+scramble			Ctrl+shACLY			Testo+scramble			Testo+shACLY
Time (minutes)	1	2	3	1	2	3	1	2	3	1	2	3
1.54	21.2098	19.2474	15.7335	43.076	41.7828	47.0946	12.2806	13.1669	13.7326	24.0204	31.0423	30.9018
8.05	20.5025	18.1567	13.708	44.4971	44.2166	49.1332	13.7527	14.9149	16.5786	28.1358	35.3844	32.6745
14.56	20.2133	17.8081	13.7963	44.624	44.6865	50.4653	14.2977	13.6018	16.1288	27.7461	35.4975	32.1012
21.06	19.5373	17.7499	15.0062	45.7044	41.7895	49.8938	14.0521	12.5836	16.2017	28.3015	36.3765	33.0821
27.56	18.7684	16.1006	13.6698	44.6456	40.1285	48.1856	14.3043	12.4508	15.1909	27.5954	35.9231	32.8409
34.13	6.21166	6.2558	4.57233	14.8426	13.2341	17.2662	7.44256	6.9312	7.09245	11.3383	8.87384	9.65031
40.63	6.36978	5.47737	5.47495	16.1514	14.5817	16.9436	8.62641	7.44217	7.38756	10.6343	10.0971	10.3197
47.13	7.47674	5.87365	6.2124	16.5334	15.5885	17.3504	7.76958	7.02568	7.67914	11.6277	9.89632	11.4805
53.7	28.255	17.795	13.5349	32.9127	34.8822	47.7497	20.4176	16.6194	21.6181	32.9596	21.1369	20.0486
60.19	23.5639	14.1513	10.7116	29.7042	37.9454	40.1872	20.9216	15.4397	17.0576	24.2049	16.789	17.8014
66.68	21.4187	13.3955	11.605	33.2994	45.9783	38.6968	22.9788	16.6223	18.4524	22.4494	17.519	19.2307
73.26	8.94702	5.33867	5.01083	15.1277	14.8163	15.607	7.28136	6.05174	7.0546	7.70601	8.08032	7.17356
79.76	7.35094	6.06084	3.9778	12.5781	13.2505	13.0573	6.41552	5.41413	7.23644	7.33125	5.9182	6.50687
86.25	7.57774	6.22085	4.94974	12.5786	13.9878	14.236	6.75224	5.91742	7.83636	7.16705	5.98557	6.75231
												(pmol/min)
Figure 7 F
Basal OCR	Ctrl+scramble	Ctrl+shACLY	Testo+scramble	Testo+shACLY
1	11.42	32.07	7.89	20.43
2	10.76	26.88	7.04	30
3	9.69	35.13	8.14	26.33
				(pmol/min)
Figure 7 G
	Ctrl+scramble	Ctrl+shACLY	Testo+scramble	Testo+shACLY
1	6.7096	2.05308	6.76853	2.7672
2	3.25945	2.2631	5.34358	2.71239
3	0.833773	1.12108	5.47908	1.18867
4	3.65608	2.2861	12.599	2.2861
5	3.6294	0.145261	3.91005	4.35248
				(Δmg/dL)
Figure 7 H	16:0 (Palmitic acid)					Figure 7 I	18:0 (Stearic acid)					Figure 7 J	18:1 (Oleic acid)
1	46.3155	24.7992	23.8844	17.1508		1	47.0603	25.9928	68.2688	20.1902		1	63.8902	33.4988	156.781	25.1096
2	26.0543	13.5597	32.1174	25.7869		2	27.838	21.1164	58.3532	26.7953		2	37.7959	18.444	86.5588	36.756
3	39.7612	18.3665	25.2695	18.8602		3	40.5428	22.3539	36.0321	20.1017		3	54.7064	24.0967	161.493	23.0813
Figure 7 K						Figure 7 L						Figure 7 M						Figure 7 N
Motile	Ctrl+scramble	Ctrl+shACLY	Testo+scramble	Testo+shACLY		Progressive	Ctrl+scramble	Ctrl+shACLY	Testo+scramble	Testo+shACLY		VSL	Ctrl+scramble	Ctrl+shACLY	Testo+scramble	Testo+shACLY		LIN	Ctrl+scramble	Ctrl+shACLY	Testo+scramble	Testo+shACLY
1	77.2	83.8	92.6	89.3		1	39.4	42.1	63.6	45.4		1	56.8027	53.5008	74.7975	59.664		1	39.4145	38.4599	42.959	41.9725
2	75.2	80.2	81.5	82.1		2	39.6	38.9	49.2	49.3		2	62.7898	56.1467	70.2763	59.7771		2	38.8788	38.8252	42.8515	43.8029
3	78.1	85	78.4	84.1		3	47.5	39.5	45	40.2		3	59.0508	52.6584	68.1155	48.244		3	40.8453	40.8937	45.4323	40.4815
4	73.9	70.1	91.1	86.4		4	45.8	33.8	34.6	51.7		4	59.4953	48.2893	50.0426	62.1827		4	40.6262	36.1725	50.7153	40.2798
5	86.6	89.5	90	87.4		5	45.2	46.4	53.9	43.9		5	61.9544	60.3223	73.594	58.0941		5	41.2315	39.625	46.4763	39.5526
6	81.6	82.8	96.5	85.1		6	52.6	48.9	53.3	44.2		6	64.5953	63.1331	68.1875	61.9288		6	40.6363	40.2788	50.6472	41.519
				(%)						(%)						(µm/sec)						(%)
