# Supplementary material for: Testosterone-induced metabolic changes in seminal vesicle epithelium modify seminal plasma components with potential to improve sperm motility
Source: eLife. 2025 Dec 18;13:RP95541. doi: 10.7554/eLife.95541 (PMC12714332; doi:10.7554/eLife.95541)
Supplement: Figure 8—source data 1. [file elife-95541-fig8-data1.xlsx]

## Sheet: Figure 8
Figure 8
Figure 8 B
		Ctrl	Testo
d2	1	59800	21800
	2	43500	32600
	3	38100	38100
d4	1	70700	49000
	2	81600	76100
	3	92500	38100
d6	1	190000	51700
	2	218000	54400
	3	163000	68000
			(cells)
Figure 8 C
	Ctrl 1	Ctrl 2	Ctrl 3	Testo 1	Testo 2	Testo 3
1.53	11.4091	7.04768	5.51525	7.43032	8.83038	8.7328
8.02	8.51255	7.23831	5.31584	7.24395	8.61652	8.93363
14.52	8.66149	7.92779	4.78242	8.2551	8.1515	8.74217
21.01	8.74777	8.26787	5.47464	9.03051	9.61989	9.19575
27.5	8.84044	7.99772	5.32782	8.8421	8.90501	8.36238
34.08	13.3703	17.1181	10.5045	17.1545	19.4842	15.8195
40.58	13.5055	17.3564	10.9919	17.8454	19.4969	16.884
47.07	13.2977	17.5073	10.8494	18.234	19.3403	16.7249
53.65	21.5391	20.8142	17.4114	24.3007	25.3297	22.571
60.17	21.353	20.235	17.0558	24.5779	26.382	23.2107
66.68	21.3325	20.5503	17.7861	25.5959	26.4466	23.4724
73.27	10.4227	10.157	7.47035	7.65945	8.2302	7.56555
79.79	8.18836	7.92822	5.0781	5.12826	4.81139	4.51327
86.3	7.43605	8.26979	4.99996	4.39158	4.3091	4.04395
						(mpH/min)
Figure 8 D				Figure 8 E
Glucose induced ECAR	Ctrl	Testo		Oligomycin-sensitive ECAR	Ctrl	Testo
1	13.2977	18.234		1	21.3325	25.5959
2	17.5073	19.3403		2	20.5503	26.4466
3	10.8494	16.7249		3	17.7861	23.4724
		(mpH/min)				(mpH/min)
Figure 8 F
	Ctrl 1	Ctrl 2	Ctrl 3	Testo 1	Testo 2	Testo 3
1.53	48.9814	46.4659	49.609	58.9892	53.8421	53.0829
8.02	50.0119	52.8985	53.394	56.8475	56.3616	54.13
14.52	48.8692	56.3658	54.4514	56.4932	56.8534	55.1057
21.01	51.5752	59.8892	56.5489	55.6088	56.8194	55.7539
27.51	51.3896	62.35	57.594	54.4928	56.5393	55.9017
34.09	22.7309	29.2154	24.6599	20.3514	18.888	17.8958
40.58	21.8673	26.1834	23.7432	17.4812	17.3164	17.9607
47.08	22.5877	27.3295	26.3181	17.3564	17.8808	18.7966
53.66	202.32	277.765	194.633	104.851	142.509	141.119
60.15	188.818	227.695	161.461	89.0586	111.484	107.732
66.65	186.583	218.705	148.98	86.0421	103.953	99.3474
73.23	29.079	30.4483	30.0599	20.6107	21.492	19.2819
79.73	27.1524	29.0974	26.9023	17.0445	18.4095	16.5222
86.23	25.052	27.7039	25.8366	15.7687	17.7824	15.736
						(pmol/min)
Figure 8 G				Figure 8 H
Basal OCR	Ctrl	Testo		FCCP uncoupled respiration	Ctrl	Testo
1	26.34	38.72		1	177.27	89.08
2	34.65	38.76		2	250.06	124.73
3	31.76	40.17		3	168.8	125.38
		(pmol/min)				(pmol/min)
Figure 8 I						Figure 8 J
	Ctrl	Ctrl+indinavir	Testo	Testo+Indinavir			Ctrl	Testo	Ctrl+Indinavir	Testo+Indinavir
1	59619	41851	128686	66163		1	0.551795	2.02787	0.324691	0.2979
2	57281	53398	117253	65220		2	0.694665	1.35619	0.422904	0.553845
3	57616	43943	119373	64809		3	0.833773	1.31337	0.405096	0.343377
4	55858	48926	122080	66968						(Δmg/dL)
				(Intensity)
Figure 8 K	16:0 (Palmitic acid)					Figure 8 L	18:0 (Stearic acid)					Figure 8 M	18:1 (Oleic acid)
	Ctrl	Ctrl+Ind	Testo	Testo+Ind			Ctrl	Ctrl+Ind	Testo	Testo+Ind			Ctrl	Ctrl+Ind	Testo	Testo+Ind
1	4.92222	1.9862	9.83449	3.08704		1	5.45015	3.57787	9.15134	5.83131		1	6.50879		13.0296
2	5.56881	1.95948	13.4313	2.05188		2	5.43593	3.73219	13.954	3.82473		2	7.43999		12.8187
3	6.08692	1.81897	8.54118	2.15747		3	5.51022	3.43498	8.82723	3.81438		3	7.56389		9.28757
